# Supplementary material
Source: publisher figshare collection journal article supplement (https://acs.figshare.com/ndownloader/files/4529203)
Supplement: Supplementary file 1 [file 4529203]

data_General
_audit_creation_date                  '2008-04-12'
_audit_creation_method                'by CrystalStructure 3.8'
_audit_update_record                   ?

#==============================================================================

# PROCESSING SUMMARY (IUCr Office Use Only)

_journal_date_recd_electronic     ?
_journal_date_from_coeditor       ?
_journal_date_accepted            ?
_journal_coeditor_code            ?

#==============================================================================

# SUBMISSION DETAILS

_publ_contact_author_name             'Hiroshi Fujii'
_publ_contact_author_address          'Myodaiji, Okazaki, Aichi 444-8787, Japan'
_publ_contact_author_email            'hiro@ims.ac.jp'
_publ_contact_author_fax              '+81-564-59-5600'
_publ_contact_author_phone            '+81-564-59-5579'
_publ_contact_letter
;
    ENTER TEXT OF LETTER
;
_publ_requested_journal               'ENTER JOURNAL NAME HERE'
_publ_requested_category              'FM'
_publ_requested_coeditor_name          ?

#==============================================================================

# TITLE AND AUTHOR LIST

_publ_section_title
;
    ENTER SECTION TITLE
;
_publ_section_title_footnote
;
    ENTER FOOTNOTE TO TITLE OF PAPER
;
loop_
_publ_author_name
_publ_author_footnote
_publ_author_address
' FIRST AUTHORS NAME '
;
  FIRST AUTHORS FOOTNOTES
;
;
  FIRST AUTHORS ADDRESS
;
_publ_section_synopsis
;
  ENTER SYNOPSIS
;

#==============================================================================

# TEXT

_publ_section_abstract
;
    ENTER ABSTRACT
;
_publ_section_comment
;
    ENTER TEXT
;
_publ_section_references
;
    ENTER OTHER REFERENCES

    Rigaku Americas and Rigaku Corporation. (2007).
    CrystalStructure (Version 3.8). 
    Single Crystal Structure Analysis Software.
    Rigaku Americas, 9009 TX, USA 77381-5209.
    Rigaku, Tokyo 196-8666, Japan.

    Altomare, A., Burla, M., Camalli, M., Cascarano, G., 
    Giacovazzo, C., Guagliardi, A., Moliterni, A., Polidori, 
    G., and Spagna, R. (1999). J. Appl. Cryst., 32, 115-119. 
    SIR97

    Sheldrick, G.M. (1997). SHELXL97. University of Gottingen, Germany.

;
_publ_section_figure_captions
;
    ENTER FIGURE CAPTIONS
;
_publ_section_exptl_prep
;
    ENTER COMPOUND PREPARATION DETAILS
;
_publ_section_exptl_refinement
;
    ENTER SPECIAL DETAILS OF THE REFINEMENT
;

#==============================================================================

data___0844a

#==============================================================================

# CHEMICAL DATA

_chemical_formula_sum                  'C76 H112 Cl12 Mn2 N4 O4 '
_chemical_formula_moiety               'C76 H112 Cl12 Mn2 N4 O4 '
_chemical_formula_weight               1681.06
_chemical_melting_point                ?
_chemical_absolute_configuration       rm

#==============================================================================

# CRYSTAL DATA
_symmetry_cell_setting                 triclinic
_symmetry_space_group_name_H-M        'P 1'
_symmetry_space_group_name_Hall       'P 1'
_symmetry_Int_Tables_number            1
loop_
_symmetry_equiv_pos_site_id
_symmetry_equiv_pos_as_xyz
1   '+X,+Y,+Z'

#------------------------------------------------------------------------------

_cell_length_a                         12.628(4)
_cell_length_b                         12.917(5)
_cell_length_c                         14.498(6)
_cell_angle_alpha                      82.04(3)
_cell_angle_beta                       73.07(2)
_cell_angle_gamma                      65.24(2)
_cell_volume                           2053.9(13)
_cell_formula_units_Z                  1
_cell_measurement_reflns_used          6189
_cell_measurement_theta_min            3.0
_cell_measurement_theta_max            27.5
_cell_measurement_temperature          93

#------------------------------------------------------------------------------

_exptl_crystal_description            'block'
_exptl_crystal_colour                 'dark red'
_exptl_crystal_size_max                0.20
_exptl_crystal_size_mid                0.15
_exptl_crystal_size_min                0.15
_exptl_crystal_density_diffrn          1.359
_exptl_crystal_density_meas            ?
_exptl_crystal_density_method         'not measured'
_exptl_crystal_F_000                   882.00
_exptl_absorpt_coefficient_mu          0.746
_exptl_absorpt_correction_type         numerical
_exptl_absorpt_process_details         
;
    Higashi, T. (1999). Program for Absorption Correction.
    Rigaku Corporation, Tokyo, Japan.
;
_exptl_absorpt_correction_T_min        0.806
_exptl_absorpt_correction_T_max        0.894

#==============================================================================

# EXPERIMENTAL DATA

_diffrn_radiation_type                'Mo K\a'
_diffrn_radiation_wavelength           0.71070
_diffrn_measurement_device_type       'Rigaku Mercury'
_diffrn_measurement_method             \w
_diffrn_detector_area_resol_mean       7.31
_diffrn_reflns_number                  15791
_diffrn_reflns_av_R_equivalents        0.039
_diffrn_reflns_theta_max               27.48
_diffrn_measured_fraction_theta_max    0.974
_diffrn_reflns_theta_full              27.48
_diffrn_measured_fraction_theta_full   0.974
_diffrn_reflns_limit_h_min             -14
_diffrn_reflns_limit_h_max             16
_diffrn_reflns_limit_k_min             -16
_diffrn_reflns_limit_k_max             14
_diffrn_reflns_limit_l_min             -18
_diffrn_reflns_limit_l_max             17

#==============================================================================

# REFINEMENT DATA

_refine_special_details
;
    Refinement was performed using all reflections. The weighted 
    R-factor (wR) and goodness of fit (S) are based on F^2^.
    R-factor (gt) are based on F. The threshold expression of
    F^2^ > 2.0 sigma(F^2^) is used only for calculating R-factor (gt).
;
_reflns_number_total                   10989
_reflns_number_gt                      8392
_reflns_threshold_expression           F^2^>2.0\s(F^2^)
_refine_ls_structure_factor_coef       Fsqd
_refine_ls_R_factor_gt                 0.0842
_refine_ls_wR_factor_ref               0.2474
_refine_ls_hydrogen_treatment          refall
_refine_ls_number_reflns               10989
_refine_ls_number_parameters           885
_refine_ls_goodness_of_fit_ref         1.093
_refine_ls_weighting_scheme            calc
_refine_ls_weighting_details
   'w = 1/[\s^2^(Fo^2^)+(0.1433P)^2^+1.7209P] where P=(Fo^2^+2Fc^2^)/3'
_refine_ls_shift/su_max                0.0000
_refine_diff_density_max               1.68
_refine_diff_density_min               -0.89
_refine_ls_extinction_method           none
_refine_ls_extinction_coef             ?
_refine_ls_abs_structure_details
   'Flack, H. D. (1983), Acta Cryst. A39, 876-881.  1813 Friedel Pairs'
_refine_ls_abs_structure_Flack         0.04(5)

loop_
_atom_type_symbol
_atom_type_description
_atom_type_scat_dispersion_real
_atom_type_scat_dispersion_imag
_atom_type_scat_source
  'C' 'C'  0.003 0.002 
;
International Tables for Crystallography
(1992, Vol. C, Tables 4.2.6.8 and 6.1.1.4)
;
  'H' 'H'  0.000 0.000 
;
International Tables for Crystallography
(1992, Vol. C, Table 6.1.1.4)
;
  'Cl' 'Cl'  0.148 0.159 
;
International Tables for Crystallography
(1992, Vol. C, Tables 4.2.6.8 and 6.1.1.4)
;
  'Mn' 'Mn'  0.337 0.728 
;
International Tables for Crystallography
(1992, Vol. C, Tables 4.2.6.8 and 6.1.1.4)
;
  'N' 'N'  0.006 0.003 
;
International Tables for Crystallography
(1992, Vol. C, Tables 4.2.6.8 and 6.1.1.4)
;
  'O' 'O'  0.011 0.006 
;
International Tables for Crystallography
(1992, Vol. C, Tables 4.2.6.8 and 6.1.1.4)
;

#==============================================================================

# ATOMIC COORDINATES AND THERMAL PARAMETERS

loop_
_atom_site_label
_atom_site_type_symbol
_atom_site_fract_x
_atom_site_fract_y
_atom_site_fract_z
_atom_site_U_iso_or_equiv
_atom_site_adp_type
_atom_site_occupancy
_atom_site_symmetry_multiplicity
_atom_site_calc_flag
_atom_site_refinement_flags
_atom_site_disorder_assembly
_atom_site_disorder_group
 Mn(1) Mn -0.29359(12) -0.09960(13) -0.27306(11) 0.0195(3) Uani 1.00 1 d . . .
 Mn(2) Mn -0.19252(12) -0.61026(13) -0.52295(11) 0.0181(3) Uani 1.00 1 d . . .
 Cl(1) Cl -0.4517(2) 0.0760(2) -0.2652(2) 0.0333(6) Uani 1.00 1 d . . .
 Cl(2) Cl -0.1393(2) -0.2738(2) -0.2880(2) 0.0326(6) Uani 1.00 1 d . . .
 Cl(3) Cl -0.3680(2) -0.4531(2) -0.5081(2) 0.0294(5) Uani 1.00 1 d . . .
 Cl(4) Cl -0.0185(2) -0.7691(2) -0.52795(19) 0.0274(5) Uani 1.00 1 d . . .
 Cl(5) Cl 0.0867(2) -0.5381(2) -0.2359(2) 0.0351(6) Uani 1.00 1 d . . .
 Cl(6) Cl -0.0531(2) -0.5657(3) -0.0409(2) 0.0429(7) Uani 1.00 1 d . . .
 Cl(7) Cl 0.2514(3) -0.7587(3) -0.0337(3) 0.0562(10) Uani 1.00 1 d . . .
 Cl(8) Cl 0.4135(2) -0.7179(3) 0.0497(2) 0.0446(8) Uani 1.00 1 d . . .
 Cl(9) Cl 0.1082(2) -0.9914(3) 0.1587(3) 0.0477(9) Uani 1.00 1 d . . .
 Cl(10) Cl 0.2664(3) -0.9477(3) 0.2447(3) 0.0589(11) Uani 1.00 1 d . . .
 Cl(11) Cl -0.5778(2) -0.1737(2) -0.5613(2) 0.0344(6) Uani 1.00 1 d . . .
 Cl(12) Cl -0.4333(3) -0.1534(3) -0.7558(2) 0.0427(7) Uani 1.00 1 d . . .
 O(1) O -0.2400(6) -0.0602(6) -0.1813(5) 0.0221(15) Uani 1.00 1 d . . .
 O(2) O -0.3907(6) -0.1596(7) -0.1826(5) 0.0244(15) Uani 1.00 1 d . . .
 O(3) O -0.2325(6) -0.6681(6) -0.6113(5) 0.0217(15) Uani 1.00 1 d . . .
 O(4) O -0.1108(6) -0.5338(6) -0.6127(5) 0.0204(15) Uani 1.00 1 d . . .
 N(1) N -0.1852(7) -0.0499(7) -0.3817(6) 0.0189(17) Uani 1.00 1 d . . .
 N(2) N -0.3436(7) -0.1323(7) -0.3786(6) 0.0216(18) Uani 1.00 1 d . . .
 N(3) N -0.2739(7) -0.6855(7) -0.4170(6) 0.0188(16) Uani 1.00 1 d . . .
 N(4) N -0.1676(7) -0.5525(8) -0.4142(6) 0.0240(19) Uani 1.00 1 d . . .
 C(1) C -0.1467(8) -0.0333(8) -0.1928(7) 0.0181(19) Uani 1.00 1 d . . .
 C(2) C -0.1069(9) -0.0323(9) -0.1108(8) 0.022(2) Uani 1.00 1 d . . .
 C(3) C -0.0099(8) -0.0033(8) -0.1258(8) 0.021(2) Uani 1.00 1 d . . .
 C(4) C 0.0566(8) 0.0239(8) -0.2170(8) 0.022(2) Uani 1.00 1 d . . .
 C(5) C 0.0147(8) 0.0246(8) -0.2942(8) 0.021(2) Uani 1.00 1 d . . .
 C(6) C -0.0815(9) -0.0051(10) -0.2863(8) 0.025(2) Uani 1.00 1 d . . .
 C(7) C -0.1094(9) -0.0117(9) -0.3725(8) 0.025(2) Uani 1.00 1 d . . .
 C(8) C -0.4498(9) -0.2186(9) -0.1928(8) 0.024(2) Uani 1.00 1 d . . .
 C(9) C -0.5119(8) -0.2614(8) -0.1086(8) 0.019(2) Uani 1.00 1 d . . .
 C(10) C -0.5787(8) -0.3188(9) -0.1192(9) 0.025(2) Uani 1.00 1 d . . .
 C(11) C -0.5898(8) -0.3385(9) -0.2077(9) 0.024(2) Uani 1.00 1 d . . .
 C(12) C -0.5269(8) -0.2972(10) -0.2897(9) 0.028(2) Uani 1.00 1 d . . .
 C(13) C -0.4601(9) -0.2379(10) -0.2819(9) 0.027(2) Uani 1.00 1 d . . .
 C(14) C -0.4054(9) -0.1914(10) -0.3708(8) 0.027(2) Uani 1.00 1 d . . .
 C(15) C -0.1812(8) -0.0805(9) -0.4777(6) 0.0228(19) Uani 1.00 1 d . . .
 C(16) C -0.3048(9) -0.0750(9) -0.4722(6) 0.028(2) Uani 1.00 1 d . . .
 C(17) C -0.3089(10) -0.1200(11) -0.5623(8) 0.032(2) Uani 1.00 1 d . . .
 C(18) C -0.2654(9) -0.0515(10) -0.6504(7) 0.033(2) Uani 1.00 1 d . . .
 C(19) C -0.1462(9) -0.0538(10) -0.6552(7) 0.031(2) Uani 1.00 1 d . . .
 C(20) C -0.1432(9) -0.0096(9) -0.5619(7) 0.023(2) Uani 1.00 1 d . . .
 C(21) C -0.1676(9) -0.0653(10) -0.0100(8) 0.027(2) Uani 1.00 1 d . . .
 C(22) C -0.1167(10) -0.0532(11) 0.0671(9) 0.034(2) Uani 1.00 1 d . . .
 C(23) C -0.3068(9) 0.0142(11) 0.0183(9) 0.034(2) Uani 1.00 1 d . . .
 C(24) C -0.1516(11) -0.1893(10) -0.0121(9) 0.030(2) Uani 1.00 1 d . . .
 C(25) C 0.1656(8) 0.0529(7) -0.2296(9) 0.022(2) Uani 1.00 1 d . . .
 C(26) C 0.2275(10) -0.0032(11) -0.1453(9) 0.032(2) Uani 1.00 1 d . . .
 C(27) C 0.1258(9) 0.1789(9) -0.2216(9) 0.030(2) Uani 1.00 1 d . . .
 C(28) C 0.2605(9) 0.0092(10) -0.3234(9) 0.032(2) Uani 1.00 1 d . . .
 C(29) C -0.5018(9) -0.2476(10) -0.0081(8) 0.026(2) Uani 1.00 1 d . . .
 C(30) C -0.5471(11) -0.1209(11) 0.0130(9) 0.035(2) Uani 1.00 1 d . . .
 C(31) C -0.3684(9) -0.3131(9) -0.0039(8) 0.024(2) Uani 1.00 1 d . . .
 C(32) C -0.5799(10) -0.2947(10) 0.0727(8) 0.030(2) Uani 1.00 1 d . . .
 C(33) C -0.6726(9) -0.3966(12) -0.2154(9) 0.035(2) Uani 1.00 1 d . . .
 C(34) C -0.6799(10) -0.4809(10) -0.1364(8) 0.029(2) Uani 1.00 1 d . . .
 C(35) C -0.7983(11) -0.2997(10) -0.2071(11) 0.040(3) Uani 1.00 1 d . . .
 C(36) C -0.6301(10) -0.4536(11) -0.3097(9) 0.032(2) Uani 1.00 1 d . . .
 C(37) C -0.3317(8) -0.6870(9) -0.5998(7) 0.020(2) Uani 1.00 1 d . . .
 C(38) C -0.3730(8) -0.6888(8) -0.6806(7) 0.0179(19) Uani 1.00 1 d . . .
 C(39) C -0.4728(9) -0.7120(9) -0.6655(8) 0.022(2) Uani 1.00 1 d . . .
 C(40) C -0.5381(9) -0.7351(9) -0.5755(8) 0.024(2) Uani 1.00 1 d . . .
 C(41) C -0.4949(9) -0.7398(8) -0.4971(8) 0.021(2) Uani 1.00 1 d . . .
 C(42) C -0.3914(8) -0.7144(8) -0.5107(7) 0.0149(18) Uani 1.00 1 d . . .
 C(43) C -0.3569(8) -0.7170(9) -0.4225(8) 0.020(2) Uani 1.00 1 d . . .
 C(44) C -0.0398(8) -0.4861(8) -0.6036(7) 0.017(2) Uani 1.00 1 d . . .
 C(45) C 0.0257(8) -0.4466(8) -0.6877(8) 0.020(2) Uani 1.00 1 d . . .
 C(46) C 0.0980(8) -0.3969(10) -0.6753(7) 0.024(2) Uani 1.00 1 d . . .
 C(47) C 0.1120(8) -0.3788(8) -0.5851(7) 0.0187(19) Uani 1.00 1 d . . .
 C(48) C 0.0437(8) -0.4168(9) -0.5056(7) 0.0182(19) Uani 1.00 1 d . . .
 C(49) C -0.0327(8) -0.4681(8) -0.5107(7) 0.020(2) Uani 1.00 1 d . . .
 C(50) C -0.0966(8) -0.5008(9) -0.4234(7) 0.020(2) Uani 1.00 1 d . . .
 C(51) C -0.2419(8) -0.6901(8) -0.3247(6) 0.0250(19) Uani 1.00 1 d . . .
 C(52) C -0.2445(7) -0.5698(8) -0.3204(6) 0.0202(17) Uani 1.00 1 d . . .
 C(53) C -0.2070(8) -0.5628(8) -0.2314(7) 0.0200(19) Uani 1.00 1 d . . .
 C(54) C -0.2848(8) -0.5949(8) -0.1421(6) 0.0233(18) Uani 1.00 1 d . . .
 C(55) C -0.2824(9) -0.7127(9) -0.1478(7) 0.0253(19) Uani 1.00 1 d . . .
 C(56) C -0.3220(9) -0.7188(10) -0.2343(8) 0.025(2) Uani 1.00 1 d . . .
 C(57) C -0.3090(8) -0.6560(9) -0.7821(7) 0.0189(19) Uani 1.00 1 d . . .
 C(58) C -0.3700(11) -0.6634(13) -0.8587(8) 0.036(3) Uani 1.00 1 d . . .
 C(59) C -0.1789(10) -0.7373(11) -0.8116(8) 0.031(2) Uani 1.00 1 d . . .
 C(60) C -0.3228(11) -0.5344(10) -0.7828(9) 0.031(2) Uani 1.00 1 d . . .
 C(61) C -0.6513(9) -0.7599(10) -0.5644(7) 0.027(2) Uani 1.00 1 d . . .
 C(62) C -0.7142(9) -0.7015(10) -0.6430(8) 0.027(2) Uani 1.00 1 d . . .
 C(63) C -0.6109(9) -0.8906(10) -0.5633(9) 0.030(2) Uani 1.00 1 d . . .
 C(64) C -0.7435(9) -0.7121(11) -0.4682(8) 0.029(2) Uani 1.00 1 d . . .
 C(65) C 0.0140(8) -0.4605(9) -0.7869(7) 0.020(2) Uani 1.00 1 d . . .
 C(66) C -0.1135(9) -0.3891(11) -0.7940(9) 0.033(2) Uani 1.00 1 d . . .
 C(67) C 0.0514(8) -0.5867(9) -0.8051(8) 0.025(2) Uani 1.00 1 d . . .
 C(68) C 0.0963(11) -0.4142(13) -0.8688(9) 0.037(3) Uani 1.00 1 d . . .
 C(69) C 0.1951(8) -0.3237(8) -0.5787(7) 0.0175(19) Uani 1.00 1 d . . .
 C(70) C 0.1970(12) -0.2313(13) -0.6542(12) 0.049(3) Uani 1.00 1 d . . .
 C(71) C 0.3240(9) -0.4219(12) -0.5928(13) 0.054(4) Uani 1.00 1 d . . .
 C(72) C 0.1590(11) -0.2702(12) -0.4812(10) 0.039(3) Uani 1.00 1 d . . .
 C(73) C -0.4738(14) -0.2420(13) -0.6708(11) 0.058(4) Uani 1.00 1 d . . .
 C(74) C 0.0001(12) -0.4742(11) -0.1280(10) 0.042(3) Uani 1.00 1 d . . .
 C(75) C 0.1265(13) -0.8933(14) 0.2191(12) 0.053(4) Uani 1.00 1 d . . .
 C(76) C 0.3948(10) -0.8160(13) -0.0102(12) 0.047(3) Uani 1.00 1 d . . .
 H(1) H 0.0152 -0.0012 -0.0706 0.026 Uiso 1.00 1 c R . .
 H(2) H 0.0529 0.0463 -0.3558 0.025 Uiso 1.00 1 c R . .
 H(3) H -0.0678 0.0150 -0.4298 0.030 Uiso 1.00 1 c R . .
 H(4) H -0.6198 -0.3467 -0.0625 0.030 Uiso 1.00 1 c R . .
 H(5) H -0.5299 -0.3098 -0.3517 0.033 Uiso 1.00 1 c R . .
 H(6) H -0.4168 -0.2065 -0.4287 0.033 Uiso 1.00 1 c R . .
 H(7) H -0.1226 -0.1616 -0.4892 0.027 Uiso 1.00 1 c R . .
 H(8) H -0.3613 0.0073 -0.4675 0.033 Uiso 1.00 1 c R . .
 H(9) H -0.3922 -0.1105 -0.5576 0.038 Uiso 1.00 1 c R . .
 H(10) H -0.2557 -0.2022 -0.5692 0.038 Uiso 1.00 1 c R . .
 H(11) H -0.2609 -0.0837 -0.7103 0.039 Uiso 1.00 1 c R . .
 H(12) H -0.3251 0.0286 -0.6467 0.039 Uiso 1.00 1 c R . .
 H(13) H -0.1243 -0.0062 -0.7108 0.037 Uiso 1.00 1 c R . .
 H(14) H -0.0849 -0.1330 -0.6661 0.037 Uiso 1.00 1 c R . .
 H(15) H -0.0607 -0.0165 -0.5667 0.028 Uiso 1.00 1 c R . .
 H(16) H -0.1990 0.0717 -0.5529 0.028 Uiso 1.00 1 c R . .
 H(17) H -0.0491 -0.1248 0.0745 0.041 Uiso 1.00 1 c R . .
 H(18) H -0.1795 -0.0354 0.1282 0.041 Uiso 1.00 1 c R . .
 H(19) H -0.0882 0.0085 0.0491 0.041 Uiso 1.00 1 c R . .
 H(20) H -0.3196 0.0812 0.0516 0.041 Uiso 1.00 1 c R . .
 H(21) H -0.3515 -0.0281 0.0609 0.041 Uiso 1.00 1 c R . .
 H(22) H -0.3356 0.0389 -0.0402 0.041 Uiso 1.00 1 c R . .
 H(23) H -0.2201 -0.1912 -0.0295 0.036 Uiso 1.00 1 c R . .
 H(24) H -0.1478 -0.2250 0.0518 0.036 Uiso 1.00 1 c R . .
 H(25) H -0.0766 -0.2309 -0.0598 0.036 Uiso 1.00 1 c R . .
 H(26) H 0.1914 0.0498 -0.0917 0.038 Uiso 1.00 1 c R . .
 H(27) H 0.3141 -0.0207 -0.1684 0.038 Uiso 1.00 1 c R . .
 H(28) H 0.2156 -0.0737 -0.1233 0.038 Uiso 1.00 1 c R . .
 H(29) H 0.1253 0.2151 -0.2856 0.036 Uiso 1.00 1 c R . .
 H(30) H 0.1817 0.1932 -0.1956 0.036 Uiso 1.00 1 c R . .
 H(31) H 0.0443 0.2105 -0.1785 0.036 Uiso 1.00 1 c R . .
 H(32) H 0.3180 -0.0680 -0.3129 0.039 Uiso 1.00 1 c R . .
 H(33) H 0.3035 0.0597 -0.3458 0.039 Uiso 1.00 1 c R . .
 H(34) H 0.2214 0.0075 -0.3722 0.039 Uiso 1.00 1 c R . .
 H(35) H -0.4798 -0.0967 -0.0097 0.042 Uiso 1.00 1 c R . .
 H(36) H -0.5806 -0.1093 0.0827 0.042 Uiso 1.00 1 c R . .
 H(37) H -0.6099 -0.0758 -0.0203 0.042 Uiso 1.00 1 c R . .
 H(38) H -0.3548 -0.3917 0.0185 0.029 Uiso 1.00 1 c R . .
 H(39) H -0.3514 -0.2754 0.0408 0.029 Uiso 1.00 1 c R . .
 H(40) H -0.3148 -0.3136 -0.0683 0.029 Uiso 1.00 1 c R . .
 H(41) H -0.6602 -0.2341 0.0952 0.037 Uiso 1.00 1 c R . .
 H(42) H -0.5420 -0.3226 0.1263 0.037 Uiso 1.00 1 c R . .
 H(43) H -0.5876 -0.3575 0.0481 0.037 Uiso 1.00 1 c R . .
 H(44) H -0.6168 -0.5561 -0.1569 0.035 Uiso 1.00 1 c R . .
 H(45) H -0.7593 -0.4844 -0.1204 0.035 Uiso 1.00 1 c R . .
 H(46) H -0.6684 -0.4582 -0.0795 0.035 Uiso 1.00 1 c R . .
 H(47) H -0.8445 -0.2910 -0.1394 0.048 Uiso 1.00 1 c R . .
 H(48) H -0.8409 -0.3181 -0.2449 0.048 Uiso 1.00 1 c R . .
 H(49) H -0.7895 -0.2284 -0.2318 0.048 Uiso 1.00 1 c R . .
 H(50) H -0.6672 -0.3993 -0.3570 0.039 Uiso 1.00 1 c R . .
 H(51) H -0.6532 -0.5186 -0.3017 0.039 Uiso 1.00 1 c R . .
 H(52) H -0.5421 -0.4806 -0.3324 0.039 Uiso 1.00 1 c R . .
 H(53) H -0.4996 -0.7125 -0.7202 0.026 Uiso 1.00 1 c R . .
 H(54) H -0.5335 -0.7596 -0.4348 0.025 Uiso 1.00 1 c R . .
 H(55) H -0.3981 -0.7436 -0.3650 0.024 Uiso 1.00 1 c R . .
 H(56) H 0.1427 -0.3723 -0.7319 0.028 Uiso 1.00 1 c R . .
 H(57) H 0.0492 -0.4073 -0.4436 0.022 Uiso 1.00 1 c R . .
 H(58) H -0.0867 -0.4833 -0.3657 0.024 Uiso 1.00 1 c R . .
 H(59) H -0.1571 -0.7473 -0.3311 0.030 Uiso 1.00 1 c R . .
 H(60) H -0.3290 -0.5123 -0.3150 0.024 Uiso 1.00 1 c R . .
 H(61) H -0.1214 -0.6150 -0.2380 0.024 Uiso 1.00 1 c R . .
 H(62) H -0.2150 -0.4843 -0.2256 0.024 Uiso 1.00 1 c R . .
 H(63) H -0.3691 -0.5377 -0.1323 0.028 Uiso 1.00 1 c R . .
 H(64) H -0.2566 -0.5931 -0.0856 0.028 Uiso 1.00 1 c R . .
 H(65) H -0.1996 -0.7711 -0.1523 0.030 Uiso 1.00 1 c R . .
 H(66) H -0.3368 -0.7288 -0.0886 0.030 Uiso 1.00 1 c R . .
 H(67) H -0.4069 -0.6644 -0.2275 0.030 Uiso 1.00 1 c R . .
 H(68) H -0.3172 -0.7965 -0.2387 0.030 Uiso 1.00 1 c R . .
 H(69) H -0.3302 -0.7406 -0.8847 0.044 Uiso 1.00 1 c R . .
 H(70) H -0.3625 -0.6082 -0.9111 0.044 Uiso 1.00 1 c R . .
 H(71) H -0.4556 -0.6463 -0.8285 0.044 Uiso 1.00 1 c R . .
 H(72) H -0.1294 -0.7089 -0.7901 0.037 Uiso 1.00 1 c R . .
 H(73) H -0.1524 -0.7436 -0.8820 0.037 Uiso 1.00 1 c R . .
 H(74) H -0.1699 -0.8125 -0.7820 0.037 Uiso 1.00 1 c R . .
 H(75) H -0.3968 -0.4836 -0.8014 0.037 Uiso 1.00 1 c R . .
 H(76) H -0.2531 -0.5255 -0.8292 0.037 Uiso 1.00 1 c R . .
 H(77) H -0.3276 -0.5151 -0.7183 0.037 Uiso 1.00 1 c R . .
 H(78) H -0.7752 -0.6257 -0.6218 0.032 Uiso 1.00 1 c R . .
 H(79) H -0.7533 -0.7470 -0.6566 0.032 Uiso 1.00 1 c R . .
 H(80) H -0.6548 -0.6939 -0.7015 0.032 Uiso 1.00 1 c R . .
 H(81) H -0.5885 -0.9165 -0.6293 0.036 Uiso 1.00 1 c R . .
 H(82) H -0.6774 -0.9107 -0.5240 0.036 Uiso 1.00 1 c R . .
 H(83) H -0.5412 -0.9275 -0.5358 0.036 Uiso 1.00 1 c R . .
 H(84) H -0.7281 -0.7704 -0.4171 0.035 Uiso 1.00 1 c R . .
 H(85) H -0.8254 -0.6903 -0.4744 0.035 Uiso 1.00 1 c R . .
 H(86) H -0.7357 -0.6450 -0.4517 0.035 Uiso 1.00 1 c R . .
 H(87) H -0.1623 -0.4344 -0.7717 0.040 Uiso 1.00 1 c R . .
 H(88) H -0.1127 -0.3646 -0.8611 0.040 Uiso 1.00 1 c R . .
 H(89) H -0.1482 -0.3219 -0.7536 0.040 Uiso 1.00 1 c R . .
 H(90) H 0.1383 -0.6215 -0.8355 0.030 Uiso 1.00 1 c R . .
 H(91) H 0.0070 -0.5931 -0.8478 0.030 Uiso 1.00 1 c R . .
 H(92) H 0.0329 -0.6260 -0.7436 0.030 Uiso 1.00 1 c R . .
 H(93) H 0.0505 -0.3334 -0.8818 0.044 Uiso 1.00 1 c R . .
 H(94) H 0.1228 -0.4576 -0.9275 0.044 Uiso 1.00 1 c R . .
 H(95) H 0.1669 -0.4224 -0.8484 0.044 Uiso 1.00 1 c R . .
 H(96) H 0.2609 -0.2645 -0.7123 0.059 Uiso 1.00 1 c R . .
 H(97) H 0.2124 -0.1736 -0.6293 0.059 Uiso 1.00 1 c R . .
 H(98) H 0.1188 -0.1958 -0.6699 0.059 Uiso 1.00 1 c R . .
 H(99) H 0.3354 -0.4568 -0.5301 0.064 Uiso 1.00 1 c R . .
 H(100) H 0.3851 -0.3907 -0.6225 0.064 Uiso 1.00 1 c R . .
 H(101) H 0.3323 -0.4797 -0.6348 0.064 Uiso 1.00 1 c R . .
 H(102) H 0.1021 -0.1906 -0.4834 0.047 Uiso 1.00 1 c R . .
 H(103) H 0.2310 -0.2732 -0.4661 0.047 Uiso 1.00 1 c R . .
 H(104) H 0.1207 -0.3124 -0.4314 0.047 Uiso 1.00 1 c R . .
 H(105) H -0.4002 -0.3012 -0.6551 0.070 Uiso 1.00 1 c R . .
 H(106) H -0.5108 -0.2809 -0.6977 0.070 Uiso 1.00 1 c R . .
 H(107) H -0.0702 -0.4061 -0.1394 0.050 Uiso 1.00 1 c R . .
 H(108) H 0.0482 -0.4479 -0.1013 0.050 Uiso 1.00 1 c R . .
 H(109) H 0.1174 -0.8233 0.1786 0.064 Uiso 1.00 1 c R . .
 H(110) H 0.0620 -0.8721 0.2801 0.064 Uiso 1.00 1 c R . .
 H(111) H 0.4043 -0.8863 0.0300 0.057 Uiso 1.00 1 c R . .
 H(112) H 0.4581 -0.8369 -0.0718 0.057 Uiso 1.00 1 c R . .


loop_
_atom_site_aniso_label
_atom_site_aniso_U_11
_atom_site_aniso_U_22
_atom_site_aniso_U_33
_atom_site_aniso_U_12
_atom_site_aniso_U_13
_atom_site_aniso_U_23
 Mn(1) 0.0213(6) 0.0240(7) 0.0130(7) -0.0092(5) -0.0032(5) -0.0014(5)
 Mn(2) 0.0213(6) 0.0243(7) 0.0097(7) -0.0106(5) -0.0032(5) 0.0000(5)
 Cl(1) 0.0401(14) 0.0300(13) 0.0250(14) -0.0098(10) -0.0089(10) 0.0011(10)
 Cl(2) 0.0338(13) 0.0299(13) 0.0241(14) -0.0034(10) -0.0064(10) -0.0021(10)
 Cl(3) 0.0311(12) 0.0293(13) 0.0207(13) -0.0043(9) -0.0067(9) -0.0034(10)
 Cl(4) 0.0240(11) 0.0331(13) 0.0190(12) -0.0069(9) -0.0038(8) -0.0007(10)
 Cl(5) 0.0402(14) 0.0387(16) 0.0283(16) -0.0199(12) -0.0039(11) -0.0043(12)
 Cl(6) 0.0398(16) 0.060(2) 0.0314(18) -0.0243(15) -0.0043(12) -0.0030(15)
 Cl(7) 0.0424(18) 0.065(2) 0.066(2) -0.0165(16) -0.0193(17) -0.020(2)
 Cl(8) 0.0376(15) 0.0504(19) 0.047(2) -0.0145(13) -0.0121(13) -0.0112(16)
 Cl(9) 0.0394(16) 0.051(2) 0.055(2) -0.0185(14) -0.0091(15) -0.0137(18)
 Cl(10) 0.051(2) 0.064(2) 0.061(2) -0.0115(17) -0.0238(18) -0.019(2)
 Cl(11) 0.0347(13) 0.0410(16) 0.0323(17) -0.0191(12) -0.0089(11) -0.0025(13)
 Cl(12) 0.0520(18) 0.051(2) 0.0295(18) -0.0260(15) -0.0123(13) 0.0069(14)
 O(1) 0.029(3) 0.030(3) 0.014(3) -0.017(3) -0.011(2) 0.008(2)
 O(2) 0.038(3) 0.035(4) 0.007(3) -0.022(3) -0.004(2) -0.001(2)
 O(3) 0.023(3) 0.029(3) 0.018(3) -0.015(2) -0.004(2) -0.000(3)
 O(4) 0.022(3) 0.026(3) 0.021(4) -0.014(2) -0.010(2) 0.002(2)
 N(1) 0.025(3) 0.033(4) 0.008(3) -0.023(3) -0.003(2) 0.005(3)
 N(2) 0.027(4) 0.028(4) 0.015(4) -0.017(3) -0.003(3) -0.002(3)
 N(3) 0.024(3) 0.018(3) 0.011(4) -0.007(3) -0.001(2) -0.000(3)
 N(4) 0.029(4) 0.034(4) 0.012(4) -0.014(3) -0.005(3) -0.002(3)
 C(1) 0.024(4) 0.016(4) 0.015(5) -0.010(3) -0.010(3) 0.010(3)
 C(2) 0.032(5) 0.021(5) 0.017(5) -0.013(4) -0.010(4) 0.006(4)
 C(3) 0.023(4) 0.016(4) 0.021(5) -0.004(3) -0.004(3) -0.004(4)
 C(4) 0.018(4) 0.016(4) 0.026(6) -0.004(3) 0.001(3) -0.003(4)
 C(5) 0.022(4) 0.021(5) 0.018(5) -0.013(3) 0.003(3) 0.002(4)
 C(6) 0.026(5) 0.031(5) 0.022(6) -0.015(4) -0.007(4) 0.000(4)
 C(7) 0.040(5) 0.032(5) 0.016(5) -0.027(4) -0.010(4) 0.009(4)
 C(8) 0.027(5) 0.016(4) 0.023(6) -0.006(4) -0.003(4) 0.000(4)
 C(9) 0.023(4) 0.021(4) 0.018(5) -0.015(3) -0.008(3) 0.011(4)
 C(10) 0.018(4) 0.027(5) 0.028(6) -0.010(4) -0.004(4) 0.008(4)
 C(11) 0.010(4) 0.025(5) 0.035(6) -0.006(3) -0.004(3) -0.005(4)
 C(12) 0.017(4) 0.041(6) 0.027(6) -0.005(4) -0.010(4) -0.014(5)
 C(13) 0.025(5) 0.036(6) 0.030(6) -0.023(4) -0.006(4) -0.002(5)
 C(14) 0.033(5) 0.033(5) 0.018(5) -0.014(4) -0.006(4) -0.008(4)
 C(15) 0.025(4) 0.036(5) 0.009(4) -0.019(4) 0.006(3) -0.007(3)
 C(16) 0.042(5) 0.035(5) 0.014(4) -0.028(4) -0.001(3) -0.001(4)
 C(17) 0.038(5) 0.051(7) 0.011(5) -0.025(5) -0.002(4) -0.000(4)
 C(18) 0.040(5) 0.046(6) 0.016(4) -0.023(4) -0.008(4) 0.008(4)
 C(19) 0.037(5) 0.054(7) 0.015(4) -0.031(5) -0.006(4) -0.003(4)
 C(20) 0.026(4) 0.030(5) 0.012(5) -0.011(4) -0.001(3) -0.005(4)
 C(21) 0.028(5) 0.042(6) 0.020(6) -0.024(4) -0.007(4) 0.004(4)
 C(22) 0.037(6) 0.041(7) 0.035(7) -0.021(5) -0.011(5) -0.007(5)
 C(23) 0.030(5) 0.048(7) 0.031(7) -0.018(5) -0.008(4) -0.012(5)
 C(24) 0.042(5) 0.030(5) 0.024(6) -0.014(4) -0.019(4) 0.004(4)
 C(25) 0.020(4) 0.008(4) 0.044(7) -0.001(3) -0.020(4) -0.007(4)
 C(26) 0.029(5) 0.040(6) 0.039(7) -0.017(4) -0.021(5) 0.002(5)
 C(27) 0.026(5) 0.024(5) 0.037(7) -0.001(4) -0.013(4) -0.006(5)
 C(28) 0.023(5) 0.034(6) 0.040(7) -0.011(4) -0.007(4) -0.004(5)
 C(29) 0.021(4) 0.038(6) 0.018(5) -0.014(4) -0.004(3) 0.012(4)
 C(30) 0.046(6) 0.046(7) 0.019(6) -0.028(5) -0.007(4) 0.002(5)
 C(31) 0.034(5) 0.025(5) 0.014(5) -0.015(4) -0.004(4) 0.005(4)
 C(32) 0.046(6) 0.038(6) 0.011(5) -0.022(5) -0.005(4) -0.001(4)
 C(33) 0.025(5) 0.060(8) 0.029(7) -0.028(5) -0.001(4) -0.004(6)
 C(34) 0.041(6) 0.030(6) 0.017(5) -0.018(4) -0.006(4) 0.005(4)
 C(35) 0.045(6) 0.026(6) 0.056(9) -0.019(5) -0.015(5) -0.001(5)
 C(36) 0.031(5) 0.041(6) 0.035(7) -0.028(4) 0.002(4) -0.008(5)
 C(37) 0.026(4) 0.028(5) 0.012(5) -0.014(4) -0.003(3) -0.011(4)
 C(38) 0.021(4) 0.021(4) 0.013(5) -0.010(3) -0.005(3) 0.000(3)
 C(39) 0.030(4) 0.023(5) 0.019(5) -0.016(4) -0.010(4) 0.008(4)
 C(40) 0.025(4) 0.027(5) 0.024(6) -0.013(4) -0.008(4) -0.001(4)
 C(41) 0.031(5) 0.012(4) 0.018(5) -0.004(3) -0.014(4) 0.010(3)
 C(42) 0.017(4) 0.019(4) 0.012(4) -0.007(3) -0.006(3) -0.003(3)
 C(43) 0.024(4) 0.021(4) 0.013(5) -0.008(3) -0.003(3) -0.000(3)
 C(44) 0.019(4) 0.019(4) 0.014(5) -0.008(3) -0.003(3) -0.004(3)
 C(45) 0.025(4) 0.019(4) 0.015(5) -0.008(3) -0.003(3) -0.000(4)
 C(46) 0.024(4) 0.038(6) 0.006(5) -0.014(4) 0.003(3) 0.000(4)
 C(47) 0.025(4) 0.016(4) 0.013(5) -0.006(3) -0.005(3) 0.003(3)
 C(48) 0.026(4) 0.024(5) 0.005(4) -0.012(4) -0.003(3) 0.003(3)
 C(49) 0.027(4) 0.016(4) 0.011(5) -0.005(3) -0.003(3) 0.002(3)
 C(50) 0.023(4) 0.022(4) 0.017(5) -0.010(3) -0.007(3) 0.002(3)
 C(51) 0.032(4) 0.029(5) 0.010(4) -0.008(3) -0.008(3) 0.003(3)
 C(52) 0.019(3) 0.026(4) 0.018(4) -0.014(3) -0.001(3) 0.001(3)
 C(53) 0.031(4) 0.025(4) 0.014(4) -0.020(4) -0.008(3) -0.001(3)
 C(54) 0.026(4) 0.036(5) 0.011(4) -0.018(3) -0.000(3) 0.000(3)
 C(55) 0.032(4) 0.033(5) 0.013(4) -0.019(4) -0.003(3) 0.004(3)
 C(56) 0.026(4) 0.037(6) 0.020(5) -0.022(4) -0.005(3) 0.005(4)
 C(57) 0.028(4) 0.021(4) 0.008(4) -0.013(3) -0.003(3) 0.005(3)
 C(58) 0.043(6) 0.079(9) 0.008(5) -0.048(6) -0.005(4) 0.012(5)
 C(59) 0.041(6) 0.041(6) 0.012(5) -0.026(5) 0.007(4) -0.004(4)
 C(60) 0.051(6) 0.032(6) 0.024(6) -0.031(5) -0.013(5) 0.007(4)
 C(61) 0.025(4) 0.042(6) 0.009(5) -0.014(4) -0.001(3) 0.010(4)
 C(62) 0.027(4) 0.035(6) 0.024(6) -0.018(4) -0.009(4) 0.002(4)
 C(63) 0.023(5) 0.036(6) 0.039(7) -0.018(4) -0.014(4) 0.011(5)
 C(64) 0.026(5) 0.048(7) 0.020(5) -0.023(5) -0.004(4) 0.000(5)
 C(65) 0.024(4) 0.025(5) 0.015(5) -0.013(4) -0.005(3) -0.003(4)
 C(66) 0.024(5) 0.053(7) 0.026(6) -0.015(5) -0.014(4) 0.004(5)
 C(67) 0.019(4) 0.020(5) 0.023(6) 0.002(3) -0.000(3) -0.004(4)
 C(68) 0.043(6) 0.068(9) 0.016(6) -0.044(6) -0.005(4) 0.015(5)
 C(69) 0.025(4) 0.015(4) 0.015(5) -0.010(3) -0.007(3) 0.003(3)
 C(70) 0.048(7) 0.059(9) 0.064(10) -0.043(7) -0.016(6) -0.004(7)
 C(71) 0.017(5) 0.038(7) 0.105(14) -0.015(4) -0.013(6) 0.013(8)
 C(72) 0.046(6) 0.053(8) 0.033(7) -0.033(6) -0.012(5) 0.002(5)
 C(73) 0.070(9) 0.050(9) 0.041(9) -0.013(7) 0.008(6) -0.040(7)
 C(74) 0.066(8) 0.034(6) 0.036(8) -0.031(6) -0.020(6) 0.012(5)
 C(75) 0.059(8) 0.052(9) 0.045(10) -0.016(7) -0.009(7) -0.023(7)
 C(76) 0.022(5) 0.062(9) 0.048(9) -0.006(5) -0.009(5) -0.008(7)

#==============================================================================

_computing_data_collection            'CrystalClear'
_computing_cell_refinement            'CrystalClear'
_computing_data_reduction             'CrystalStructure'
_computing_structure_solution         'SIR97'
_computing_structure_refinement       'SHELXL'
_computing_publication_material       'CrystalStructure 3.8'
_computing_molecular_graphics          ?

#==============================================================================

# MOLECULAR GEOMETRY

_geom_special_details
;
    ENTER SPECIAL DETAILS OF THE MOLECULAR GEOMETRY
;

loop_
_geom_bond_atom_site_label_1
_geom_bond_atom_site_label_2
_geom_bond_distance
_geom_bond_publ_flag
_geom_bond_site_symmetry_1
_geom_bond_site_symmetry_2
Mn(1) Cl(1) 2.300(2) yes . .
Mn(1) Cl(2) 2.263(2) yes . .
Mn(1) O(1) 1.867(10) yes . .
Mn(1) O(2) 1.844(8) yes . .
Mn(1) N(1) 1.992(8) yes . .
Mn(1) N(2) 1.971(11) yes . .
Mn(2) Cl(3) 2.270(2) yes . .
Mn(2) Cl(4) 2.283(2) yes . .
Mn(2) O(3) 1.847(10) yes . .
Mn(2) O(4) 1.857(8) yes . .
Mn(2) N(3) 1.965(8) yes . .
Mn(2) N(4) 1.988(11) yes . .
Cl(5) C(74) 1.711(13) yes . .
Cl(6) C(74) 1.789(15) yes . .
Cl(7) C(76) 1.763(14) yes . .
Cl(8) C(76) 1.76(2) yes . .
Cl(9) C(75) 1.76(2) yes . .
Cl(10) C(75) 1.739(18) yes . .
Cl(11) C(73) 1.796(14) yes . .
Cl(12) C(73) 1.680(17) yes . .
O(1) C(1) 1.321(16) yes . .
O(2) C(8) 1.316(18) yes . .
O(3) C(37) 1.334(15) yes . .
O(4) C(44) 1.325(16) yes . .
N(1) C(7) 1.292(19) yes . .
N(1) C(15) 1.479(14) yes . .
N(2) C(14) 1.277(19) yes . .
N(2) C(16) 1.505(13) yes . .
N(3) C(43) 1.297(17) yes . .
N(3) C(51) 1.494(15) yes . .
N(4) C(50) 1.295(18) yes . .
N(4) C(52) 1.473(12) yes . .
C(1) C(2) 1.424(18) yes . .
C(1) C(6) 1.453(15) yes . .
C(2) C(3) 1.376(18) yes . .
C(2) C(21) 1.534(15) yes . .
C(3) C(4) 1.432(15) yes . .
C(4) C(5) 1.368(18) yes . .
C(4) C(25) 1.527(17) yes . .
C(5) C(6) 1.391(19) yes . .
C(6) C(7) 1.415(19) yes . .
C(8) C(9) 1.425(15) yes . .
C(8) C(13) 1.40(2) yes . .
C(9) C(10) 1.38(2) yes . .
C(9) C(29) 1.539(18) yes . .
C(10) C(11) 1.40(2) yes . .
C(11) C(12) 1.400(16) yes . .
C(11) C(33) 1.55(2) yes . .
C(12) C(13) 1.39(2) yes . .
C(13) C(14) 1.453(17) yes . .
C(15) C(16) 1.511(17) yes . .
C(15) C(20) 1.509(15) yes . .
C(16) C(17) 1.524(18) yes . .
C(17) C(18) 1.550(17) yes . .
C(18) C(19) 1.475(19) yes . .
C(19) C(20) 1.555(18) yes . .
C(21) C(22) 1.50(2) yes . .
C(21) C(23) 1.580(14) yes . .
C(21) C(24) 1.53(2) yes . .
C(25) C(26) 1.570(18) yes . .
C(25) C(27) 1.498(15) yes . .
C(25) C(28) 1.518(15) yes . .
C(29) C(30) 1.534(19) yes . .
C(29) C(31) 1.551(15) yes . .
C(29) C(32) 1.533(17) yes . .
C(33) C(34) 1.478(18) yes . .
C(33) C(35) 1.538(15) yes . .
C(33) C(36) 1.49(2) yes . .
C(37) C(38) 1.420(18) yes . .
C(37) C(42) 1.376(14) yes . .
C(38) C(39) 1.366(18) yes . .
C(38) C(57) 1.556(14) yes . .
C(39) C(40) 1.394(15) yes . .
C(40) C(41) 1.380(19) yes . .
C(40) C(61) 1.552(19) yes . .
C(41) C(42) 1.431(17) yes . .
C(42) C(43) 1.458(17) yes . .
C(44) C(45) 1.423(14) yes . .
C(44) C(49) 1.432(17) yes . .
C(45) C(46) 1.38(2) yes . .
C(45) C(65) 1.530(17) yes . .
C(46) C(47) 1.432(17) yes . .
C(47) C(48) 1.389(14) yes . .
C(47) C(69) 1.523(19) yes . .
C(48) C(49) 1.403(19) yes . .
C(49) C(50) 1.404(14) yes . .
C(51) C(52) 1.550(16) yes . .
C(51) C(56) 1.512(14) yes . .
C(52) C(53) 1.524(16) yes . .
C(53) C(54) 1.504(13) yes . .
C(54) C(55) 1.522(17) yes . .
C(55) C(56) 1.500(18) yes . .
C(57) C(58) 1.56(2) yes . .
C(57) C(59) 1.503(13) yes . .
C(57) C(60) 1.504(18) yes . .
C(61) C(62) 1.512(17) yes . .
C(61) C(63) 1.545(18) yes . .
C(61) C(64) 1.541(14) yes . .
C(65) C(66) 1.509(14) yes . .
C(65) C(67) 1.533(16) yes . .
C(65) C(68) 1.566(18) yes . .
C(69) C(70) 1.506(19) yes . .
C(69) C(71) 1.565(13) yes . .
C(69) C(72) 1.521(19) yes . .
C(3) H(1) 0.950 no . .
C(5) H(2) 0.950 no . .
C(7) H(3) 0.950 no . .
C(10) H(4) 0.950 no . .
C(12) H(5) 0.950 no . .
C(14) H(6) 0.950 no . .
C(15) H(7) 1.000 no . .
C(16) H(8) 1.000 no . .
C(17) H(9) 0.990 no . .
C(17) H(10) 0.990 no . .
C(18) H(11) 0.990 no . .
C(18) H(12) 0.990 no . .
C(19) H(13) 0.990 no . .
C(19) H(14) 0.990 no . .
C(20) H(15) 0.990 no . .
C(20) H(16) 0.990 no . .
C(22) H(17) 0.980 no . .
C(22) H(18) 0.980 no . .
C(22) H(19) 0.980 no . .
C(23) H(20) 0.980 no . .
C(23) H(21) 0.980 no . .
C(23) H(22) 0.980 no . .
C(24) H(23) 0.980 no . .
C(24) H(24) 0.980 no . .
C(24) H(25) 0.980 no . .
C(26) H(26) 0.980 no . .
C(26) H(27) 0.980 no . .
C(26) H(28) 0.980 no . .
C(27) H(29) 0.980 no . .
C(27) H(30) 0.980 no . .
C(27) H(31) 0.980 no . .
C(28) H(32) 0.980 no . .
C(28) H(33) 0.980 no . .
C(28) H(34) 0.980 no . .
C(30) H(35) 0.980 no . .
C(30) H(36) 0.980 no . .
C(30) H(37) 0.980 no . .
C(31) H(38) 0.980 no . .
C(31) H(39) 0.980 no . .
C(31) H(40) 0.980 no . .
C(32) H(41) 0.980 no . .
C(32) H(42) 0.980 no . .
C(32) H(43) 0.980 no . .
C(34) H(44) 0.980 no . .
C(34) H(45) 0.980 no . .
C(34) H(46) 0.980 no . .
C(35) H(47) 0.980 no . .
C(35) H(48) 0.980 no . .
C(35) H(49) 0.980 no . .
C(36) H(50) 0.980 no . .
C(36) H(51) 0.980 no . .
C(36) H(52) 0.980 no . .
C(39) H(53) 0.950 no . .
C(41) H(54) 0.950 no . .
C(43) H(55) 0.950 no . .
C(46) H(56) 0.950 no . .
C(48) H(57) 0.950 no . .
C(50) H(58) 0.950 no . .
C(51) H(59) 1.000 no . .
C(52) H(60) 1.000 no . .
C(53) H(61) 0.990 no . .
C(53) H(62) 0.990 no . .
C(54) H(63) 0.990 no . .
C(54) H(64) 0.990 no . .
C(55) H(65) 0.990 no . .
C(55) H(66) 0.990 no . .
C(56) H(67) 0.990 no . .
C(56) H(68) 0.990 no . .
C(58) H(69) 0.980 no . .
C(58) H(70) 0.980 no . .
C(58) H(71) 0.980 no . .
C(59) H(72) 0.980 no . .
C(59) H(73) 0.980 no . .
C(59) H(74) 0.980 no . .
C(60) H(75) 0.980 no . .
C(60) H(76) 0.980 no . .
C(60) H(77) 0.980 no . .
C(62) H(78) 0.980 no . .
C(62) H(79) 0.980 no . .
C(62) H(80) 0.980 no . .
C(63) H(81) 0.980 no . .
C(63) H(82) 0.980 no . .
C(63) H(83) 0.980 no . .
C(64) H(84) 0.980 no . .
C(64) H(85) 0.980 no . .
C(64) H(86) 0.980 no . .
C(66) H(87) 0.980 no . .
C(66) H(88) 0.980 no . .
C(66) H(89) 0.980 no . .
C(67) H(90) 0.980 no . .
C(67) H(91) 0.980 no . .
C(67) H(92) 0.980 no . .
C(68) H(93) 0.980 no . .
C(68) H(94) 0.980 no . .
C(68) H(95) 0.980 no . .
C(70) H(96) 0.980 no . .
C(70) H(97) 0.980 no . .
C(70) H(98) 0.980 no . .
C(71) H(99) 0.980 no . .
C(71) H(100) 0.980 no . .
C(71) H(101) 0.980 no . .
C(72) H(102) 0.980 no . .
C(72) H(103) 0.980 no . .
C(72) H(104) 0.980 no . .
C(73) H(105) 0.990 no . .
C(73) H(106) 0.990 no . .
C(74) H(107) 0.990 no . .
C(74) H(108) 0.990 no . .
C(75) H(109) 0.990 no . .
C(75) H(110) 0.990 no . .
C(76) H(111) 0.990 no . .
C(76) H(112) 0.990 no . .

loop_
_geom_angle_atom_site_label_1
_geom_angle_atom_site_label_2
_geom_angle_atom_site_label_3
_geom_angle
_geom_angle_publ_flag
_geom_angle_site_symmetry_1
_geom_angle_site_symmetry_2
_geom_angle_site_symmetry_3
Cl(1) Mn(1) Cl(2) 177.06(15) yes . . .
Cl(1) Mn(1) O(1) 92.1(2) yes . . .
Cl(1) Mn(1) O(2) 91.1(2) yes . . .
Cl(1) Mn(1) N(1) 92.7(2) yes . . .
Cl(1) Mn(1) N(2) 86.7(2) yes . . .
Cl(2) Mn(1) O(1) 90.8(2) yes . . .
Cl(2) Mn(1) O(2) 89.6(2) yes . . .
Cl(2) Mn(1) N(1) 86.3(2) yes . . .
Cl(2) Mn(1) N(2) 90.5(2) yes . . .
O(1) Mn(1) O(2) 93.8(4) yes . . .
O(1) Mn(1) N(1) 92.2(4) yes . . .
O(1) Mn(1) N(2) 174.6(3) yes . . .
O(2) Mn(1) N(1) 172.8(4) yes . . .
O(2) Mn(1) N(2) 91.4(4) yes . . .
N(1) Mn(1) N(2) 82.7(4) yes . . .
Cl(3) Mn(2) Cl(4) 176.52(12) yes . . .
Cl(3) Mn(2) O(3) 90.0(2) yes . . .
Cl(3) Mn(2) O(4) 90.4(2) yes . . .
Cl(3) Mn(2) N(3) 89.9(2) yes . . .
Cl(3) Mn(2) N(4) 87.4(2) yes . . .
Cl(4) Mn(2) O(3) 92.4(2) yes . . .
Cl(4) Mn(2) O(4) 91.9(2) yes . . .
Cl(4) Mn(2) N(3) 87.6(2) yes . . .
Cl(4) Mn(2) N(4) 89.9(2) yes . . .
O(3) Mn(2) O(4) 96.0(3) yes . . .
O(3) Mn(2) N(3) 90.4(4) yes . . .
O(3) Mn(2) N(4) 172.0(3) yes . . .
O(4) Mn(2) N(3) 173.6(4) yes . . .
O(4) Mn(2) N(4) 91.5(4) yes . . .
N(3) Mn(2) N(4) 82.1(4) yes . . .
Mn(1) O(1) C(1) 129.7(6) yes . . .
Mn(1) O(2) C(8) 130.9(7) yes . . .
Mn(2) O(3) C(37) 127.9(6) yes . . .
Mn(2) O(4) C(44) 130.8(7) yes . . .
Mn(1) N(1) C(7) 125.0(7) yes . . .
Mn(1) N(1) C(15) 113.6(8) yes . . .
C(7) N(1) C(15) 120.5(8) yes . . .
Mn(1) N(2) C(14) 125.6(8) yes . . .
Mn(1) N(2) C(16) 112.3(8) yes . . .
C(14) N(2) C(16) 122.1(11) yes . . .
Mn(2) N(3) C(43) 124.1(7) yes . . .
Mn(2) N(3) C(51) 113.0(7) yes . . .
C(43) N(3) C(51) 122.5(9) yes . . .
Mn(2) N(4) C(50) 124.8(7) yes . . .
Mn(2) N(4) C(52) 112.3(8) yes . . .
C(50) N(4) C(52) 122.8(10) yes . . .
O(1) C(1) C(2) 119.2(9) yes . . .
O(1) C(1) C(6) 122.9(11) yes . . .
C(2) C(1) C(6) 117.9(11) yes . . .
C(1) C(2) C(3) 117.4(10) yes . . .
C(1) C(2) C(21) 121.2(11) yes . . .
C(3) C(2) C(21) 121.3(12) yes . . .
C(2) C(3) C(4) 126.0(12) yes . . .
C(3) C(4) C(5) 115.2(11) yes . . .
C(3) C(4) C(25) 123.7(11) yes . . .
C(5) C(4) C(25) 121.0(10) yes . . .
C(4) C(5) C(6) 122.8(10) yes . . .
C(1) C(6) C(5) 120.6(12) yes . . .
C(1) C(6) C(7) 121.8(12) yes . . .
C(5) C(6) C(7) 117.6(10) yes . . .
N(1) C(7) C(6) 127.0(10) yes . . .
O(2) C(8) C(9) 118.6(11) yes . . .
O(2) C(8) C(13) 123.8(10) yes . . .
C(9) C(8) C(13) 117.5(12) yes . . .
C(8) C(9) C(10) 118.5(11) yes . . .
C(8) C(9) C(29) 120.8(12) yes . . .
C(10) C(9) C(29) 120.6(10) yes . . .
C(9) C(10) C(11) 124.6(10) yes . . .
C(10) C(11) C(12) 116.0(12) yes . . .
C(10) C(11) C(33) 122.5(10) yes . . .
C(12) C(11) C(33) 121.4(12) yes . . .
C(11) C(12) C(13) 121.2(12) yes . . .
C(8) C(13) C(12) 122.2(11) yes . . .
C(8) C(13) C(14) 121.0(13) yes . . .
C(12) C(13) C(14) 116.7(12) yes . . .
N(2) C(14) C(13) 126.3(13) yes . . .
N(1) C(15) C(16) 107.1(7) yes . . .
N(1) C(15) C(20) 116.0(10) yes . . .
C(16) C(15) C(20) 110.6(8) yes . . .
N(2) C(16) C(15) 107.0(8) yes . . .
N(2) C(16) C(17) 115.6(11) yes . . .
C(15) C(16) C(17) 112.7(7) yes . . .
C(16) C(17) C(18) 107.9(12) yes . . .
C(17) C(18) C(19) 112.2(9) yes . . .
C(18) C(19) C(20) 112.8(8) yes . . .
C(15) C(20) C(19) 108.1(11) yes . . .
C(2) C(21) C(22) 113.0(12) yes . . .
C(2) C(21) C(23) 110.2(9) yes . . .
C(2) C(21) C(24) 108.2(9) yes . . .
C(22) C(21) C(23) 106.6(9) yes . . .
C(22) C(21) C(24) 109.4(10) yes . . .
C(23) C(21) C(24) 109.4(11) yes . . .
C(4) C(25) C(26) 109.9(9) yes . . .
C(4) C(25) C(27) 110.3(7) yes . . .
C(4) C(25) C(28) 112.4(11) yes . . .
C(26) C(25) C(27) 105.6(11) yes . . .
C(26) C(25) C(28) 107.2(8) yes . . .
C(27) C(25) C(28) 111.1(9) yes . . .
C(9) C(29) C(30) 110.3(9) yes . . .
C(9) C(29) C(31) 109.1(8) yes . . .
C(9) C(29) C(32) 112.3(12) yes . . .
C(30) C(29) C(31) 111.1(12) yes . . .
C(30) C(29) C(32) 105.9(8) yes . . .
C(31) C(29) C(32) 108.1(9) yes . . .
C(11) C(33) C(34) 111.5(12) yes . . .
C(11) C(33) C(35) 105.6(11) yes . . .
C(11) C(33) C(36) 111.5(10) yes . . .
C(34) C(33) C(35) 109.4(9) yes . . .
C(34) C(33) C(36) 109.2(12) yes . . .
C(35) C(33) C(36) 109.5(12) yes . . .
O(3) C(37) C(38) 120.8(9) yes . . .
O(3) C(37) C(42) 121.2(11) yes . . .
C(38) C(37) C(42) 117.8(11) yes . . .
C(37) C(38) C(39) 118.7(9) yes . . .
C(37) C(38) C(57) 119.2(10) yes . . .
C(39) C(38) C(57) 122.0(11) yes . . .
C(38) C(39) C(40) 124.5(12) yes . . .
C(39) C(40) C(41) 117.2(12) yes . . .
C(39) C(40) C(61) 121.4(11) yes . . .
C(41) C(40) C(61) 121.3(9) yes . . .
C(40) C(41) C(42) 119.2(9) yes . . .
C(37) C(42) C(41) 122.3(11) yes . . .
C(37) C(42) C(43) 123.1(11) yes . . .
C(41) C(42) C(43) 114.6(9) yes . . .
N(3) C(43) C(42) 124.7(9) yes . . .
O(4) C(44) C(45) 119.2(11) yes . . .
O(4) C(44) C(49) 121.3(9) yes . . .
C(45) C(44) C(49) 119.4(11) yes . . .
C(44) C(45) C(46) 117.5(11) yes . . .
C(44) C(45) C(65) 119.8(11) yes . . .
C(46) C(45) C(65) 122.7(9) yes . . .
C(45) C(46) C(47) 126.1(10) yes . . .
C(46) C(47) C(48) 113.7(12) yes . . .
C(46) C(47) C(69) 122.3(9) yes . . .
C(48) C(47) C(69) 124.0(10) yes . . .
C(47) C(48) C(49) 124.5(11) yes . . .
C(44) C(49) C(48) 118.7(9) yes . . .
C(44) C(49) C(50) 123.7(12) yes . . .
C(48) C(49) C(50) 117.5(11) yes . . .
N(4) C(50) C(49) 126.2(12) yes . . .
N(3) C(51) C(52) 103.1(7) yes . . .
N(3) C(51) C(56) 116.6(10) yes . . .
C(52) C(51) C(56) 111.7(8) yes . . .
N(4) C(52) C(51) 105.2(7) yes . . .
N(4) C(52) C(53) 116.3(9) yes . . .
C(51) C(52) C(53) 109.4(7) yes . . .
C(52) C(53) C(54) 110.4(10) yes . . .
C(53) C(54) C(55) 112.6(7) yes . . .
C(54) C(55) C(56) 110.3(8) yes . . .
C(51) C(56) C(55) 109.8(10) yes . . .
C(38) C(57) C(58) 110.0(10) yes . . .
C(38) C(57) C(59) 110.8(8) yes . . .
C(38) C(57) C(60) 109.7(8) yes . . .
C(58) C(57) C(59) 107.0(9) yes . . .
C(58) C(57) C(60) 107.1(10) yes . . .
C(59) C(57) C(60) 112.0(11) yes . . .
C(40) C(61) C(62) 111.7(10) yes . . .
C(40) C(61) C(63) 107.9(8) yes . . .
C(40) C(61) C(64) 109.4(11) yes . . .
C(62) C(61) C(63) 112.1(12) yes . . .
C(62) C(61) C(64) 106.5(8) yes . . .
C(63) C(61) C(64) 109.2(10) yes . . .
C(45) C(65) C(66) 109.7(8) yes . . .
C(45) C(65) C(67) 110.2(8) yes . . .
C(45) C(65) C(68) 111.0(11) yes . . .
C(66) C(65) C(67) 111.7(11) yes . . .
C(66) C(65) C(68) 105.6(9) yes . . .
C(67) C(65) C(68) 108.4(8) yes . . .
C(47) C(69) C(70) 112.5(11) yes . . .
C(47) C(69) C(71) 106.0(9) yes . . .
C(47) C(69) C(72) 112.3(9) yes . . .
C(70) C(69) C(71) 110.2(9) yes . . .
C(70) C(69) C(72) 107.0(11) yes . . .
C(71) C(69) C(72) 108.8(11) yes . . .
Cl(11) C(73) Cl(12) 114.4(9) yes . . .
Cl(5) C(74) Cl(6) 113.5(8) yes . . .
Cl(9) C(75) Cl(10) 112.4(8) yes . . .
Cl(7) C(76) Cl(8) 111.3(7) yes . . .
C(2) C(3) H(1) 117.0 no . . .
C(4) C(3) H(1) 117.0 no . . .
C(4) C(5) H(2) 118.6 no . . .
C(6) C(5) H(2) 118.6 no . . .
N(1) C(7) H(3) 116.5 no . . .
C(6) C(7) H(3) 116.5 no . . .
C(9) C(10) H(4) 117.7 no . . .
C(11) C(10) H(4) 117.7 no . . .
C(11) C(12) H(5) 119.4 no . . .
C(13) C(12) H(5) 119.4 no . . .
N(2) C(14) H(6) 116.8 no . . .
C(13) C(14) H(6) 116.9 no . . .
N(1) C(15) H(7) 107.6 no . . .
C(16) C(15) H(7) 107.6 no . . .
C(20) C(15) H(7) 107.6 no . . .
N(2) C(16) H(8) 107.1 no . . .
C(15) C(16) H(8) 107.1 no . . .
C(17) C(16) H(8) 107.0 no . . .
C(16) C(17) H(9) 110.1 no . . .
C(16) C(17) H(10) 110.1 no . . .
C(18) C(17) H(9) 110.1 no . . .
C(18) C(17) H(10) 110.1 no . . .
H(9) C(17) H(10) 108.4 no . . .
C(17) C(18) H(11) 109.2 no . . .
C(17) C(18) H(12) 109.2 no . . .
C(19) C(18) H(11) 109.2 no . . .
C(19) C(18) H(12) 109.2 no . . .
H(11) C(18) H(12) 107.9 no . . .
C(18) C(19) H(13) 109.0 no . . .
C(18) C(19) H(14) 109.0 no . . .
C(20) C(19) H(13) 109.0 no . . .
C(20) C(19) H(14) 109.0 no . . .
H(13) C(19) H(14) 107.8 no . . .
C(15) C(20) H(15) 110.1 no . . .
C(15) C(20) H(16) 110.1 no . . .
C(19) C(20) H(15) 110.1 no . . .
C(19) C(20) H(16) 110.1 no . . .
H(15) C(20) H(16) 108.4 no . . .
C(21) C(22) H(17) 109.5 no . . .
C(21) C(22) H(18) 109.5 no . . .
C(21) C(22) H(19) 109.5 no . . .
H(17) C(22) H(18) 109.5 no . . .
H(17) C(22) H(19) 109.5 no . . .
H(18) C(22) H(19) 109.5 no . . .
C(21) C(23) H(20) 109.5 no . . .
C(21) C(23) H(21) 109.5 no . . .
C(21) C(23) H(22) 109.5 no . . .
H(20) C(23) H(21) 109.5 no . . .
H(20) C(23) H(22) 109.5 no . . .
H(21) C(23) H(22) 109.5 no . . .
C(21) C(24) H(23) 109.5 no . . .
C(21) C(24) H(24) 109.5 no . . .
C(21) C(24) H(25) 109.5 no . . .
H(23) C(24) H(24) 109.5 no . . .
H(23) C(24) H(25) 109.5 no . . .
H(24) C(24) H(25) 109.5 no . . .
C(25) C(26) H(26) 109.5 no . . .
C(25) C(26) H(27) 109.5 no . . .
C(25) C(26) H(28) 109.5 no . . .
H(26) C(26) H(27) 109.5 no . . .
H(26) C(26) H(28) 109.5 no . . .
H(27) C(26) H(28) 109.5 no . . .
C(25) C(27) H(29) 109.5 no . . .
C(25) C(27) H(30) 109.5 no . . .
C(25) C(27) H(31) 109.5 no . . .
H(29) C(27) H(30) 109.5 no . . .
H(29) C(27) H(31) 109.5 no . . .
H(30) C(27) H(31) 109.5 no . . .
C(25) C(28) H(32) 109.5 no . . .
C(25) C(28) H(33) 109.5 no . . .
C(25) C(28) H(34) 109.5 no . . .
H(32) C(28) H(33) 109.5 no . . .
H(32) C(28) H(34) 109.5 no . . .
H(33) C(28) H(34) 109.5 no . . .
C(29) C(30) H(35) 109.5 no . . .
C(29) C(30) H(36) 109.5 no . . .
C(29) C(30) H(37) 109.5 no . . .
H(35) C(30) H(36) 109.5 no . . .
H(35) C(30) H(37) 109.5 no . . .
H(36) C(30) H(37) 109.5 no . . .
C(29) C(31) H(38) 109.5 no . . .
C(29) C(31) H(39) 109.5 no . . .
C(29) C(31) H(40) 109.5 no . . .
H(38) C(31) H(39) 109.5 no . . .
H(38) C(31) H(40) 109.5 no . . .
H(39) C(31) H(40) 109.5 no . . .
C(29) C(32) H(41) 109.5 no . . .
C(29) C(32) H(42) 109.5 no . . .
C(29) C(32) H(43) 109.5 no . . .
H(41) C(32) H(42) 109.5 no . . .
H(41) C(32) H(43) 109.5 no . . .
H(42) C(32) H(43) 109.5 no . . .
C(33) C(34) H(44) 109.5 no . . .
C(33) C(34) H(45) 109.5 no . . .
C(33) C(34) H(46) 109.5 no . . .
H(44) C(34) H(45) 109.5 no . . .
H(44) C(34) H(46) 109.5 no . . .
H(45) C(34) H(46) 109.5 no . . .
C(33) C(35) H(47) 109.5 no . . .
C(33) C(35) H(48) 109.5 no . . .
C(33) C(35) H(49) 109.5 no . . .
H(47) C(35) H(48) 109.5 no . . .
H(47) C(35) H(49) 109.5 no . . .
H(48) C(35) H(49) 109.5 no . . .
C(33) C(36) H(50) 109.5 no . . .
C(33) C(36) H(51) 109.5 no . . .
C(33) C(36) H(52) 109.5 no . . .
H(50) C(36) H(51) 109.5 no . . .
H(50) C(36) H(52) 109.5 no . . .
H(51) C(36) H(52) 109.5 no . . .
C(38) C(39) H(53) 117.7 no . . .
C(40) C(39) H(53) 117.7 no . . .
C(40) C(41) H(54) 120.4 no . . .
C(42) C(41) H(54) 120.4 no . . .
N(3) C(43) H(55) 117.7 no . . .
C(42) C(43) H(55) 117.7 no . . .
C(45) C(46) H(56) 116.9 no . . .
C(47) C(46) H(56) 116.9 no . . .
C(47) C(48) H(57) 117.8 no . . .
C(49) C(48) H(57) 117.7 no . . .
N(4) C(50) H(58) 116.9 no . . .
C(49) C(50) H(58) 116.9 no . . .
N(3) C(51) H(59) 108.4 no . . .
C(52) C(51) H(59) 108.4 no . . .
C(56) C(51) H(59) 108.4 no . . .
N(4) C(52) H(60) 108.5 no . . .
C(51) C(52) H(60) 108.5 no . . .
C(53) C(52) H(60) 108.5 no . . .
C(52) C(53) H(61) 109.6 no . . .
C(52) C(53) H(62) 109.6 no . . .
C(54) C(53) H(61) 109.6 no . . .
C(54) C(53) H(62) 109.6 no . . .
H(61) C(53) H(62) 108.1 no . . .
C(53) C(54) H(63) 109.1 no . . .
C(53) C(54) H(64) 109.1 no . . .
C(55) C(54) H(63) 109.1 no . . .
C(55) C(54) H(64) 109.1 no . . .
H(63) C(54) H(64) 107.8 no . . .
C(54) C(55) H(65) 109.6 no . . .
C(54) C(55) H(66) 109.6 no . . .
C(56) C(55) H(65) 109.6 no . . .
C(56) C(55) H(66) 109.6 no . . .
H(65) C(55) H(66) 108.1 no . . .
C(51) C(56) H(67) 109.7 no . . .
C(51) C(56) H(68) 109.7 no . . .
C(55) C(56) H(67) 109.7 no . . .
C(55) C(56) H(68) 109.7 no . . .
H(67) C(56) H(68) 108.2 no . . .
C(57) C(58) H(69) 109.5 no . . .
C(57) C(58) H(70) 109.5 no . . .
C(57) C(58) H(71) 109.5 no . . .
H(69) C(58) H(70) 109.5 no . . .
H(69) C(58) H(71) 109.5 no . . .
H(70) C(58) H(71) 109.5 no . . .
C(57) C(59) H(72) 109.5 no . . .
C(57) C(59) H(73) 109.5 no . . .
C(57) C(59) H(74) 109.5 no . . .
H(72) C(59) H(73) 109.5 no . . .
H(72) C(59) H(74) 109.5 no . . .
H(73) C(59) H(74) 109.5 no . . .
C(57) C(60) H(75) 109.5 no . . .
C(57) C(60) H(76) 109.5 no . . .
C(57) C(60) H(77) 109.5 no . . .
H(75) C(60) H(76) 109.5 no . . .
H(75) C(60) H(77) 109.5 no . . .
H(76) C(60) H(77) 109.5 no . . .
C(61) C(62) H(78) 109.5 no . . .
C(61) C(62) H(79) 109.5 no . . .
C(61) C(62) H(80) 109.5 no . . .
H(78) C(62) H(79) 109.5 no . . .
H(78) C(62) H(80) 109.5 no . . .
H(79) C(62) H(80) 109.5 no . . .
C(61) C(63) H(81) 109.5 no . . .
C(61) C(63) H(82) 109.5 no . . .
C(61) C(63) H(83) 109.5 no . . .
H(81) C(63) H(82) 109.5 no . . .
H(81) C(63) H(83) 109.5 no . . .
H(82) C(63) H(83) 109.5 no . . .
C(61) C(64) H(84) 109.5 no . . .
C(61) C(64) H(85) 109.5 no . . .
C(61) C(64) H(86) 109.5 no . . .
H(84) C(64) H(85) 109.5 no . . .
H(84) C(64) H(86) 109.5 no . . .
H(85) C(64) H(86) 109.5 no . . .
C(65) C(66) H(87) 109.5 no . . .
C(65) C(66) H(88) 109.5 no . . .
C(65) C(66) H(89) 109.5 no . . .
H(87) C(66) H(88) 109.5 no . . .
H(87) C(66) H(89) 109.5 no . . .
H(88) C(66) H(89) 109.5 no . . .
C(65) C(67) H(90) 109.5 no . . .
C(65) C(67) H(91) 109.5 no . . .
C(65) C(67) H(92) 109.5 no . . .
H(90) C(67) H(91) 109.5 no . . .
H(90) C(67) H(92) 109.5 no . . .
H(91) C(67) H(92) 109.5 no . . .
C(65) C(68) H(93) 109.5 no . . .
C(65) C(68) H(94) 109.5 no . . .
C(65) C(68) H(95) 109.5 no . . .
H(93) C(68) H(94) 109.5 no . . .
H(93) C(68) H(95) 109.5 no . . .
H(94) C(68) H(95) 109.5 no . . .
C(69) C(70) H(96) 109.5 no . . .
C(69) C(70) H(97) 109.5 no . . .
C(69) C(70) H(98) 109.5 no . . .
H(96) C(70) H(97) 109.5 no . . .
H(96) C(70) H(98) 109.5 no . . .
H(97) C(70) H(98) 109.5 no . . .
C(69) C(71) H(99) 109.5 no . . .
C(69) C(71) H(100) 109.5 no . . .
C(69) C(71) H(101) 109.5 no . . .
H(99) C(71) H(100) 109.5 no . . .
H(99) C(71) H(101) 109.5 no . . .
H(100) C(71) H(101) 109.5 no . . .
C(69) C(72) H(102) 109.5 no . . .
C(69) C(72) H(103) 109.5 no . . .
C(69) C(72) H(104) 109.5 no . . .
H(102) C(72) H(103) 109.5 no . . .
H(102) C(72) H(104) 109.5 no . . .
H(103) C(72) H(104) 109.5 no . . .
Cl(11) C(73) H(105) 108.6 no . . .
Cl(11) C(73) H(106) 108.7 no . . .
Cl(12) C(73) H(105) 108.7 no . . .
Cl(12) C(73) H(106) 108.6 no . . .
H(105) C(73) H(106) 107.6 no . . .
Cl(5) C(74) H(107) 108.9 no . . .
Cl(5) C(74) H(108) 108.9 no . . .
Cl(6) C(74) H(107) 108.9 no . . .
Cl(6) C(74) H(108) 108.9 no . . .
H(107) C(74) H(108) 107.7 no . . .
Cl(9) C(75) H(109) 109.1 no . . .
Cl(9) C(75) H(110) 109.1 no . . .
Cl(10) C(75) H(109) 109.1 no . . .
Cl(10) C(75) H(110) 109.1 no . . .
H(109) C(75) H(110) 107.8 no . . .
Cl(7) C(76) H(111) 109.4 no . . .
Cl(7) C(76) H(112) 109.4 no . . .
Cl(8) C(76) H(111) 109.4 no . . .
Cl(8) C(76) H(112) 109.4 no . . .
H(111) C(76) H(112) 108.0 no . . .

loop_
_geom_torsion_atom_site_label_1
_geom_torsion_atom_site_label_2
_geom_torsion_atom_site_label_3
_geom_torsion_atom_site_label_4
_geom_torsion
_geom_torsion_publ_flag
_geom_torsion_site_symmetry_1
_geom_torsion_site_symmetry_2
_geom_torsion_site_symmetry_3
_geom_torsion_site_symmetry_4
Cl(1) Mn(1) O(1) C(1) -104.8(7) ? . . . .
Cl(1) Mn(1) O(2) C(8) 97.3(7) ? . . . .
Cl(1) Mn(1) N(1) C(7) 94.6(7) ? . . . .
Cl(1) Mn(1) N(1) C(15) -96.3(5) ? . . . .
Cl(1) Mn(1) N(2) C(14) -100.4(7) ? . . . .
Cl(1) Mn(1) N(2) C(16) 77.2(5) ? . . . .
Cl(2) Mn(1) O(1) C(1) 74.3(7) ? . . . .
Cl(2) Mn(1) O(2) C(8) -79.9(7) ? . . . .
Cl(2) Mn(1) N(1) C(7) -88.2(7) ? . . . .
Cl(2) Mn(1) N(1) C(15) 80.9(5) ? . . . .
Cl(2) Mn(1) N(2) C(14) 80.2(7) ? . . . .
Cl(2) Mn(1) N(2) C(16) -102.2(5) ? . . . .
O(1) Mn(1) O(2) C(8) -170.6(7) ? . . . .
O(2) Mn(1) O(1) C(1) 164.0(7) ? . . . .
O(1) Mn(1) N(1) C(7) 2.5(8) ? . . . .
O(1) Mn(1) N(1) C(15) 171.5(5) ? . . . .
N(1) Mn(1) O(1) C(1) -12.0(8) ? . . . .
O(2) Mn(1) N(2) C(14) -9.4(8) ? . . . .
O(2) Mn(1) N(2) C(16) 168.2(5) ? . . . .
N(2) Mn(1) O(2) C(8) 10.6(8) ? . . . .
N(1) Mn(1) N(2) C(14) 166.4(8) ? . . . .
N(1) Mn(1) N(2) C(16) -15.9(5) ? . . . .
N(2) Mn(1) N(1) C(7) -179.1(8) ? . . . .
N(2) Mn(1) N(1) C(15) -10.1(5) ? . . . .
Cl(3) Mn(2) O(3) C(37) -56.2(8) ? . . . .
Cl(3) Mn(2) O(4) C(44) 102.0(7) ? . . . .
Cl(3) Mn(2) N(3) C(43) 68.0(7) ? . . . .
Cl(3) Mn(2) N(3) C(51) -104.7(5) ? . . . .
Cl(3) Mn(2) N(4) C(50) -101.2(7) ? . . . .
Cl(3) Mn(2) N(4) C(52) 75.9(5) ? . . . .
Cl(4) Mn(2) O(3) C(37) 121.2(7) ? . . . .
Cl(4) Mn(2) O(4) C(44) -75.3(7) ? . . . .
Cl(4) Mn(2) N(3) C(43) -114.3(7) ? . . . .
Cl(4) Mn(2) N(3) C(51) 72.9(5) ? . . . .
Cl(4) Mn(2) N(4) C(50) 81.1(7) ? . . . .
Cl(4) Mn(2) N(4) C(52) -101.9(5) ? . . . .
O(3) Mn(2) O(4) C(44) -168.0(7) ? . . . .
O(4) Mn(2) O(3) C(37) -146.7(8) ? . . . .
O(3) Mn(2) N(3) C(43) -21.9(7) ? . . . .
O(3) Mn(2) N(3) C(51) 165.3(5) ? . . . .
N(3) Mn(2) O(3) C(37) 33.7(8) ? . . . .
O(4) Mn(2) N(4) C(50) -10.8(8) ? . . . .
O(4) Mn(2) N(4) C(52) 166.3(5) ? . . . .
N(4) Mn(2) O(4) C(44) 14.6(7) ? . . . .
N(3) Mn(2) N(4) C(50) 168.6(8) ? . . . .
N(3) Mn(2) N(4) C(52) -14.3(5) ? . . . .
N(4) Mn(2) N(3) C(43) 155.5(7) ? . . . .
N(4) Mn(2) N(3) C(51) -17.3(5) ? . . . .
Mn(1) O(1) C(1) C(2) -165.4(6) ? . . . .
Mn(1) O(1) C(1) C(6) 14.3(13) ? . . . .
Mn(1) O(2) C(8) C(9) 175.6(6) ? . . . .
Mn(1) O(2) C(8) C(13) -7.5(13) ? . . . .
Mn(2) O(3) C(37) C(38) 155.4(7) ? . . . .
Mn(2) O(3) C(37) C(42) -30.0(13) ? . . . .
Mn(2) O(4) C(44) C(45) 171.1(6) ? . . . .
Mn(2) O(4) C(44) C(49) -12.2(11) ? . . . .
Mn(1) N(1) C(7) C(6) 5.0(14) ? . . . .
Mn(1) N(1) C(15) C(16) 33.1(9) ? . . . .
Mn(1) N(1) C(15) C(20) 157.1(6) ? . . . .
C(7) N(1) C(15) C(16) -157.3(9) ? . . . .
C(7) N(1) C(15) C(20) -33.3(11) ? . . . .
C(15) N(1) C(7) C(6) -163.3(9) ? . . . .
Mn(1) N(2) C(14) C(13) 5.7(14) ? . . . .
Mn(1) N(2) C(16) C(15) 37.8(9) ? . . . .
Mn(1) N(2) C(16) C(17) 164.2(6) ? . . . .
C(14) N(2) C(16) C(15) -144.5(9) ? . . . .
C(14) N(2) C(16) C(17) -18.1(12) ? . . . .
C(16) N(2) C(14) C(13) -171.7(8) ? . . . .
Mn(2) N(3) C(43) C(42) 8.0(12) ? . . . .
Mn(2) N(3) C(51) C(52) 42.4(7) ? . . . .
Mn(2) N(3) C(51) C(56) 165.2(6) ? . . . .
C(43) N(3) C(51) C(52) -130.5(8) ? . . . .
C(43) N(3) C(51) C(56) -7.7(12) ? . . . .
C(51) N(3) C(43) C(42) -179.9(6) ? . . . .
Mn(2) N(4) C(50) C(49) 5.5(13) ? . . . .
Mn(2) N(4) C(52) C(51) 40.8(8) ? . . . .
Mn(2) N(4) C(52) C(53) 162.0(6) ? . . . .
C(50) N(4) C(52) C(51) -142.1(9) ? . . . .
C(50) N(4) C(52) C(53) -20.8(12) ? . . . .
C(52) N(4) C(50) C(49) -171.2(8) ? . . . .
O(1) C(1) C(2) C(3) -179.7(6) ? . . . .
O(1) C(1) C(2) C(21) 2.0(13) ? . . . .
O(1) C(1) C(6) C(5) 178.8(8) ? . . . .
O(1) C(1) C(6) C(7) -4.1(14) ? . . . .
C(2) C(1) C(6) C(5) -1.5(14) ? . . . .
C(2) C(1) C(6) C(7) 175.6(9) ? . . . .
C(6) C(1) C(2) C(3) 0.7(11) ? . . . .
C(6) C(1) C(2) C(21) -177.7(9) ? . . . .
C(1) C(2) C(3) C(4) -1.3(14) ? . . . .
C(1) C(2) C(21) C(22) -177.2(9) ? . . . .
C(1) C(2) C(21) C(23) -58.0(15) ? . . . .
C(1) C(2) C(21) C(24) 61.6(12) ? . . . .
C(3) C(2) C(21) C(22) 4.5(13) ? . . . .
C(3) C(2) C(21) C(23) 123.7(12) ? . . . .
C(3) C(2) C(21) C(24) -116.7(12) ? . . . .
C(21) C(2) C(3) C(4) 177.1(9) ? . . . .
C(2) C(3) C(4) C(5) 2.6(14) ? . . . .
C(2) C(3) C(4) C(25) -178.6(8) ? . . . .
C(3) C(4) C(5) C(6) -3.4(13) ? . . . .
C(3) C(4) C(25) C(26) 25.6(12) ? . . . .
C(3) C(4) C(25) C(27) -90.4(12) ? . . . .
C(3) C(4) C(25) C(28) 144.9(9) ? . . . .
C(5) C(4) C(25) C(26) -155.6(9) ? . . . .
C(5) C(4) C(25) C(27) 88.3(12) ? . . . .
C(5) C(4) C(25) C(28) -36.3(12) ? . . . .
C(25) C(4) C(5) C(6) 177.7(8) ? . . . .
C(4) C(5) C(6) C(1) 3.1(15) ? . . . .
C(4) C(5) C(6) C(7) -174.1(9) ? . . . .
C(1) C(6) C(7) N(1) -5.7(16) ? . . . .
C(5) C(6) C(7) N(1) 171.5(9) ? . . . .
O(2) C(8) C(9) C(10) 177.0(8) ? . . . .
O(2) C(8) C(9) C(29) -5.0(12) ? . . . .
O(2) C(8) C(13) C(12) -177.6(8) ? . . . .
O(2) C(8) C(13) C(14) -0.6(12) ? . . . .
C(9) C(8) C(13) C(12) -0.6(13) ? . . . .
C(9) C(8) C(13) C(14) 176.4(8) ? . . . .
C(13) C(8) C(9) C(10) -0.2(9) ? . . . .
C(13) C(8) C(9) C(29) 177.9(8) ? . . . .
C(8) C(9) C(10) C(11) 0.1(10) ? . . . .
C(8) C(9) C(29) C(30) 59.5(11) ? . . . .
C(8) C(9) C(29) C(31) -62.7(12) ? . . . .
C(8) C(9) C(29) C(32) 177.4(8) ? . . . .
C(10) C(9) C(29) C(30) -122.4(10) ? . . . .
C(10) C(9) C(29) C(31) 115.3(10) ? . . . .
C(10) C(9) C(29) C(32) -4.6(12) ? . . . .
C(29) C(9) C(10) C(11) -177.9(8) ? . . . .
C(9) C(10) C(11) C(12) 0.7(13) ? . . . .
C(9) C(10) C(11) C(33) -175.9(8) ? . . . .
C(10) C(11) C(12) C(13) -1.4(13) ? . . . .
C(10) C(11) C(33) C(34) -32.2(12) ? . . . .
C(10) C(11) C(33) C(35) 86.6(12) ? . . . .
C(10) C(11) C(33) C(36) -154.5(9) ? . . . .
C(12) C(11) C(33) C(34) 151.5(9) ? . . . .
C(12) C(11) C(33) C(35) -89.8(11) ? . . . .
C(12) C(11) C(33) C(36) 29.1(13) ? . . . .
C(33) C(11) C(12) C(13) 175.2(9) ? . . . .
C(11) C(12) C(13) C(8) 1.5(14) ? . . . .
C(11) C(12) C(13) C(14) -175.6(8) ? . . . .
C(8) C(13) C(14) N(2) 1.0(15) ? . . . .
C(12) C(13) C(14) N(2) 178.2(9) ? . . . .
N(1) C(15) C(16) N(2) -44.2(10) ? . . . .
N(1) C(15) C(16) C(17) -172.3(8) ? . . . .
N(1) C(15) C(20) C(19) -179.3(7) ? . . . .
C(16) C(15) C(20) C(19) -57.2(9) ? . . . .
C(20) C(15) C(16) N(2) -171.5(8) ? . . . .
C(20) C(15) C(16) C(17) 60.4(12) ? . . . .
N(2) C(16) C(17) C(18) -179.7(6) ? . . . .
C(15) C(16) C(17) C(18) -56.2(11) ? . . . .
C(16) C(17) C(18) C(19) 54.2(11) ? . . . .
C(17) C(18) C(19) C(20) -56.3(13) ? . . . .
C(18) C(19) C(20) C(15) 56.7(11) ? . . . .
O(3) C(37) C(38) C(39) 178.0(9) ? . . . .
O(3) C(37) C(38) C(57) -6.3(13) ? . . . .
O(3) C(37) C(42) C(41) -177.3(8) ? . . . .
O(3) C(37) C(42) C(43) 4.4(14) ? . . . .
C(38) C(37) C(42) C(41) -2.5(14) ? . . . .
C(38) C(37) C(42) C(43) 179.3(8) ? . . . .
C(42) C(37) C(38) C(39) 3.1(13) ? . . . .
C(42) C(37) C(38) C(57) 178.9(8) ? . . . .
C(37) C(38) C(39) C(40) -0.4(11) ? . . . .
C(37) C(38) C(57) C(58) -179.7(7) ? . . . .
C(37) C(38) C(57) C(59) 62.2(14) ? . . . .
C(37) C(38) C(57) C(60) -62.1(11) ? . . . .
C(39) C(38) C(57) C(58) -4.1(12) ? . . . .
C(39) C(38) C(57) C(59) -122.2(12) ? . . . .
C(39) C(38) C(57) C(60) 113.5(12) ? . . . .
C(57) C(38) C(39) C(40) -176.0(9) ? . . . .
C(38) C(39) C(40) C(41) -3.1(15) ? . . . .
C(38) C(39) C(40) C(61) 179.5(9) ? . . . .
C(39) C(40) C(41) C(42) 3.7(14) ? . . . .
C(39) C(40) C(61) C(62) -28.3(14) ? . . . .
C(39) C(40) C(61) C(63) 95.4(11) ? . . . .
C(39) C(40) C(61) C(64) -146.0(10) ? . . . .
C(41) C(40) C(61) C(62) 154.4(9) ? . . . .
C(41) C(40) C(61) C(63) -81.9(12) ? . . . .
C(41) C(40) C(61) C(64) 36.8(13) ? . . . .
C(61) C(40) C(41) C(42) -179.0(8) ? . . . .
C(40) C(41) C(42) C(37) -1.0(14) ? . . . .
C(40) C(41) C(42) C(43) 177.4(8) ? . . . .
C(37) C(42) C(43) N(3) 5.7(14) ? . . . .
C(41) C(42) C(43) N(3) -172.7(8) ? . . . .
O(4) C(44) C(45) C(46) 179.6(7) ? . . . .
O(4) C(44) C(45) C(65) -0.5(10) ? . . . .
O(4) C(44) C(49) C(48) -179.8(6) ? . . . .
O(4) C(44) C(49) C(50) 1.4(13) ? . . . .
C(45) C(44) C(49) C(48) -3.1(12) ? . . . .
C(45) C(44) C(49) C(50) 178.1(8) ? . . . .
C(49) C(44) C(45) C(46) 2.9(12) ? . . . .
C(49) C(44) C(45) C(65) -177.2(7) ? . . . .
C(44) C(45) C(46) C(47) -1.4(14) ? . . . .
C(44) C(45) C(65) C(66) 65.1(12) ? . . . .
C(44) C(45) C(65) C(67) -58.3(10) ? . . . .
C(44) C(45) C(65) C(68) -178.5(8) ? . . . .
C(46) C(45) C(65) C(66) -115.0(11) ? . . . .
C(46) C(45) C(65) C(67) 121.6(10) ? . . . .
C(46) C(45) C(65) C(68) 1.4(12) ? . . . .
C(65) C(45) C(46) C(47) 178.8(8) ? . . . .
C(45) C(46) C(47) C(48) -0.1(11) ? . . . .
C(45) C(46) C(47) C(69) 179.6(8) ? . . . .
C(46) C(47) C(48) C(49) -0.1(10) ? . . . .
C(46) C(47) C(69) C(70) 35.8(12) ? . . . .
C(46) C(47) C(69) C(71) -84.7(12) ? . . . .
C(46) C(47) C(69) C(72) 156.6(9) ? . . . .
C(48) C(47) C(69) C(70) -144.6(9) ? . . . .
C(48) C(47) C(69) C(71) 94.9(11) ? . . . .
C(48) C(47) C(69) C(72) -23.8(12) ? . . . .
C(69) C(47) C(48) C(49) -179.7(7) ? . . . .
C(47) C(48) C(49) C(44) 1.7(13) ? . . . .
C(47) C(48) C(49) C(50) -179.4(8) ? . . . .
C(44) C(49) C(50) N(4) 1.4(14) ? . . . .
C(48) C(49) C(50) N(4) -177.5(8) ? . . . .
N(3) C(51) C(52) N(4) -51.5(9) ? . . . .
N(3) C(51) C(52) C(53) -177.2(6) ? . . . .
N(3) C(51) C(56) C(55) -176.5(7) ? . . . .
C(52) C(51) C(56) C(55) -58.3(10) ? . . . .
C(56) C(51) C(52) N(4) -177.5(8) ? . . . .
C(56) C(51) C(52) C(53) 56.8(10) ? . . . .
N(4) C(52) C(53) C(54) -173.7(7) ? . . . .
C(51) C(52) C(53) C(54) -54.7(8) ? . . . .
C(52) C(53) C(54) C(55) 56.2(10) ? . . . .
C(53) C(54) C(55) C(56) -57.4(10) ? . . . .
C(54) C(55) C(56) C(51) 57.2(9) ? . . . .

loop_
_geom_contact_atom_site_label_1
_geom_contact_atom_site_label_2
_geom_contact_distance
_geom_contact_publ_flag
_geom_contact_site_symmetry_1
_geom_contact_site_symmetry_2
Mn(1) C(1) 2.896(14) ? . .
Mn(1) C(6) 3.327(14) ? . .
Mn(1) C(7) 2.930(13) ? . .
Mn(1) C(8) 2.884(13) ? . .
Mn(1) C(13) 3.315(15) ? . .
Mn(1) C(14) 2.906(16) ? . .
Mn(1) C(15) 2.917(8) ? . .
Mn(1) C(16) 2.898(10) ? . .
Mn(2) C(37) 2.867(14) ? . .
Mn(2) C(42) 3.264(12) ? . .
Mn(2) C(43) 2.899(12) ? . .
Mn(2) C(44) 2.901(12) ? . .
Mn(2) C(49) 3.299(13) ? . .
Mn(2) C(50) 2.927(14) ? . .
Mn(2) C(51) 2.896(9) ? . .
Mn(2) C(52) 2.888(9) ? . .
Cl(1) O(1) 3.014(8) ? . .
Cl(1) O(2) 2.974(8) ? . .
Cl(1) N(1) 3.113(7) ? . .
Cl(1) N(2) 2.940(10) ? . .
Cl(1) C(16) 3.405(10) ? . .
Cl(2) Cl(5) 3.570(3) ? . .
Cl(2) O(1) 2.953(8) ? . .
Cl(2) O(2) 2.910(7) ? . .
Cl(2) N(1) 2.918(9) ? . .
Cl(2) N(2) 3.013(9) ? . .
Cl(2) C(1) 3.525(13) ? . .
Cl(2) C(7) 3.573(13) ? . .
Cl(2) C(8) 3.544(11) ? . .
Cl(2) C(14) 3.587(13) ? . .
Cl(2) C(15) 3.452(9) ? . .
Cl(2) C(48) 3.535(9) ? . .
Cl(2) C(50) 3.521(13) ? . .
Cl(2) C(74) 3.475(14) ? . .
Cl(3) O(3) 2.926(8) ? . .
Cl(3) O(4) 2.944(6) ? . .
Cl(3) N(3) 2.999(8) ? . .
Cl(3) N(4) 2.950(10) ? . .
Cl(3) C(12) 3.576(12) ? . .
Cl(3) C(37) 3.272(13) ? . .
Cl(3) C(42) 3.516(12) ? . .
Cl(3) C(43) 3.421(11) ? . .
Cl(3) C(52) 3.387(10) ? . .
Cl(3) C(73) 3.433(16) ? . .
Cl(4) O(3) 2.996(8) ? . .
Cl(4) O(4) 2.989(7) ? . .
Cl(4) N(3) 2.949(7) ? . .
Cl(4) N(4) 3.024(9) ? . .
Cl(4) C(44) 3.588(11) ? . .
Cl(4) C(51) 3.356(8) ? . .
Cl(5) Cl(2) 3.570(3) ? . .
Cl(5) Cl(6) 2.928(4) ? . .
Cl(5) C(27) 3.463(13) ? . 1_545
Cl(6) Cl(5) 2.928(4) ? . .
Cl(7) Cl(8) 2.907(7) ? . .
Cl(8) Cl(7) 2.907(7) ? . .
Cl(9) Cl(10) 2.907(7) ? . .
Cl(10) Cl(9) 2.907(7) ? . .
Cl(11) Cl(12) 2.924(4) ? . .
Cl(11) C(63) 3.500(14) ? . 1_565
Cl(12) Cl(11) 2.924(4) ? . .
O(1) Cl(1) 3.014(8) ? . .
O(1) Cl(2) 2.953(8) ? . .
O(1) O(2) 2.711(14) ? . .
O(1) N(1) 2.781(11) ? . .
O(1) C(2) 2.369(17) ? . .
O(1) C(3) 3.597(17) ? . .
O(1) C(6) 2.438(14) ? . .
O(1) C(7) 2.919(13) ? . .
O(1) C(21) 2.869(17) ? . .
O(1) C(23) 2.946(16) ? . .
O(1) C(24) 2.992(15) ? . .
O(2) Cl(1) 2.974(8) ? . .
O(2) Cl(2) 2.910(7) ? . .
O(2) O(1) 2.711(14) ? . .
O(2) N(2) 2.732(12) ? . .
O(2) C(9) 2.359(15) ? . .
O(2) C(13) 2.396(19) ? . .
O(2) C(14) 2.884(16) ? . .
O(2) C(29) 2.851(13) ? . .
O(2) C(30) 2.915(13) ? . .
O(2) C(31) 3.043(13) ? . .
O(3) Cl(3) 2.926(8) ? . .
O(3) Cl(4) 2.996(8) ? . .
O(3) O(4) 2.753(13) ? . .
O(3) N(3) 2.706(12) ? . .
O(3) C(38) 2.395(16) ? . .
O(3) C(42) 2.360(13) ? . .
O(3) C(43) 2.865(12) ? . .
O(3) C(57) 2.872(15) ? . .
O(3) C(59) 2.959(15) ? . .
O(3) C(60) 3.045(15) ? . .
O(4) Cl(3) 2.944(6) ? . .
O(4) Cl(4) 2.989(7) ? . .
O(4) O(3) 2.753(13) ? . .
O(4) N(4) 2.757(12) ? . .
O(4) C(45) 2.371(15) ? . .
O(4) C(49) 2.403(16) ? . .
O(4) C(50) 2.901(15) ? . .
O(4) C(65) 2.835(12) ? . .
O(4) C(66) 3.007(15) ? . .
O(4) C(67) 2.911(12) ? . .
N(1) Cl(1) 3.113(7) ? . .
N(1) Cl(2) 2.918(9) ? . .
N(1) O(1) 2.781(11) ? . .
N(1) N(2) 2.617(16) ? . .
N(1) C(1) 2.967(16) ? . .
N(1) C(6) 2.424(19) ? . .
N(1) C(16) 2.405(17) ? . .
N(1) C(20) 2.534(13) ? . .
N(2) Cl(1) 2.940(10) ? . .
N(2) Cl(2) 3.013(9) ? . .
N(2) O(2) 2.732(12) ? . .
N(2) N(1) 2.617(16) ? . .
N(2) C(8) 2.935(14) ? . .
N(2) C(13) 2.437(16) ? . .
N(2) C(15) 2.425(14) ? . .
N(2) C(17) 2.563(15) ? . .
N(3) Cl(3) 2.999(8) ? . .
N(3) Cl(4) 2.949(7) ? . .
N(3) O(3) 2.706(12) ? . .
N(3) N(4) 2.596(16) ? . .
N(3) C(37) 2.951(16) ? . .
N(3) C(42) 2.442(16) ? . .
N(3) C(52) 2.383(16) ? . .
N(3) C(56) 2.558(14) ? . .
N(4) Cl(3) 2.950(10) ? . .
N(4) Cl(4) 3.024(9) ? . .
N(4) O(4) 2.757(12) ? . .
N(4) N(3) 2.596(16) ? . .
N(4) C(44) 2.967(13) ? . .
N(4) C(49) 2.407(15) ? . .
N(4) C(51) 2.402(16) ? . .
N(4) C(53) 2.546(14) ? . .
C(1) Mn(1) 2.896(14) ? . .
C(1) Cl(2) 3.525(13) ? . .
C(1) N(1) 2.967(16) ? . .
C(1) C(3) 2.392(19) ? . .
C(1) C(4) 2.875(17) ? . .
C(1) C(5) 2.470(15) ? . .
C(1) C(7) 2.506(16) ? . .
C(1) C(21) 2.578(16) ? . .
C(1) C(23) 3.116(15) ? . .
C(1) C(24) 3.078(16) ? . .
C(2) O(1) 2.369(17) ? . .
C(2) C(4) 2.502(16) ? . .
C(2) C(5) 2.827(14) ? . .
C(2) C(6) 2.465(17) ? . .
C(2) C(22) 2.527(18) ? . .
C(2) C(23) 2.554(14) ? . .
C(2) C(24) 2.482(17) ? . .
C(3) O(1) 3.597(17) ? . .
C(3) C(1) 2.392(19) ? . .
C(3) C(5) 2.365(16) ? . .
C(3) C(6) 2.737(19) ? . .
C(3) C(21) 2.538(16) ? . .
C(3) C(22) 2.844(16) ? . .
C(3) C(24) 3.532(18) ? . .
C(3) C(25) 2.609(15) ? . .
C(3) C(26) 2.929(18) ? . .
C(3) C(27) 3.390(18) ? . .
C(4) C(1) 2.875(17) ? . .
C(4) C(2) 2.502(16) ? . .
C(4) C(6) 2.42(2) ? . .
C(4) C(26) 2.535(19) ? . .
C(4) C(27) 2.482(19) ? . .
C(4) C(28) 2.530(14) ? . .
C(5) C(1) 2.470(15) ? . .
C(5) C(2) 2.827(14) ? . .
C(5) C(3) 2.365(16) ? . .
C(5) C(7) 2.40(2) ? . .
C(5) C(25) 2.522(19) ? . .
C(5) C(27) 3.29(2) ? . .
C(5) C(28) 2.932(17) ? . .
C(6) Mn(1) 3.327(14) ? . .
C(6) O(1) 2.438(14) ? . .
C(6) N(1) 2.424(19) ? . .
C(6) C(2) 2.465(17) ? . .
C(6) C(3) 2.737(19) ? . .
C(6) C(4) 2.42(2) ? . .
C(7) Mn(1) 2.930(13) ? . .
C(7) Cl(2) 3.573(13) ? . .
C(7) O(1) 2.919(13) ? . .
C(7) C(1) 2.506(16) ? . .
C(7) C(5) 2.40(2) ? . .
C(7) C(15) 2.407(19) ? . .
C(7) C(16) 3.60(2) ? . .
C(7) C(20) 2.893(18) ? . .
C(8) Mn(1) 2.884(13) ? . .
C(8) Cl(2) 3.544(11) ? . .
C(8) N(2) 2.935(14) ? . .
C(8) C(10) 2.415(18) ? . .
C(8) C(11) 2.86(2) ? . .
C(8) C(12) 2.44(2) ? . .
C(8) C(14) 2.483(17) ? . .
C(8) C(29) 2.578(16) ? . .
C(8) C(30) 3.102(18) ? . .
C(8) C(31) 3.116(17) ? . .
C(9) O(2) 2.359(15) ? . .
C(9) C(11) 2.46(2) ? . .
C(9) C(12) 2.800(19) ? . .
C(9) C(13) 2.415(16) ? . .
C(9) C(30) 2.52(2) ? . .
C(9) C(31) 2.518(18) ? . .
C(9) C(32) 2.551(15) ? . .
C(10) C(8) 2.415(18) ? . .
C(10) C(12) 2.373(17) ? . .
C(10) C(13) 2.733(16) ? . .
C(10) C(29) 2.54(2) ? . .
C(10) C(31) 3.55(2) ? . .
C(10) C(32) 2.837(19) ? . .
C(10) C(33) 2.59(2) ? . .
C(10) C(34) 2.94(2) ? . .
C(10) C(35) 3.28(2) ? . .
C(11) C(8) 2.86(2) ? . .
C(11) C(9) 2.46(2) ? . .
C(11) C(13) 2.429(18) ? . .
C(11) C(34) 2.507(18) ? . .
C(11) C(35) 2.463(18) ? . .
C(11) C(36) 2.52(2) ? . .
C(12) Cl(3) 3.576(12) ? . .
C(12) C(8) 2.44(2) ? . .
C(12) C(9) 2.800(19) ? . .
C(12) C(10) 2.373(17) ? . .
C(12) C(14) 2.421(19) ? . .
C(12) C(33) 2.58(2) ? . .
C(12) C(35) 3.298(18) ? . .
C(12) C(36) 2.91(2) ? . .
C(13) Mn(1) 3.315(15) ? . .
C(13) O(2) 2.396(19) ? . .
C(13) N(2) 2.437(16) ? . .
C(13) C(9) 2.415(16) ? . .
C(13) C(10) 2.733(16) ? . .
C(13) C(11) 2.429(18) ? . .
C(14) Mn(1) 2.906(16) ? . .
C(14) Cl(2) 3.587(13) ? . .
C(14) O(2) 2.884(16) ? . .
C(14) C(8) 2.483(17) ? . .
C(14) C(12) 2.421(19) ? . .
C(14) C(15) 3.563(18) ? . .
C(14) C(16) 2.436(18) ? . .
C(14) C(17) 2.882(16) ? . .
C(15) Mn(1) 2.917(8) ? . .
C(15) Cl(2) 3.452(9) ? . .
C(15) N(2) 2.425(14) ? . .
C(15) C(7) 2.407(19) ? . .
C(15) C(14) 3.563(18) ? . .
C(15) C(17) 2.53(2) ? . .
C(15) C(18) 2.916(16) ? . .
C(15) C(19) 2.481(13) ? . .
C(16) Mn(1) 2.898(10) ? . .
C(16) Cl(1) 3.405(10) ? . .
C(16) N(1) 2.405(17) ? . .
C(16) C(7) 3.60(2) ? . .
C(16) C(14) 2.436(18) ? . .
C(16) C(18) 2.486(14) ? . .
C(16) C(19) 2.879(13) ? . .
C(16) C(20) 2.482(17) ? . .
C(17) N(2) 2.563(15) ? . .
C(17) C(14) 2.882(16) ? . .
C(17) C(15) 2.53(2) ? . .
C(17) C(19) 2.512(19) ? . .
C(17) C(20) 2.99(2) ? . .
C(18) C(15) 2.916(16) ? . .
C(18) C(16) 2.486(14) ? . .
C(18) C(20) 2.52(2) ? . .
C(19) C(15) 2.481(13) ? . .
C(19) C(16) 2.879(13) ? . .
C(19) C(17) 2.512(19) ? . .
C(20) N(1) 2.534(13) ? . .
C(20) C(7) 2.893(18) ? . .
C(20) C(16) 2.482(17) ? . .
C(20) C(17) 2.99(2) ? . .
C(20) C(18) 2.52(2) ? . .
C(21) O(1) 2.869(17) ? . .
C(21) C(1) 2.578(16) ? . .
C(21) C(3) 2.538(16) ? . .
C(22) C(2) 2.527(18) ? . .
C(22) C(3) 2.844(16) ? . .
C(22) C(23) 2.467(19) ? . .
C(22) C(24) 2.47(2) ? . .
C(23) O(1) 2.946(16) ? . .
C(23) C(1) 3.116(15) ? . .
C(23) C(2) 2.554(14) ? . .
C(23) C(22) 2.467(19) ? . .
C(23) C(24) 2.539(15) ? . .
C(23) C(76) 3.593(17) ? . 1_465
C(24) O(1) 2.992(15) ? . .
C(24) C(1) 3.078(16) ? . .
C(24) C(2) 2.482(17) ? . .
C(24) C(3) 3.532(18) ? . .
C(24) C(22) 2.47(2) ? . .
C(24) C(23) 2.539(15) ? . .
C(25) C(3) 2.609(15) ? . .
C(25) C(5) 2.522(19) ? . .
C(26) C(3) 2.929(18) ? . .
C(26) C(4) 2.535(19) ? . .
C(26) C(27) 2.445(16) ? . .
C(26) C(28) 2.486(19) ? . .
C(27) Cl(5) 3.463(13) ? . 1_565
C(27) C(3) 3.390(18) ? . .
C(27) C(4) 2.482(19) ? . .
C(27) C(5) 3.29(2) ? . .
C(27) C(26) 2.445(16) ? . .
C(27) C(28) 2.488(16) ? . .
C(28) C(4) 2.530(14) ? . .
C(28) C(5) 2.932(17) ? . .
C(28) C(26) 2.486(19) ? . .
C(28) C(27) 2.488(16) ? . .
C(29) O(2) 2.851(13) ? . .
C(29) C(8) 2.578(16) ? . .
C(29) C(10) 2.54(2) ? . .
C(30) O(2) 2.915(13) ? . .
C(30) C(8) 3.102(18) ? . .
C(30) C(9) 2.52(2) ? . .
C(30) C(31) 2.544(14) ? . .
C(30) C(32) 2.45(2) ? . .
C(31) O(2) 3.043(13) ? . .
C(31) C(8) 3.116(17) ? . .
C(31) C(9) 2.518(18) ? . .
C(31) C(10) 3.55(2) ? . .
C(31) C(30) 2.544(14) ? . .
C(31) C(32) 2.497(17) ? . .
C(32) C(9) 2.551(15) ? . .
C(32) C(10) 2.837(19) ? . .
C(32) C(30) 2.45(2) ? . .
C(32) C(31) 2.497(17) ? . .
C(33) C(10) 2.59(2) ? . .
C(33) C(12) 2.58(2) ? . .
C(34) C(10) 2.94(2) ? . .
C(34) C(11) 2.507(18) ? . .
C(34) C(35) 2.462(16) ? . .
C(34) C(36) 2.419(17) ? . .
C(35) C(10) 3.28(2) ? . .
C(35) C(11) 2.463(18) ? . .
C(35) C(12) 3.298(18) ? . .
C(35) C(34) 2.462(16) ? . .
C(35) C(36) 2.473(16) ? . .
C(36) C(11) 2.52(2) ? . .
C(36) C(12) 2.91(2) ? . .
C(36) C(34) 2.419(17) ? . .
C(36) C(35) 2.473(16) ? . .
C(37) Mn(2) 2.867(14) ? . .
C(37) Cl(3) 3.272(13) ? . .
C(37) N(3) 2.951(16) ? . .
C(37) C(39) 2.40(2) ? . .
C(37) C(40) 2.840(18) ? . .
C(37) C(41) 2.458(16) ? . .
C(37) C(43) 2.492(15) ? . .
C(37) C(57) 2.567(15) ? . .
C(37) C(59) 3.102(14) ? . .
C(37) C(60) 3.081(16) ? . .
C(38) O(3) 2.395(16) ? . .
C(38) C(40) 2.443(15) ? . .
C(38) C(41) 2.803(14) ? . .
C(38) C(42) 2.394(15) ? . .
C(38) C(58) 2.549(16) ? . .
C(38) C(59) 2.518(13) ? . .
C(38) C(60) 2.503(17) ? . .
C(39) C(37) 2.40(2) ? . .
C(39) C(41) 2.369(16) ? . .
C(39) C(42) 2.719(18) ? . .
C(39) C(57) 2.557(16) ? . .
C(39) C(58) 2.829(15) ? . .
C(39) C(60) 3.525(19) ? . .
C(39) C(61) 2.571(17) ? . .
C(39) C(62) 2.916(18) ? . .
C(39) C(63) 3.388(18) ? . .
C(40) C(37) 2.840(18) ? . .
C(40) C(38) 2.443(15) ? . .
C(40) C(42) 2.425(19) ? . .
C(40) C(62) 2.536(19) ? . .
C(40) C(63) 2.50(2) ? . .
C(40) C(64) 2.524(15) ? . .
C(41) C(37) 2.458(16) ? . .
C(41) C(38) 2.803(14) ? . .
C(41) C(39) 2.369(16) ? . .
C(41) C(43) 2.431(19) ? . .
C(41) C(61) 2.56(2) ? . .
C(41) C(63) 3.25(2) ? . .
C(41) C(64) 2.914(17) ? . .
C(42) Mn(2) 3.264(12) ? . .
C(42) Cl(3) 3.516(12) ? . .
C(42) O(3) 2.360(13) ? . .
C(42) N(3) 2.442(16) ? . .
C(42) C(38) 2.394(15) ? . .
C(42) C(39) 2.719(18) ? . .
C(42) C(40) 2.425(19) ? . .
C(43) Mn(2) 2.899(12) ? . .
C(43) Cl(3) 3.421(11) ? . .
C(43) O(3) 2.865(12) ? . .
C(43) C(37) 2.492(15) ? . .
C(43) C(41) 2.431(19) ? . .
C(43) C(51) 2.449(18) ? . .
C(43) C(52) 3.476(18) ? . .
C(43) C(56) 2.884(18) ? . .
C(44) Mn(2) 2.901(12) ? . .
C(44) Cl(4) 3.588(11) ? . .
C(44) N(4) 2.967(13) ? . .
C(44) C(46) 2.394(17) ? . .
C(44) C(47) 2.880(19) ? . .
C(44) C(48) 2.439(19) ? . .
C(44) C(50) 2.501(15) ? . .
C(44) C(65) 2.555(15) ? . .
C(44) C(66) 3.100(17) ? . .
C(44) C(67) 3.064(16) ? . .
C(45) O(4) 2.371(15) ? . .
C(45) C(47) 2.504(19) ? . .
C(45) C(48) 2.806(17) ? . .
C(45) C(49) 2.465(15) ? . .
C(45) C(66) 2.486(18) ? . .
C(45) C(67) 2.513(18) ? . .
C(45) C(68) 2.552(16) ? . .
C(46) C(44) 2.394(17) ? . .
C(46) C(48) 2.362(14) ? . .
C(46) C(49) 2.763(14) ? . .
C(46) C(65) 2.55(2) ? . .
C(46) C(66) 3.54(2) ? . .
C(46) C(68) 2.852(18) ? . .
C(46) C(69) 2.589(19) ? . .
C(46) C(70) 2.98(2) ? . .
C(46) C(71) 3.29(2) ? . .
C(47) C(44) 2.880(19) ? . .
C(47) C(45) 2.504(19) ? . .
C(47) C(49) 2.471(17) ? . .
C(47) C(70) 2.52(2) ? . .
C(47) C(71) 2.467(17) ? . .
C(47) C(72) 2.53(2) ? . .
C(48) Cl(2) 3.535(9) ? . .
C(48) C(44) 2.439(19) ? . .
C(48) C(45) 2.806(17) ? . .
C(48) C(46) 2.362(14) ? . .
C(48) C(50) 2.400(17) ? . .
C(48) C(69) 2.572(17) ? . .
C(48) C(71) 3.369(17) ? . .
C(48) C(72) 2.94(2) ? . .
C(49) Mn(2) 3.299(13) ? . .
C(49) O(4) 2.403(16) ? . .
C(49) N(4) 2.407(15) ? . .
C(49) C(45) 2.465(15) ? . .
C(49) C(46) 2.763(14) ? . .
C(49) C(47) 2.471(17) ? . .
C(50) Mn(2) 2.927(14) ? . .
C(50) Cl(2) 3.521(13) ? . .
C(50) O(4) 2.901(15) ? . .
C(50) C(44) 2.501(15) ? . .
C(50) C(48) 2.400(17) ? . .
C(50) C(51) 3.557(17) ? . .
C(50) C(52) 2.432(15) ? . .
C(50) C(53) 2.898(14) ? . .
C(51) Mn(2) 2.896(9) ? . .
C(51) Cl(4) 3.356(8) ? . .
C(51) N(4) 2.402(16) ? . .
C(51) C(43) 2.449(18) ? . .
C(51) C(50) 3.557(17) ? . .
C(51) C(53) 2.509(18) ? . .
C(51) C(54) 2.884(15) ? . .
C(51) C(55) 2.465(13) ? . .
C(52) Mn(2) 2.888(9) ? . .
C(52) Cl(3) 3.387(10) ? . .
C(52) N(3) 2.383(16) ? . .
C(52) C(43) 3.476(18) ? . .
C(52) C(50) 2.432(15) ? . .
C(52) C(54) 2.487(12) ? . .
C(52) C(55) 2.943(13) ? . .
C(52) C(56) 2.534(17) ? . .
C(53) N(4) 2.546(14) ? . .
C(53) C(50) 2.898(14) ? . .
C(53) C(51) 2.509(18) ? . .
C(53) C(55) 2.519(17) ? . .
C(53) C(56) 2.95(2) ? . .
C(54) C(51) 2.884(15) ? . .
C(54) C(52) 2.487(12) ? . .
C(54) C(56) 2.480(19) ? . .
C(55) C(51) 2.465(13) ? . .
C(55) C(52) 2.943(13) ? . .
C(55) C(53) 2.519(17) ? . .
C(56) N(3) 2.558(14) ? . .
C(56) C(43) 2.884(18) ? . .
C(56) C(52) 2.534(17) ? . .
C(56) C(53) 2.95(2) ? . .
C(56) C(54) 2.480(19) ? . .
C(57) O(3) 2.872(15) ? . .
C(57) C(37) 2.567(15) ? . .
C(57) C(39) 2.557(16) ? . .
C(58) C(38) 2.549(16) ? . .
C(58) C(39) 2.829(15) ? . .
C(58) C(59) 2.460(19) ? . .
C(58) C(60) 2.46(2) ? . .
C(59) O(3) 2.959(15) ? . .
C(59) C(37) 3.102(14) ? . .
C(59) C(38) 2.518(13) ? . .
C(59) C(58) 2.460(19) ? . .
C(59) C(60) 2.493(15) ? . .
C(60) O(3) 3.045(15) ? . .
C(60) C(37) 3.081(16) ? . .
C(60) C(38) 2.503(17) ? . .
C(60) C(39) 3.525(19) ? . .
C(60) C(58) 2.46(2) ? . .
C(60) C(59) 2.493(15) ? . .
C(61) C(39) 2.571(17) ? . .
C(61) C(41) 2.56(2) ? . .
C(62) C(39) 2.916(18) ? . .
C(62) C(40) 2.536(19) ? . .
C(62) C(63) 2.536(16) ? . .
C(62) C(64) 2.445(17) ? . .
C(63) Cl(11) 3.500(14) ? . 1_545
C(63) C(39) 3.388(18) ? . .
C(63) C(40) 2.50(2) ? . .
C(63) C(41) 3.25(2) ? . .
C(63) C(62) 2.536(16) ? . .
C(63) C(64) 2.515(16) ? . .
C(64) C(40) 2.524(15) ? . .
C(64) C(41) 2.914(17) ? . .
C(64) C(62) 2.445(17) ? . .
C(64) C(63) 2.515(16) ? . .
C(65) O(4) 2.835(12) ? . .
C(65) C(44) 2.555(15) ? . .
C(65) C(46) 2.55(2) ? . .
C(66) O(4) 3.007(15) ? . .
C(66) C(44) 3.100(17) ? . .
C(66) C(45) 2.486(18) ? . .
C(66) C(46) 3.54(2) ? . .
C(66) C(67) 2.518(14) ? . .
C(66) C(68) 2.450(17) ? . .
C(67) O(4) 2.911(12) ? . .
C(67) C(44) 3.064(16) ? . .
C(67) C(45) 2.513(18) ? . .
C(67) C(66) 2.518(14) ? . .
C(67) C(68) 2.51(2) ? . .
C(68) C(45) 2.552(16) ? . .
C(68) C(46) 2.852(18) ? . .
C(68) C(66) 2.450(17) ? . .
C(68) C(67) 2.51(2) ? . .
C(69) C(46) 2.589(19) ? . .
C(69) C(48) 2.572(17) ? . .
C(70) C(46) 2.98(2) ? . .
C(70) C(47) 2.52(2) ? . .
C(70) C(71) 2.518(19) ? . .
C(70) C(72) 2.43(2) ? . .
C(71) C(46) 3.29(2) ? . .
C(71) C(47) 2.467(17) ? . .
C(71) C(48) 3.369(17) ? . .
C(71) C(70) 2.518(19) ? . .
C(71) C(72) 2.509(18) ? . .
C(72) C(47) 2.53(2) ? . .
C(72) C(48) 2.94(2) ? . .
C(72) C(70) 2.43(2) ? . .
C(72) C(71) 2.509(18) ? . .
C(73) Cl(3) 3.433(16) ? . .
C(74) Cl(2) 3.475(14) ? . .
C(76) C(23) 3.593(17) ? . 1_645
Mn(1) H(7) 3.230 ? . .
Mn(1) H(8) 3.150 ? . .
Mn(2) H(59) 3.125 ? . .
Mn(2) H(60) 3.142 ? . .
Mn(2) H(77) 3.540 ? . .
Mn(2) H(92) 3.573 ? . .
Cl(1) H(8) 2.935 ? . .
Cl(1) H(27) 3.530 ? . 1_455
Cl(1) H(54) 3.133 ? . 1_565
Cl(1) H(55) 2.794 ? . 1_565
Cl(1) H(68) 2.941 ? . 1_565
Cl(1) H(112) 2.893 ? . 1_465
Cl(2) H(7) 3.063 ? . .
Cl(2) H(40) 3.421 ? . .
Cl(2) H(57) 2.871 ? . .
Cl(2) H(58) 2.817 ? . .
Cl(2) H(62) 3.179 ? . .
Cl(2) H(104) 3.209 ? . .
Cl(2) H(107) 2.673 ? . .
Cl(3) H(5) 2.835 ? . .
Cl(3) H(6) 3.287 ? . .
Cl(3) H(50) 3.600 ? . .
Cl(3) H(52) 2.931 ? . .
Cl(3) H(60) 2.926 ? . .
Cl(3) H(77) 3.101 ? . .
Cl(3) H(105) 2.690 ? . .
Cl(4) H(2) 3.254 ? . 1_545
Cl(4) H(3) 3.167 ? . 1_545
Cl(4) H(15) 3.593 ? . 1_545
Cl(4) H(59) 2.862 ? . .
Cl(4) H(79) 3.434 ? . 1_655
Cl(4) H(85) 3.315 ? . 1_655
Cl(4) H(92) 3.440 ? . .
Cl(4) H(110) 2.966 ? . 1_554
Cl(5) H(29) 3.170 ? . 1_545
Cl(5) H(30) 3.191 ? . 1_545
Cl(5) H(31) 3.459 ? . 1_545
Cl(5) H(45) 3.228 ? . 1_655
Cl(5) H(48) 3.307 ? . 1_655
Cl(5) H(51) 3.250 ? . 1_655
Cl(5) H(57) 3.301 ? . .
Cl(5) H(58) 3.094 ? . .
Cl(5) H(61) 3.183 ? . .
Cl(5) H(62) 3.535 ? . .
Cl(5) H(86) 3.354 ? . 1_655
Cl(5) H(107) 2.237 ? . .
Cl(5) H(108) 2.237 ? . .
Cl(6) H(31) 3.322 ? . 1_545
Cl(6) H(38) 3.430 ? . .
Cl(6) H(61) 3.423 ? . .
Cl(6) H(64) 2.992 ? . .
Cl(6) H(73) 3.380 ? . 1_556
Cl(6) H(76) 3.301 ? . 1_556
Cl(6) H(91) 3.046 ? . 1_556
Cl(6) H(107) 2.308 ? . .
Cl(6) H(108) 2.308 ? . .
Cl(7) H(26) 3.148 ? . 1_545
Cl(7) H(30) 2.954 ? . 1_545
Cl(7) H(45) 3.553 ? . 1_655
Cl(7) H(90) 3.216 ? . 1_556
Cl(7) H(91) 3.549 ? . 1_556
Cl(7) H(109) 3.236 ? . .
Cl(7) H(111) 2.291 ? . .
Cl(7) H(112) 2.291 ? . .
Cl(8) H(20) 3.286 ? . 1_645
Cl(8) H(22) 3.463 ? . 1_645
Cl(8) H(44) 3.428 ? . 1_655
Cl(8) H(46) 3.509 ? . 1_655
Cl(8) H(66) 3.163 ? . 1_655
Cl(8) H(69) 3.520 ? . 1_656
Cl(8) H(71) 3.185 ? . 1_656
Cl(8) H(80) 3.482 ? . 1_656
Cl(8) H(90) 3.159 ? . 1_556
Cl(8) H(111) 2.286 ? . .
Cl(8) H(112) 2.286 ? . .
Cl(9) H(13) 3.061 ? . 1_546
Cl(9) H(19) 3.313 ? . 1_545
Cl(9) H(26) 3.504 ? . 1_545
Cl(9) H(36) 3.450 ? . 1_645
Cl(9) H(37) 3.570 ? . 1_645
Cl(9) H(41) 3.283 ? . 1_645
Cl(9) H(74) 3.226 ? . 1_556
Cl(9) H(98) 3.353 ? . 1_546
Cl(9) H(109) 2.283 ? . .
Cl(9) H(110) 2.283 ? . .
Cl(10) H(36) 2.991 ? . 1_645
Cl(10) H(79) 3.019 ? . 1_656
Cl(10) H(81) 3.103 ? . 1_656
Cl(10) H(97) 3.432 ? . 1_546
Cl(10) H(109) 2.265 ? . .
Cl(10) H(110) 2.265 ? . .
Cl(10) H(111) 3.266 ? . .
Cl(11) H(5) 3.376 ? . .
Cl(11) H(6) 3.056 ? . .
Cl(11) H(9) 2.802 ? . .
Cl(11) H(34) 3.490 ? . 1_455
Cl(11) H(81) 3.290 ? . 1_565
Cl(11) H(82) 3.154 ? . 1_565
Cl(11) H(83) 3.482 ? . 1_565
Cl(11) H(97) 3.083 ? . 1_455
Cl(11) H(100) 3.301 ? . 1_455
Cl(11) H(103) 3.090 ? . 1_455
Cl(11) H(105) 2.312 ? . .
Cl(11) H(106) 2.312 ? . .
Cl(12) H(9) 3.222 ? . .
Cl(12) H(11) 2.937 ? . .
Cl(12) H(21) 3.059 ? . 1_554
Cl(12) H(36) 3.248 ? . 1_554
Cl(12) H(39) 3.224 ? . 1_554
Cl(12) H(81) 3.317 ? . 1_565
Cl(12) H(89) 3.345 ? . .
Cl(12) H(105) 2.206 ? . .
Cl(12) H(106) 2.206 ? . .
O(1) H(21) 3.395 ? . .
O(1) H(22) 2.296 ? . .
O(1) H(23) 2.590 ? . .
O(1) H(25) 3.074 ? . .
O(1) H(35) 3.473 ? . .
O(1) H(68) 3.186 ? . 1_565
O(2) H(23) 3.396 ? . .
O(2) H(27) 3.348 ? . 1_455
O(2) H(35) 2.523 ? . .
O(2) H(37) 2.962 ? . .
O(2) H(39) 3.457 ? . .
O(2) H(40) 2.457 ? . .
O(3) H(16) 3.229 ? . 1_545
O(3) H(72) 2.555 ? . .
O(3) H(74) 3.022 ? . .
O(3) H(76) 3.450 ? . .
O(3) H(77) 2.448 ? . .
O(3) H(92) 3.564 ? . .
O(3) H(110) 3.576 ? . 1_554
O(4) H(77) 3.418 ? . .
O(4) H(87) 2.597 ? . .
O(4) H(89) 3.133 ? . .
O(4) H(91) 3.352 ? . .
O(4) H(92) 2.264 ? . .
N(1) H(3) 1.914 ? . .
N(1) H(7) 2.021 ? . .
N(1) H(8) 2.649 ? . .
N(1) H(15) 2.765 ? . .
N(1) H(16) 2.756 ? . .
N(1) H(102) 3.277 ? . .
N(2) H(6) 1.905 ? . .
N(2) H(7) 2.679 ? . .
N(2) H(8) 2.037 ? . .
N(2) H(9) 2.788 ? . .
N(2) H(10) 2.783 ? . .
N(3) H(16) 3.571 ? . 1_545
N(3) H(52) 3.309 ? . .
N(3) H(55) 1.931 ? . .
N(3) H(59) 2.043 ? . .
N(3) H(60) 2.587 ? . .
N(3) H(67) 2.753 ? . .
N(3) H(68) 2.801 ? . .
N(4) H(58) 1.921 ? . .
N(4) H(59) 2.603 ? . .
N(4) H(60) 2.026 ? . .
N(4) H(61) 2.724 ? . .
N(4) H(62) 2.808 ? . .
C(1) H(1) 3.243 ? . .
C(1) H(2) 3.320 ? . .
C(1) H(3) 3.335 ? . .
C(1) H(22) 2.663 ? . .
C(1) H(23) 3.098 ? . .
C(1) H(25) 2.959 ? . .
C(1) H(65) 3.270 ? . 1_565
C(1) H(68) 3.031 ? . 1_565
C(2) H(1) 1.996 ? . .
C(2) H(17) 2.949 ? . .
C(2) H(18) 3.314 ? . .
C(2) H(19) 2.543 ? . .
C(2) H(20) 2.980 ? . .
C(2) H(21) 3.340 ? . .
C(2) H(22) 2.559 ? . .
C(2) H(23) 2.908 ? . .
C(2) H(24) 3.280 ? . .
C(2) H(25) 2.468 ? . .
C(2) H(47) 3.553 ? . 1_655
C(2) H(65) 3.107 ? . 1_565
C(3) H(2) 3.233 ? . .
C(3) H(17) 3.113 ? . .
C(3) H(19) 2.440 ? . .
C(3) H(25) 3.331 ? . .
C(3) H(26) 3.077 ? . .
C(3) H(28) 2.611 ? . .
C(3) H(31) 3.063 ? . .
C(3) H(47) 3.416 ? . 1_655
C(3) H(49) 3.245 ? . 1_655
C(3) H(65) 3.014 ? . 1_565
C(4) H(1) 2.046 ? . .
C(4) H(2) 2.005 ? . .
C(4) H(26) 2.958 ? . .
C(4) H(27) 3.324 ? . .
C(4) H(28) 2.541 ? . .
C(4) H(29) 2.907 ? . .
C(4) H(30) 3.277 ? . .
C(4) H(31) 2.481 ? . .
C(4) H(32) 2.957 ? . .
C(4) H(33) 3.315 ? . .
C(4) H(34) 2.545 ? . .
C(4) H(49) 3.015 ? . 1_655
C(4) H(65) 3.179 ? . 1_565
C(5) H(1) 3.214 ? . .
C(5) H(3) 2.517 ? . .
C(5) H(29) 3.330 ? . .
C(5) H(31) 3.310 ? . .
C(5) H(32) 3.439 ? . .
C(5) H(34) 2.452 ? . .
C(5) H(49) 3.365 ? . 1_655
C(5) H(59) 2.926 ? . 1_565
C(5) H(65) 3.286 ? . 1_565
C(6) H(2) 2.025 ? . .
C(6) H(3) 2.026 ? . .
C(6) H(59) 3.086 ? . 1_565
C(6) H(65) 3.362 ? . 1_565
C(6) H(68) 3.032 ? . 1_565
C(6) H(102) 3.558 ? . .
C(7) H(2) 2.538 ? . .
C(7) H(7) 2.825 ? . .
C(7) H(15) 2.705 ? . .
C(7) H(16) 3.033 ? . .
C(7) H(59) 3.319 ? . 1_565
C(7) H(68) 3.285 ? . 1_565
C(7) H(102) 2.901 ? . .
C(8) H(4) 3.266 ? . .
C(8) H(5) 3.289 ? . .
C(8) H(6) 3.312 ? . .
C(8) H(27) 2.967 ? . 1_455
C(8) H(32) 3.559 ? . 1_455
C(8) H(35) 3.122 ? . .
C(8) H(37) 2.993 ? . .
C(8) H(40) 2.664 ? . .
C(8) H(62) 3.449 ? . .
C(9) H(4) 2.010 ? . .
C(9) H(27) 3.145 ? . 1_455
C(9) H(28) 3.326 ? . 1_455
C(9) H(35) 2.942 ? . .
C(9) H(36) 3.314 ? . .
C(9) H(37) 2.522 ? . .
C(9) H(38) 2.938 ? . .
C(9) H(39) 3.313 ? . .
C(9) H(40) 2.514 ? . .
C(9) H(41) 2.978 ? . .
C(9) H(42) 3.335 ? . .
C(9) H(43) 2.562 ? . .
C(9) H(63) 3.270 ? . .
C(10) H(5) 3.239 ? . .
C(10) H(27) 3.550 ? . 1_455
C(10) H(28) 3.150 ? . 1_455
C(10) H(37) 3.456 ? . .
C(10) H(41) 3.171 ? . .
C(10) H(43) 2.388 ? . .
C(10) H(44) 3.432 ? . .
C(10) H(46) 2.429 ? . .
C(10) H(47) 3.319 ? . .
C(10) H(49) 3.243 ? . .
C(10) H(63) 2.936 ? . .
C(11) H(4) 2.023 ? . .
C(11) H(5) 2.041 ? . .
C(11) H(28) 3.406 ? . 1_455
C(11) H(32) 3.470 ? . 1_455
C(11) H(44) 2.939 ? . .
C(11) H(45) 3.297 ? . .
C(11) H(46) 2.499 ? . .
C(11) H(47) 2.892 ? . .
C(11) H(48) 3.266 ? . .
C(11) H(49) 2.424 ? . .
C(11) H(50) 2.932 ? . .
C(11) H(51) 3.314 ? . .
C(11) H(52) 2.521 ? . .
C(11) H(60) 3.177 ? . .
C(11) H(63) 3.251 ? . .
C(12) H(4) 3.229 ? . .
C(12) H(6) 2.539 ? . .
C(12) H(32) 2.821 ? . 1_455
C(12) H(49) 2.935 ? . .
C(12) H(50) 3.026 ? . .
C(12) H(52) 2.626 ? . .
C(12) H(60) 2.834 ? . .
C(13) H(5) 2.032 ? . .
C(13) H(6) 2.065 ? . .
C(13) H(27) 3.249 ? . 1_455
C(13) H(32) 2.859 ? . 1_455
C(13) H(60) 3.260 ? . .
C(13) H(62) 3.588 ? . .
C(14) H(5) 2.555 ? . .
C(14) H(8) 2.934 ? . .
C(14) H(9) 2.748 ? . .
C(14) H(10) 2.931 ? . .
C(14) H(32) 3.073 ? . 1_455
C(15) H(3) 2.520 ? . .
C(15) H(8) 2.042 ? . .
C(15) H(9) 3.373 ? . .
C(15) H(10) 2.767 ? . .
C(15) H(12) 3.284 ? . .
C(15) H(13) 3.336 ? . .
C(15) H(14) 2.700 ? . .
C(15) H(15) 2.070 ? . .
C(15) H(16) 2.070 ? . .
C(15) H(102) 3.229 ? . .
C(16) H(6) 2.546 ? . .
C(16) H(7) 2.049 ? . .
C(16) H(9) 2.083 ? . .
C(16) H(10) 2.084 ? . .
C(16) H(11) 3.343 ? . .
C(16) H(12) 2.722 ? . .
C(16) H(14) 3.236 ? . .
C(16) H(15) 3.340 ? . .
C(16) H(16) 2.709 ? . .
C(16) H(83) 3.122 ? . 1_565
C(17) H(6) 2.448 ? . .
C(17) H(7) 2.680 ? . .
C(17) H(8) 2.053 ? . .
C(17) H(11) 2.095 ? . .
C(17) H(12) 2.095 ? . .
C(17) H(13) 3.362 ? . .
C(17) H(14) 2.736 ? . .
C(17) H(16) 3.341 ? . .
C(17) H(83) 2.905 ? . 1_565
C(17) H(89) 3.592 ? . .
C(17) H(105) 3.557 ? . .
C(18) H(7) 3.182 ? . .
C(18) H(8) 2.645 ? . .
C(18) H(9) 2.107 ? . .
C(18) H(10) 2.107 ? . .
C(18) H(13) 2.027 ? . .
C(18) H(14) 2.027 ? . .
C(18) H(15) 3.365 ? . .
C(18) H(16) 2.769 ? . .
C(18) H(18) 3.082 ? . 1_554
C(18) H(83) 3.186 ? . 1_565
C(18) H(89) 3.529 ? . .
C(19) H(7) 2.638 ? . .
C(19) H(8) 3.146 ? . .
C(19) H(9) 3.354 ? . .
C(19) H(10) 2.774 ? . .
C(19) H(11) 2.029 ? . .
C(19) H(12) 2.029 ? . .
C(19) H(15) 2.111 ? . .
C(19) H(16) 2.111 ? . .
C(19) H(18) 3.253 ? . 1_554
C(19) H(74) 3.337 ? . 1_565
C(19) H(98) 3.026 ? . .
C(20) H(3) 2.481 ? . .
C(20) H(7) 2.047 ? . .
C(20) H(8) 2.624 ? . .
C(20) H(10) 3.367 ? . .
C(20) H(11) 3.373 ? . .
C(20) H(12) 2.750 ? . .
C(20) H(13) 2.098 ? . .
C(20) H(14) 2.098 ? . .
C(20) H(98) 3.247 ? . .
C(20) H(102) 3.406 ? . .
C(21) H(1) 2.646 ? . .
C(21) H(17) 2.044 ? . .
C(21) H(18) 2.044 ? . .
C(21) H(19) 2.044 ? . .
C(21) H(20) 2.119 ? . .
C(21) H(21) 2.119 ? . .
C(21) H(22) 2.119 ? . .
C(21) H(23) 2.075 ? . .
C(21) H(24) 2.075 ? . .
C(21) H(25) 2.075 ? . .
C(22) H(1) 2.417 ? . .
C(22) H(11) 3.273 ? . 1_556
C(22) H(13) 3.326 ? . 1_556
C(22) H(20) 2.476 ? . .
C(22) H(21) 2.870 ? . .
C(22) H(22) 3.273 ? . .
C(22) H(23) 3.248 ? . .
C(22) H(24) 2.458 ? . .
C(22) H(25) 2.927 ? . .
C(22) H(93) 3.446 ? . 1_556
C(23) H(17) 3.275 ? . .
C(23) H(18) 2.425 ? . .
C(23) H(19) 2.892 ? . .
C(23) H(23) 2.521 ? . .
C(23) H(24) 2.961 ? . .
C(23) H(25) 3.336 ? . .
C(23) H(35) 3.207 ? . .
C(23) H(66) 3.380 ? . 1_565
C(23) H(69) 3.508 ? . 1_566
C(23) H(111) 3.281 ? . 1_465
C(23) H(112) 3.316 ? . 1_465
C(24) H(17) 2.466 ? . .
C(24) H(18) 2.885 ? . .
C(24) H(19) 3.272 ? . .
C(24) H(20) 3.332 ? . .
C(24) H(21) 2.545 ? . .
C(24) H(22) 2.955 ? . .
C(24) H(39) 3.030 ? . .
C(24) H(40) 3.407 ? . .
C(24) H(47) 3.522 ? . 1_655
C(24) H(88) 2.912 ? . 1_556
C(24) H(93) 3.376 ? . 1_556
C(24) H(107) 3.198 ? . .
C(24) H(108) 3.382 ? . .
C(25) H(1) 2.743 ? . .
C(25) H(2) 2.653 ? . .
C(25) H(26) 2.110 ? . .
C(25) H(27) 2.110 ? . .
C(25) H(28) 2.110 ? . .
C(25) H(29) 2.046 ? . .
C(25) H(30) 2.046 ? . .
C(25) H(31) 2.046 ? . .
C(25) H(32) 2.063 ? . .
C(25) H(33) 2.063 ? . .
C(25) H(34) 2.063 ? . .
C(25) H(49) 3.438 ? . 1_655
C(26) H(1) 2.573 ? . .
C(26) H(29) 3.263 ? . .
C(26) H(30) 2.410 ? . .
C(26) H(31) 2.852 ? . .
C(26) H(32) 2.460 ? . .
C(26) H(33) 2.898 ? . .
C(26) H(34) 3.295 ? . .
C(26) H(37) 2.909 ? . 1_655
C(26) H(49) 3.430 ? . 1_655
C(27) H(1) 3.418 ? . .
C(27) H(2) 3.294 ? . .
C(27) H(26) 2.428 ? . .
C(27) H(27) 2.877 ? . .
C(27) H(28) 3.243 ? . .
C(27) H(32) 3.260 ? . .
C(27) H(33) 2.483 ? . .
C(27) H(34) 2.947 ? . .
C(27) H(61) 3.191 ? . 1_565
C(27) H(84) 3.053 ? . 1_665
C(28) H(2) 2.632 ? . .
C(28) H(26) 3.274 ? . .
C(28) H(27) 2.467 ? . .
C(28) H(28) 2.928 ? . .
C(28) H(29) 2.520 ? . .
C(28) H(30) 2.871 ? . .
C(28) H(31) 3.296 ? . .
C(28) H(49) 3.403 ? . 1_655
C(28) H(82) 2.942 ? . 1_665
C(28) H(83) 3.598 ? . 1_665
C(28) H(84) 3.021 ? . 1_665
C(29) H(4) 2.654 ? . .
C(29) H(35) 2.077 ? . .
C(29) H(36) 2.077 ? . .
C(29) H(37) 2.077 ? . .
C(29) H(38) 2.093 ? . .
C(29) H(39) 2.093 ? . .
C(29) H(40) 2.093 ? . .
C(29) H(41) 2.076 ? . .
C(29) H(42) 2.077 ? . .
C(29) H(43) 2.076 ? . .
C(30) H(21) 3.426 ? . .
C(30) H(27) 3.392 ? . 1_455
C(30) H(38) 3.325 ? . .
C(30) H(39) 2.545 ? . .
C(30) H(40) 2.979 ? . .
C(30) H(41) 2.423 ? . .
C(30) H(42) 2.869 ? . .
C(30) H(43) 3.254 ? . .
C(30) H(111) 2.860 ? . 1_465
C(31) H(23) 2.833 ? . .
C(31) H(35) 2.552 ? . .
C(31) H(36) 2.955 ? . .
C(31) H(37) 3.338 ? . .
C(31) H(41) 3.294 ? . .
C(31) H(42) 2.477 ? . .
C(31) H(43) 2.925 ? . .
C(31) H(64) 3.524 ? . .
C(31) H(75) 3.443 ? . 1_556
C(31) H(76) 3.597 ? . 1_556
C(31) H(107) 3.470 ? . .
C(32) H(4) 2.402 ? . .
C(32) H(35) 3.249 ? . .
C(32) H(36) 2.416 ? . .
C(32) H(37) 2.881 ? . .
C(32) H(38) 2.501 ? . .
C(32) H(39) 2.898 ? . .
C(32) H(40) 3.304 ? . .
C(32) H(75) 3.336 ? . 1_556
C(32) H(96) 3.153 ? . 1_456
C(33) H(4) 2.718 ? . .
C(33) H(5) 2.723 ? . .
C(33) H(44) 2.027 ? . .
C(33) H(45) 2.027 ? . .
C(33) H(46) 2.027 ? . .
C(33) H(47) 2.081 ? . .
C(33) H(48) 2.081 ? . .
C(33) H(49) 2.081 ? . .
C(33) H(50) 2.038 ? . .
C(33) H(51) 2.038 ? . .
C(33) H(52) 2.038 ? . .
C(34) H(4) 2.611 ? . .
C(34) H(47) 2.468 ? . .
C(34) H(48) 2.897 ? . .
C(34) H(49) 3.248 ? . .
C(34) H(50) 3.205 ? . .
C(34) H(51) 2.410 ? . .
C(34) H(52) 2.868 ? . .
C(34) H(67) 3.258 ? . .
C(34) H(94) 3.271 ? . 1_456
C(34) H(108) 3.170 ? . 1_455
C(35) H(4) 3.332 ? . .
C(35) H(5) 3.386 ? . .
C(35) H(25) 3.353 ? . 1_455
C(35) H(28) 3.400 ? . 1_455
C(35) H(44) 3.270 ? . .
C(35) H(45) 2.461 ? . .
C(35) H(46) 2.865 ? . .
C(35) H(50) 2.451 ? . .
C(35) H(51) 2.916 ? . .
C(35) H(52) 3.263 ? . .
C(35) H(108) 3.216 ? . 1_455
C(36) H(5) 2.576 ? . .
C(36) H(44) 2.430 ? . .
C(36) H(45) 2.825 ? . .
C(36) H(46) 3.226 ? . .
C(36) H(47) 3.259 ? . .
C(36) H(48) 2.475 ? . .
C(36) H(49) 2.911 ? . .
C(36) H(60) 3.532 ? . .
C(36) H(67) 3.377 ? . .
C(36) H(99) 3.356 ? . 1_455
C(36) H(103) 3.328 ? . 1_455
C(37) H(16) 2.948 ? . 1_545
C(37) H(53) 3.248 ? . .
C(37) H(54) 3.306 ? . .
C(37) H(55) 3.315 ? . .
C(37) H(72) 3.118 ? . .
C(37) H(74) 3.008 ? . .
C(37) H(77) 2.621 ? . .
C(38) H(12) 3.430 ? . 1_545
C(38) H(16) 3.594 ? . 1_545
C(38) H(53) 1.994 ? . .
C(38) H(69) 2.968 ? . .
C(38) H(70) 3.342 ? . .
C(38) H(71) 2.547 ? . .
C(38) H(72) 2.941 ? . .
C(38) H(73) 3.312 ? . .
C(38) H(74) 2.513 ? . .
C(38) H(75) 2.922 ? . .
C(38) H(76) 3.302 ? . .
C(38) H(77) 2.493 ? . .
C(38) H(101) 3.496 ? . 1_455
C(39) H(12) 3.096 ? . 1_545
C(39) H(54) 3.238 ? . .
C(39) H(69) 3.148 ? . .
C(39) H(71) 2.378 ? . .
C(39) H(74) 3.443 ? . .
C(39) H(78) 3.383 ? . .
C(39) H(80) 2.413 ? . .
C(39) H(81) 3.434 ? . .
C(39) H(83) 3.413 ? . .
C(39) H(99) 3.595 ? . 1_455
C(39) H(101) 2.968 ? . 1_455
C(40) H(8) 3.588 ? . 1_545
C(40) H(12) 3.161 ? . 1_545
C(40) H(53) 2.020 ? . .
C(40) H(54) 2.033 ? . .
C(40) H(78) 2.963 ? . .
C(40) H(79) 3.325 ? . .
C(40) H(80) 2.537 ? . .
C(40) H(81) 2.924 ? . .
C(40) H(82) 3.303 ? . .
C(40) H(83) 2.486 ? . .
C(40) H(84) 2.942 ? . .
C(40) H(85) 3.321 ? . .
C(40) H(86) 2.518 ? . .
C(40) H(99) 3.338 ? . 1_455
C(40) H(101) 3.133 ? . 1_455
C(41) H(8) 3.020 ? . 1_545
C(41) H(12) 3.459 ? . 1_545
C(41) H(16) 3.422 ? . 1_545
C(41) H(53) 3.220 ? . .
C(41) H(55) 2.541 ? . .
C(41) H(83) 2.880 ? . .
C(41) H(84) 3.006 ? . .
C(41) H(86) 2.668 ? . .
C(41) H(99) 3.425 ? . 1_455
C(42) H(8) 3.439 ? . 1_545
C(42) H(16) 2.809 ? . 1_545
C(42) H(54) 2.079 ? . .
C(42) H(55) 2.078 ? . .
C(43) H(16) 3.111 ? . 1_545
C(43) H(52) 3.137 ? . .
C(43) H(54) 2.569 ? . .
C(43) H(59) 3.041 ? . .
C(43) H(60) 3.433 ? . .
C(43) H(67) 2.825 ? . .
C(43) H(68) 2.827 ? . .
C(44) H(10) 3.531 ? . .
C(44) H(56) 3.244 ? . .
C(44) H(57) 3.288 ? . .
C(44) H(58) 3.327 ? . .
C(44) H(78) 3.010 ? . 1_655
C(44) H(87) 3.108 ? . .
C(44) H(89) 3.020 ? . .
C(44) H(92) 2.602 ? . .
C(45) H(56) 1.996 ? . .
C(45) H(78) 2.916 ? . 1_655
C(45) H(87) 2.909 ? . .
C(45) H(88) 3.282 ? . .
C(45) H(89) 2.482 ? . .
C(45) H(90) 2.932 ? . .
C(45) H(91) 3.307 ? . .
C(45) H(92) 2.518 ? . .
C(45) H(93) 2.981 ? . .
C(45) H(94) 3.335 ? . .
C(45) H(95) 2.560 ? . .
C(46) H(14) 3.213 ? . .
C(46) H(57) 3.229 ? . .
C(46) H(78) 2.833 ? . 1_655
C(46) H(89) 3.334 ? . .
C(46) H(93) 3.154 ? . .
C(46) H(95) 2.425 ? . .
C(46) H(96) 3.082 ? . .
C(46) H(98) 2.732 ? . .
C(46) H(101) 2.905 ? . .
C(47) H(7) 3.209 ? . .
C(47) H(14) 3.421 ? . .
C(47) H(56) 2.046 ? . .
C(47) H(57) 2.016 ? . .
C(47) H(78) 2.950 ? . 1_655
C(47) H(96) 2.944 ? . .
C(47) H(97) 3.304 ? . .
C(47) H(98) 2.532 ? . .
C(47) H(99) 2.884 ? . .
C(47) H(100) 3.271 ? . .
C(47) H(101) 2.452 ? . .
C(47) H(102) 2.955 ? . .
C(47) H(103) 3.313 ? . .
C(47) H(104) 2.543 ? . .
C(48) H(7) 3.075 ? . .
C(48) H(56) 3.217 ? . .
C(48) H(58) 2.515 ? . .
C(48) H(78) 3.032 ? . 1_655
C(48) H(85) 3.243 ? . 1_655
C(48) H(86) 3.288 ? . 1_655
C(48) H(99) 3.414 ? . .
C(48) H(101) 3.379 ? . .
C(48) H(102) 3.374 ? . .
C(48) H(104) 2.456 ? . .
C(49) H(10) 3.596 ? . .
C(49) H(57) 2.028 ? . .
C(49) H(58) 2.021 ? . .
C(49) H(78) 3.103 ? . 1_655
C(49) H(85) 3.076 ? . 1_655
C(50) H(57) 2.527 ? . .
C(50) H(59) 3.575 ? . .
C(50) H(60) 2.953 ? . .
C(50) H(61) 2.881 ? . .
C(50) H(62) 2.813 ? . .
C(50) H(85) 3.205 ? . 1_655
C(51) H(55) 2.575 ? . .
C(51) H(60) 2.095 ? . .
C(51) H(61) 2.743 ? . .
C(51) H(62) 3.368 ? . .
C(51) H(63) 3.240 ? . .
C(51) H(65) 2.685 ? . .
C(51) H(66) 3.324 ? . .
C(51) H(67) 2.068 ? . .
C(51) H(68) 2.068 ? . .
C(52) H(52) 3.490 ? . .
C(52) H(58) 2.559 ? . .
C(52) H(59) 2.092 ? . .
C(52) H(61) 2.077 ? . .
C(52) H(62) 2.077 ? . .
C(52) H(63) 2.712 ? . .
C(52) H(64) 3.340 ? . .
C(52) H(65) 3.292 ? . .
C(52) H(67) 2.748 ? . .
C(52) H(68) 3.388 ? . .
C(53) H(31) 3.499 ? . 1_545
C(53) H(58) 2.487 ? . .
C(53) H(59) 2.708 ? . .
C(53) H(60) 2.072 ? . .
C(53) H(63) 2.053 ? . .
C(53) H(64) 2.053 ? . .
C(53) H(65) 2.749 ? . .
C(53) H(66) 3.363 ? . .
C(53) H(67) 3.282 ? . .
C(54) H(38) 3.412 ? . .
C(54) H(59) 3.201 ? . .
C(54) H(60) 2.702 ? . .
C(54) H(61) 2.059 ? . .
C(54) H(62) 2.059 ? . .
C(54) H(65) 2.076 ? . .
C(54) H(66) 2.075 ? . .
C(54) H(67) 2.701 ? . .
C(54) H(68) 3.338 ? . .
C(54) H(70) 3.205 ? . 1_556
C(55) H(59) 2.655 ? . .
C(55) H(60) 3.276 ? . .
C(55) H(61) 2.754 ? . .
C(55) H(62) 3.365 ? . .
C(55) H(63) 2.069 ? . .
C(55) H(64) 2.069 ? . .
C(55) H(67) 2.057 ? . .
C(55) H(68) 2.057 ? . .
C(55) H(70) 3.569 ? . 1_556
C(56) H(44) 3.347 ? . .
C(56) H(55) 2.470 ? . .
C(56) H(59) 2.059 ? . .
C(56) H(60) 2.737 ? . .
C(56) H(61) 3.311 ? . .
C(56) H(63) 2.700 ? . .
C(56) H(64) 3.330 ? . .
C(56) H(65) 2.056 ? . .
C(56) H(66) 2.056 ? . .
C(57) H(53) 2.676 ? . .
C(57) H(69) 2.098 ? . .
C(57) H(70) 2.098 ? . .
C(57) H(71) 2.098 ? . .
C(57) H(72) 2.049 ? . .
C(57) H(73) 2.049 ? . .
C(57) H(74) 2.049 ? . .
C(57) H(75) 2.051 ? . .
C(57) H(76) 2.051 ? . .
C(57) H(77) 2.051 ? . .
C(58) H(20) 3.454 ? . 1_544
C(58) H(53) 2.391 ? . .
C(58) H(64) 3.349 ? . 1_554
C(58) H(66) 3.415 ? . 1_554
C(58) H(72) 3.267 ? . .
C(58) H(73) 2.431 ? . .
C(58) H(74) 2.880 ? . .
C(58) H(75) 2.432 ? . .
C(58) H(76) 2.885 ? . .
C(58) H(77) 3.268 ? . .
C(59) H(13) 3.442 ? . 1_545
C(59) H(69) 2.457 ? . .
C(59) H(70) 2.878 ? . .
C(59) H(71) 3.261 ? . .
C(59) H(75) 3.268 ? . .
C(59) H(76) 2.496 ? . .
C(59) H(77) 2.945 ? . .
C(59) H(91) 3.454 ? . .
C(59) H(109) 3.391 ? . 1_554
C(59) H(110) 3.366 ? . 1_554
C(60) H(38) 3.232 ? . 1_554
C(60) H(42) 3.415 ? . 1_554
C(60) H(69) 3.264 ? . .
C(60) H(70) 2.461 ? . .
C(60) H(71) 2.878 ? . .
C(60) H(72) 2.522 ? . .
C(60) H(73) 2.898 ? . .
C(60) H(74) 3.289 ? . .
C(60) H(87) 2.872 ? . .
C(60) H(100) 3.594 ? . 1_455
C(60) H(105) 3.388 ? . .
C(60) H(106) 3.284 ? . .
C(61) H(53) 2.688 ? . .
C(61) H(54) 2.716 ? . .
C(61) H(78) 2.058 ? . .
C(61) H(79) 2.058 ? . .
C(61) H(80) 2.058 ? . .
C(61) H(81) 2.087 ? . .
C(61) H(82) 2.087 ? . .
C(61) H(83) 2.087 ? . .
C(61) H(84) 2.083 ? . .
C(61) H(85) 2.083 ? . .
C(61) H(86) 2.083 ? . .
C(61) H(101) 3.559 ? . 1_455
C(62) H(53) 2.563 ? . .
C(62) H(81) 2.571 ? . .
C(62) H(82) 2.936 ? . .
C(62) H(83) 3.329 ? . .
C(62) H(84) 3.246 ? . .
C(62) H(85) 2.428 ? . .
C(62) H(86) 2.873 ? . .
C(62) H(90) 3.598 ? . 1_455
C(62) H(101) 3.180 ? . 1_455
C(63) H(8) 3.488 ? . 1_545
C(63) H(9) 3.032 ? . 1_545
C(63) H(12) 3.198 ? . 1_545
C(63) H(33) 3.092 ? . 1_445
C(63) H(34) 3.434 ? . 1_445
C(63) H(53) 3.441 ? . .
C(63) H(54) 3.257 ? . .
C(63) H(78) 3.318 ? . .
C(63) H(79) 2.536 ? . .
C(63) H(80) 2.973 ? . .
C(63) H(84) 2.500 ? . .
C(63) H(85) 2.951 ? . .
C(63) H(86) 3.304 ? . .
C(64) H(29) 2.949 ? . 1_445
C(64) H(33) 3.145 ? . 1_445
C(64) H(54) 2.635 ? . .
C(64) H(78) 2.413 ? . .
C(64) H(79) 2.875 ? . .
C(64) H(80) 3.248 ? . .
C(64) H(81) 3.314 ? . .
C(64) H(82) 2.515 ? . .
C(64) H(83) 2.928 ? . .
C(65) H(56) 2.671 ? . .
C(65) H(87) 2.055 ? . .
C(65) H(88) 2.055 ? . .
C(65) H(89) 2.055 ? . .
C(65) H(90) 2.077 ? . .
C(65) H(91) 2.077 ? . .
C(65) H(92) 2.077 ? . .
C(65) H(93) 2.106 ? . .
C(65) H(94) 2.106 ? . .
C(65) H(95) 2.106 ? . .
C(66) H(24) 2.858 ? . 1_554
C(66) H(76) 3.138 ? . .
C(66) H(77) 3.554 ? . .
C(66) H(90) 3.297 ? . .
C(66) H(91) 2.527 ? . .
C(66) H(92) 2.957 ? . .
C(66) H(93) 2.426 ? . .
C(66) H(94) 2.887 ? . .
C(66) H(95) 3.246 ? . .
C(66) H(105) 3.375 ? . .
C(67) H(72) 3.223 ? . .
C(67) H(79) 3.547 ? . 1_655
C(67) H(87) 2.538 ? . .
C(67) H(88) 2.922 ? . .
C(67) H(89) 3.316 ? . .
C(67) H(93) 3.302 ? . .
C(67) H(94) 2.500 ? . .
C(67) H(95) 2.951 ? . .
C(67) H(109) 2.837 ? . 1_554
C(68) H(17) 3.506 ? . 1_554
C(68) H(24) 3.431 ? . 1_554
C(68) H(46) 3.502 ? . 1_654
C(68) H(56) 2.412 ? . .
C(68) H(87) 3.263 ? . .
C(68) H(88) 2.412 ? . .
C(68) H(89) 2.865 ? . .
C(68) H(90) 2.508 ? . .
C(68) H(91) 2.915 ? . .
C(68) H(92) 3.322 ? . .
C(69) H(7) 3.584 ? . .
C(69) H(56) 2.712 ? . .
C(69) H(57) 2.717 ? . .
C(69) H(96) 2.052 ? . .
C(69) H(97) 2.052 ? . .
C(69) H(98) 2.052 ? . .
C(69) H(99) 2.105 ? . .
C(69) H(100) 2.105 ? . .
C(69) H(101) 2.105 ? . .
C(69) H(102) 2.066 ? . .
C(69) H(103) 2.066 ? . .
C(69) H(104) 2.066 ? . .
C(70) H(14) 3.291 ? . .
C(70) H(15) 3.302 ? . .
C(70) H(41) 3.553 ? . 1_654
C(70) H(56) 2.668 ? . .
C(70) H(99) 3.300 ? . .
C(70) H(100) 2.523 ? . .
C(70) H(101) 2.954 ? . .
C(70) H(102) 2.439 ? . .
C(70) H(103) 2.826 ? . .
C(70) H(104) 3.248 ? . .
C(70) H(106) 3.347 ? . 1_655
C(71) H(50) 3.509 ? . 1_655
C(71) H(56) 3.289 ? . .
C(71) H(57) 3.458 ? . .
C(71) H(78) 3.471 ? . 1_655
C(71) H(86) 3.514 ? . 1_655
C(71) H(96) 2.498 ? . .
C(71) H(97) 2.954 ? . .
C(71) H(98) 3.307 ? . .
C(71) H(102) 3.318 ? . .
C(71) H(103) 2.505 ? . .
C(71) H(104) 2.906 ? . .
C(71) H(106) 3.247 ? . 1_655
C(72) H(7) 3.262 ? . .
C(72) H(48) 3.396 ? . 1_655
C(72) H(50) 3.041 ? . 1_655
C(72) H(57) 2.590 ? . .
C(72) H(96) 3.223 ? . .
C(72) H(97) 2.396 ? . .
C(72) H(98) 2.887 ? . .
C(72) H(99) 2.516 ? . .
C(72) H(100) 2.920 ? . .
C(72) H(101) 3.307 ? . .
C(73) H(9) 3.141 ? . .
C(73) H(75) 3.505 ? . .
C(73) H(77) 3.287 ? . .
C(73) H(97) 3.560 ? . 1_455
C(73) H(100) 3.021 ? . 1_455
C(74) H(25) 3.088 ? . .
C(74) H(40) 3.528 ? . .
C(74) H(45) 3.019 ? . 1_655
C(74) H(48) 3.381 ? . 1_655
C(74) H(61) 3.574 ? . .
C(74) H(62) 3.462 ? . .
C(75) H(72) 3.137 ? . 1_556
C(75) H(74) 3.443 ? . 1_556
C(75) H(90) 3.547 ? . 1_556
C(75) H(92) 3.215 ? . 1_556
C(76) H(21) 3.553 ? . 1_645
C(76) H(22) 3.051 ? . 1_645
C(76) H(35) 3.292 ? . 1_645
C(76) H(37) 3.404 ? . 1_645
H(1) C(1) 3.243 ? . .
H(1) C(2) 1.996 ? . .
H(1) C(4) 2.046 ? . .
H(1) C(5) 3.214 ? . .
H(1) C(21) 2.646 ? . .
H(1) C(22) 2.417 ? . .
H(1) C(25) 2.743 ? . .
H(1) C(26) 2.573 ? . .
H(1) C(27) 3.418 ? . .
H(1) H(17) 2.606 ? . .
H(1) H(18) 3.313 ? . .
H(1) H(19) 1.827 ? . .
H(1) H(25) 3.580 ? . .
H(1) H(26) 2.502 ? . .
H(1) H(27) 3.537 ? . .
H(1) H(28) 2.226 ? . .
H(1) H(31) 3.064 ? . .
H(1) H(47) 3.548 ? . 1_655
H(1) H(49) 3.555 ? . 1_655
H(1) H(65) 3.426 ? . 1_565
H(2) Cl(4) 3.254 ? . 1_565
H(2) C(1) 3.320 ? . .
H(2) C(3) 3.233 ? . .
H(2) C(4) 2.005 ? . .
H(2) C(6) 2.025 ? . .
H(2) C(7) 2.538 ? . .
H(2) C(25) 2.653 ? . .
H(2) C(27) 3.294 ? . .
H(2) C(28) 2.632 ? . .
H(2) H(3) 2.287 ? . .
H(2) H(29) 3.075 ? . .
H(2) H(31) 3.504 ? . .
H(2) H(32) 3.255 ? . .
H(2) H(33) 3.286 ? . .
H(2) H(34) 1.919 ? . .
H(2) H(59) 2.839 ? . 1_565
H(2) H(102) 3.532 ? . .
H(3) Cl(4) 3.167 ? . 1_565
H(3) N(1) 1.914 ? . .
H(3) C(1) 3.335 ? . .
H(3) C(5) 2.517 ? . .
H(3) C(6) 2.026 ? . .
H(3) C(15) 2.520 ? . .
H(3) C(20) 2.481 ? . .
H(3) H(2) 2.287 ? . .
H(3) H(7) 2.938 ? . .
H(3) H(15) 2.050 ? . .
H(3) H(16) 2.608 ? . .
H(3) H(59) 3.182 ? . 1_565
H(3) H(102) 2.661 ? . .
H(4) C(8) 3.266 ? . .
H(4) C(9) 2.010 ? . .
H(4) C(11) 2.023 ? . .
H(4) C(12) 3.229 ? . .
H(4) C(29) 2.654 ? . .
H(4) C(32) 2.402 ? . .
H(4) C(33) 2.718 ? . .
H(4) C(34) 2.611 ? . .
H(4) C(35) 3.332 ? . .
H(4) H(28) 3.406 ? . 1_455
H(4) H(41) 2.688 ? . .
H(4) H(42) 3.258 ? . .
H(4) H(43) 1.740 ? . .
H(4) H(44) 3.178 ? . .
H(4) H(45) 3.297 ? . .
H(4) H(46) 1.854 ? . .
H(4) H(47) 3.118 ? . .
H(4) H(49) 3.498 ? . .
H(4) H(63) 3.068 ? . .
H(5) Cl(3) 2.835 ? . .
H(5) Cl(11) 3.376 ? . .
H(5) C(8) 3.289 ? . .
H(5) C(10) 3.239 ? . .
H(5) C(11) 2.041 ? . .
H(5) C(13) 2.032 ? . .
H(5) C(14) 2.555 ? . .
H(5) C(33) 2.723 ? . .
H(5) C(35) 3.386 ? . .
H(5) C(36) 2.576 ? . .
H(5) H(6) 2.307 ? . .
H(5) H(32) 2.931 ? . 1_455
H(5) H(49) 3.029 ? . .
H(5) H(50) 2.476 ? . .
H(5) H(51) 3.542 ? . .
H(5) H(52) 2.249 ? . .
H(5) H(60) 2.898 ? . .
H(6) Cl(3) 3.287 ? . .
H(6) Cl(11) 3.056 ? . .
H(6) N(2) 1.905 ? . .
H(6) C(8) 3.312 ? . .
H(6) C(12) 2.539 ? . .
H(6) C(13) 2.065 ? . .
H(6) C(16) 2.546 ? . .
H(6) C(17) 2.448 ? . .
H(6) H(5) 2.307 ? . .
H(6) H(8) 3.065 ? . .
H(6) H(9) 2.114 ? . .
H(6) H(10) 2.438 ? . .
H(6) H(32) 3.126 ? . 1_455
H(6) H(105) 3.579 ? . .
H(7) Mn(1) 3.230 ? . .
H(7) Cl(2) 3.063 ? . .
H(7) N(1) 2.021 ? . .
H(7) N(2) 2.679 ? . .
H(7) C(7) 2.825 ? . .
H(7) C(16) 2.049 ? . .
H(7) C(17) 2.680 ? . .
H(7) C(18) 3.182 ? . .
H(7) C(19) 2.638 ? . .
H(7) C(20) 2.047 ? . .
H(7) C(47) 3.209 ? . .
H(7) C(48) 3.075 ? . .
H(7) C(69) 3.584 ? . .
H(7) C(72) 3.262 ? . .
H(7) H(3) 2.938 ? . .
H(7) H(8) 2.841 ? . .
H(7) H(9) 3.594 ? . .
H(7) H(10) 2.547 ? . .
H(7) H(13) 3.545 ? . .
H(7) H(14) 2.473 ? . .
H(7) H(15) 2.349 ? . .
H(7) H(16) 2.859 ? . .
H(7) H(57) 3.115 ? . .
H(7) H(98) 3.300 ? . .
H(7) H(102) 2.727 ? . .
H(7) H(104) 3.157 ? . .
H(8) Mn(1) 3.150 ? . .
H(8) Cl(1) 2.935 ? . .
H(8) N(1) 2.649 ? . .
H(8) N(2) 2.037 ? . .
H(8) C(14) 2.934 ? . .
H(8) C(15) 2.042 ? . .
H(8) C(17) 2.053 ? . .
H(8) C(18) 2.645 ? . .
H(8) C(19) 3.146 ? . .
H(8) C(20) 2.624 ? . .
H(8) C(40) 3.588 ? . 1_565
H(8) C(41) 3.020 ? . 1_565
H(8) C(42) 3.439 ? . 1_565
H(8) C(63) 3.488 ? . 1_565
H(8) H(6) 3.065 ? . .
H(8) H(7) 2.841 ? . .
H(8) H(9) 2.349 ? . .
H(8) H(10) 2.866 ? . .
H(8) H(11) 3.560 ? . .
H(8) H(12) 2.500 ? . .
H(8) H(15) 3.541 ? . .
H(8) H(16) 2.468 ? . .
H(8) H(54) 2.886 ? . 1_565
H(8) H(55) 3.529 ? . 1_565
H(8) H(83) 2.516 ? . 1_565
H(9) Cl(11) 2.802 ? . .
H(9) Cl(12) 3.222 ? . .
H(9) N(2) 2.788 ? . .
H(9) C(14) 2.748 ? . .
H(9) C(15) 3.373 ? . .
H(9) C(16) 2.083 ? . .
H(9) C(18) 2.107 ? . .
H(9) C(19) 3.354 ? . .
H(9) C(63) 3.032 ? . 1_565
H(9) C(73) 3.141 ? . .
H(9) H(6) 2.114 ? . .
H(9) H(7) 3.594 ? . .
H(9) H(8) 2.349 ? . .
H(9) H(10) 1.606 ? . .
H(9) H(11) 2.428 ? . .
H(9) H(12) 2.368 ? . .
H(9) H(81) 3.013 ? . 1_565
H(9) H(82) 3.377 ? . 1_565
H(9) H(83) 2.315 ? . 1_565
H(9) H(105) 3.055 ? . .
H(10) N(2) 2.783 ? . .
H(10) C(14) 2.931 ? . .
H(10) C(15) 2.767 ? . .
H(10) C(16) 2.084 ? . .
H(10) C(18) 2.107 ? . .
H(10) C(19) 2.774 ? . .
H(10) C(20) 3.367 ? . .
H(10) C(44) 3.531 ? . .
H(10) C(49) 3.596 ? . .
H(10) H(6) 2.438 ? . .
H(10) H(7) 2.547 ? . .
H(10) H(8) 2.866 ? . .
H(10) H(9) 1.606 ? . .
H(10) H(11) 2.377 ? . .
H(10) H(12) 2.893 ? . .
H(10) H(14) 2.631 ? . .
H(10) H(89) 2.941 ? . .
H(10) H(105) 3.199 ? . .
H(11) Cl(12) 2.937 ? . .
H(11) C(16) 3.343 ? . .
H(11) C(17) 2.095 ? . .
H(11) C(19) 2.029 ? . .
H(11) C(20) 3.373 ? . .
H(11) C(22) 3.273 ? . 1_554
H(11) H(8) 3.560 ? . .
H(11) H(9) 2.428 ? . .
H(11) H(10) 2.377 ? . .
H(11) H(12) 1.601 ? . .
H(11) H(13) 2.328 ? . .
H(11) H(14) 2.298 ? . .
H(11) H(17) 3.403 ? . 1_554
H(11) H(18) 2.380 ? . 1_554
H(11) H(89) 2.869 ? . .
H(12) C(15) 3.284 ? . .
H(12) C(16) 2.722 ? . .
H(12) C(17) 2.095 ? . .
H(12) C(19) 2.029 ? . .
H(12) C(20) 2.750 ? . .
H(12) C(38) 3.430 ? . 1_565
H(12) C(39) 3.096 ? . 1_565
H(12) C(40) 3.161 ? . 1_565
H(12) C(41) 3.459 ? . 1_565
H(12) C(63) 3.198 ? . 1_565
H(12) H(8) 2.500 ? . .
H(12) H(9) 2.368 ? . .
H(12) H(10) 2.893 ? . .
H(12) H(11) 1.601 ? . .
H(12) H(13) 2.300 ? . .
H(12) H(14) 2.828 ? . .
H(12) H(16) 2.629 ? . .
H(12) H(18) 3.271 ? . 1_554
H(12) H(53) 3.373 ? . 1_565
H(12) H(74) 3.453 ? . 1_565
H(12) H(81) 3.035 ? . 1_565
H(12) H(83) 2.598 ? . 1_565
H(13) Cl(9) 3.061 ? . 1_564
H(13) C(15) 3.336 ? . .
H(13) C(17) 3.362 ? . .
H(13) C(18) 2.027 ? . .
H(13) C(20) 2.098 ? . .
H(13) C(22) 3.326 ? . 1_554
H(13) C(59) 3.442 ? . 1_565
H(13) H(7) 3.545 ? . .
H(13) H(11) 2.328 ? . .
H(13) H(12) 2.300 ? . .
H(13) H(14) 1.600 ? . .
H(13) H(15) 2.415 ? . .
H(13) H(16) 2.393 ? . .
H(13) H(17) 3.365 ? . 1_554
H(13) H(18) 2.737 ? . 1_554
H(13) H(19) 3.365 ? . 1_554
H(13) H(74) 2.466 ? . 1_565
H(13) H(98) 3.183 ? . .
H(13) H(110) 3.424 ? . 1_564
H(14) C(15) 2.700 ? . .
H(14) C(16) 3.236 ? . .
H(14) C(17) 2.736 ? . .
H(14) C(18) 2.027 ? . .
H(14) C(20) 2.098 ? . .
H(14) C(46) 3.213 ? . .
H(14) C(47) 3.421 ? . .
H(14) C(70) 3.291 ? . .
H(14) H(7) 2.473 ? . .
H(14) H(10) 2.631 ? . .
H(14) H(11) 2.298 ? . .
H(14) H(12) 2.828 ? . .
H(14) H(13) 1.600 ? . .
H(14) H(15) 2.383 ? . .
H(14) H(16) 2.897 ? . .
H(14) H(18) 3.418 ? . 1_554
H(14) H(56) 3.241 ? . .
H(14) H(89) 3.359 ? . .
H(14) H(98) 2.337 ? . .
H(15) Cl(4) 3.593 ? . 1_565
H(15) N(1) 2.765 ? . .
H(15) C(7) 2.705 ? . .
H(15) C(15) 2.070 ? . .
H(15) C(16) 3.340 ? . .
H(15) C(18) 3.365 ? . .
H(15) C(19) 2.111 ? . .
H(15) C(70) 3.302 ? . .
H(15) H(3) 2.050 ? . .
H(15) H(7) 2.349 ? . .
H(15) H(8) 3.541 ? . .
H(15) H(13) 2.415 ? . .
H(15) H(14) 2.383 ? . .
H(15) H(16) 1.606 ? . .
H(15) H(97) 3.108 ? . .
H(15) H(98) 2.707 ? . .
H(15) H(102) 2.750 ? . .
H(15) H(110) 3.176 ? . 1_564
H(16) O(3) 3.229 ? . 1_565
H(16) N(1) 2.756 ? . .
H(16) N(3) 3.571 ? . 1_565
H(16) C(7) 3.033 ? . .
H(16) C(15) 2.070 ? . .
H(16) C(16) 2.709 ? . .
H(16) C(17) 3.341 ? . .
H(16) C(18) 2.769 ? . .
H(16) C(19) 2.111 ? . .
H(16) C(37) 2.948 ? . 1_565
H(16) C(38) 3.594 ? . 1_565
H(16) C(41) 3.422 ? . 1_565
H(16) C(42) 2.809 ? . 1_565
H(16) C(43) 3.111 ? . 1_565
H(16) H(3) 2.608 ? . .
H(16) H(7) 2.859 ? . .
H(16) H(8) 2.468 ? . .
H(16) H(12) 2.629 ? . .
H(16) H(13) 2.393 ? . .
H(16) H(14) 2.897 ? . .
H(16) H(15) 1.606 ? . .
H(16) H(55) 3.496 ? . 1_565
H(16) H(74) 3.432 ? . 1_565
H(17) C(2) 2.949 ? . .
H(17) C(3) 3.113 ? . .
H(17) C(21) 2.044 ? . .
H(17) C(23) 3.275 ? . .
H(17) C(24) 2.466 ? . .
H(17) C(68) 3.506 ? . 1_556
H(17) H(1) 2.606 ? . .
H(17) H(11) 3.403 ? . 1_556
H(17) H(13) 3.365 ? . 1_556
H(17) H(18) 1.600 ? . .
H(17) H(19) 1.600 ? . .
H(17) H(20) 3.415 ? . .
H(17) H(21) 3.543 ? . .
H(17) H(23) 3.388 ? . .
H(17) H(24) 2.246 ? . .
H(17) H(25) 2.706 ? . .
H(17) H(88) 3.458 ? . 1_556
H(17) H(93) 2.529 ? . 1_556
H(18) C(2) 3.314 ? . .
H(18) C(18) 3.082 ? . 1_556
H(18) C(19) 3.253 ? . 1_556
H(18) C(21) 2.044 ? . .
H(18) C(23) 2.425 ? . .
H(18) C(24) 2.885 ? . .
H(18) H(1) 3.313 ? . .
H(18) H(11) 2.380 ? . 1_556
H(18) H(12) 3.271 ? . 1_556
H(18) H(13) 2.737 ? . 1_556
H(18) H(14) 3.418 ? . 1_556
H(18) H(17) 1.600 ? . .
H(18) H(19) 1.600 ? . .
H(18) H(20) 2.254 ? . .
H(18) H(21) 2.590 ? . .
H(18) H(22) 3.367 ? . .
H(18) H(23) 3.516 ? . .
H(18) H(24) 2.656 ? . .
H(18) H(25) 3.549 ? . .
H(18) H(69) 3.478 ? . 1_566
H(18) H(74) 3.380 ? . 1_566
H(19) Cl(9) 3.313 ? . 1_565
H(19) C(2) 2.543 ? . .
H(19) C(3) 2.440 ? . .
H(19) C(21) 2.044 ? . .
H(19) C(23) 2.892 ? . .
H(19) C(24) 3.272 ? . .
H(19) H(1) 1.827 ? . .
H(19) H(13) 3.365 ? . 1_556
H(19) H(17) 1.600 ? . .
H(19) H(18) 1.600 ? . .
H(19) H(20) 2.659 ? . .
H(19) H(21) 3.502 ? . .
H(19) H(22) 3.575 ? . .
H(19) H(24) 3.393 ? . .
H(19) H(25) 3.594 ? . .
H(19) H(69) 3.409 ? . 1_566
H(19) H(73) 3.186 ? . 1_566
H(19) H(74) 3.241 ? . 1_566
H(20) Cl(8) 3.286 ? . 1_465
H(20) C(2) 2.980 ? . .
H(20) C(21) 2.119 ? . .
H(20) C(22) 2.476 ? . .
H(20) C(24) 3.332 ? . .
H(20) C(58) 3.454 ? . 1_566
H(20) H(17) 3.415 ? . .
H(20) H(18) 2.254 ? . .
H(20) H(19) 2.659 ? . .
H(20) H(21) 1.600 ? . .
H(20) H(22) 1.600 ? . .
H(20) H(23) 3.453 ? . .
H(20) H(65) 3.596 ? . 1_565
H(20) H(66) 2.938 ? . 1_565
H(20) H(69) 2.537 ? . 1_566
H(20) H(111) 3.435 ? . 1_465
H(20) H(112) 3.480 ? . 1_465
H(21) Cl(12) 3.059 ? . 1_556
H(21) O(1) 3.395 ? . .
H(21) C(2) 3.340 ? . .
H(21) C(21) 2.119 ? . .
H(21) C(22) 2.870 ? . .
H(21) C(24) 2.545 ? . .
H(21) C(30) 3.426 ? . .
H(21) C(76) 3.553 ? . 1_465
H(21) H(17) 3.543 ? . .
H(21) H(18) 2.590 ? . .
H(21) H(19) 3.502 ? . .
H(21) H(20) 1.600 ? . .
H(21) H(22) 1.600 ? . .
H(21) H(23) 2.341 ? . .
H(21) H(24) 2.741 ? . .
H(21) H(25) 3.477 ? . .
H(21) H(35) 2.623 ? . .
H(21) H(36) 3.390 ? . .
H(21) H(39) 3.247 ? . .
H(21) H(111) 2.986 ? . 1_465
H(21) H(112) 3.462 ? . 1_465
H(22) Cl(8) 3.463 ? . 1_465
H(22) O(1) 2.296 ? . .
H(22) C(1) 2.663 ? . .
H(22) C(2) 2.559 ? . .
H(22) C(21) 2.119 ? . .
H(22) C(22) 3.273 ? . .
H(22) C(24) 2.955 ? . .
H(22) C(76) 3.051 ? . 1_465
H(22) H(18) 3.367 ? . .
H(22) H(19) 3.575 ? . .
H(22) H(20) 1.600 ? . .
H(22) H(21) 1.600 ? . .
H(22) H(23) 2.713 ? . .
H(22) H(24) 3.582 ? . .
H(22) H(35) 2.926 ? . .
H(22) H(65) 3.524 ? . 1_565
H(22) H(66) 2.980 ? . 1_565
H(22) H(68) 3.345 ? . 1_565
H(22) H(111) 2.902 ? . 1_465
H(22) H(112) 2.561 ? . 1_465
H(23) O(1) 2.590 ? . .
H(23) O(2) 3.396 ? . .
H(23) C(1) 3.098 ? . .
H(23) C(2) 2.908 ? . .
H(23) C(21) 2.075 ? . .
H(23) C(22) 3.248 ? . .
H(23) C(23) 2.521 ? . .
H(23) C(31) 2.833 ? . .
H(23) H(17) 3.388 ? . .
H(23) H(18) 3.516 ? . .
H(23) H(20) 3.453 ? . .
H(23) H(21) 2.341 ? . .
H(23) H(22) 2.713 ? . .
H(23) H(24) 1.600 ? . .
H(23) H(25) 1.600 ? . .
H(23) H(35) 2.919 ? . .
H(23) H(38) 3.547 ? . .
H(23) H(39) 2.278 ? . .
H(23) H(40) 2.543 ? . .
H(23) H(88) 3.268 ? . 1_556
H(23) H(107) 2.982 ? . .
H(24) C(2) 3.280 ? . .
H(24) C(21) 2.075 ? . .
H(24) C(22) 2.458 ? . .
H(24) C(23) 2.961 ? . .
H(24) C(66) 2.858 ? . 1_556
H(24) C(68) 3.431 ? . 1_556
H(24) H(17) 2.246 ? . .
H(24) H(18) 2.656 ? . .
H(24) H(19) 3.393 ? . .
H(24) H(21) 2.741 ? . .
H(24) H(22) 3.582 ? . .
H(24) H(23) 1.600 ? . .
H(24) H(25) 1.600 ? . .
H(24) H(39) 2.954 ? . .
H(24) H(87) 3.482 ? . 1_556
H(24) H(88) 2.017 ? . 1_556
H(24) H(89) 2.924 ? . 1_556
H(24) H(93) 2.694 ? . 1_556
H(24) H(94) 3.542 ? . 1_556
H(24) H(107) 3.523 ? . .
H(24) H(108) 3.456 ? . .
H(25) O(1) 3.074 ? . .
H(25) C(1) 2.959 ? . .
H(25) C(2) 2.468 ? . .
H(25) C(3) 3.331 ? . .
H(25) C(21) 2.075 ? . .
H(25) C(22) 2.927 ? . .
H(25) C(23) 3.336 ? . .
H(25) C(35) 3.353 ? . 1_655
H(25) C(74) 3.088 ? . .
H(25) H(1) 3.580 ? . .
H(25) H(17) 2.706 ? . .
H(25) H(18) 3.549 ? . .
H(25) H(19) 3.594 ? . .
H(25) H(21) 3.477 ? . .
H(25) H(23) 1.600 ? . .
H(25) H(24) 1.600 ? . .
H(25) H(47) 2.626 ? . 1_655
H(25) H(48) 3.272 ? . 1_655
H(25) H(88) 3.163 ? . 1_556
H(25) H(93) 3.268 ? . 1_556
H(25) H(107) 2.641 ? . .
H(25) H(108) 2.630 ? . .
H(26) Cl(7) 3.148 ? . 1_565
H(26) Cl(9) 3.504 ? . 1_565
H(26) C(3) 3.077 ? . .
H(26) C(4) 2.958 ? . .
H(26) C(25) 2.110 ? . .
H(26) C(27) 2.428 ? . .
H(26) C(28) 3.274 ? . .
H(26) H(1) 2.502 ? . .
H(26) H(27) 1.600 ? . .
H(26) H(28) 1.600 ? . .
H(26) H(29) 3.372 ? . .
H(26) H(30) 2.205 ? . .
H(26) H(31) 2.598 ? . .
H(26) H(32) 3.389 ? . .
H(26) H(33) 3.546 ? . .
H(26) H(37) 2.763 ? . 1_655
H(27) Cl(1) 3.530 ? . 1_655
H(27) O(2) 3.348 ? . 1_655
H(27) C(4) 3.324 ? . .
H(27) C(8) 2.967 ? . 1_655
H(27) C(9) 3.145 ? . 1_655
H(27) C(10) 3.550 ? . 1_655
H(27) C(13) 3.249 ? . 1_655
H(27) C(25) 2.110 ? . .
H(27) C(27) 2.877 ? . .
H(27) C(28) 2.467 ? . .
H(27) C(30) 3.392 ? . 1_655
H(27) H(1) 3.537 ? . .
H(27) H(26) 1.600 ? . .
H(27) H(28) 1.600 ? . .
H(27) H(29) 3.563 ? . .
H(27) H(30) 2.607 ? . .
H(27) H(31) 3.492 ? . .
H(27) H(32) 2.244 ? . .
H(27) H(33) 2.656 ? . .
H(27) H(34) 3.405 ? . .
H(27) H(37) 2.498 ? . 1_655
H(28) C(3) 2.611 ? . .
H(28) C(4) 2.541 ? . .
H(28) C(9) 3.326 ? . 1_655
H(28) C(10) 3.150 ? . 1_655
H(28) C(11) 3.406 ? . 1_655
H(28) C(25) 2.110 ? . .
H(28) C(27) 3.243 ? . .
H(28) C(28) 2.928 ? . .
H(28) C(35) 3.400 ? . 1_655
H(28) H(1) 2.226 ? . .
H(28) H(4) 3.406 ? . 1_655
H(28) H(26) 1.600 ? . .
H(28) H(27) 1.600 ? . .
H(28) H(30) 3.346 ? . .
H(28) H(31) 3.513 ? . .
H(28) H(32) 2.681 ? . .
H(28) H(33) 3.547 ? . .
H(28) H(37) 2.990 ? . 1_655
H(28) H(47) 3.251 ? . 1_655
H(28) H(49) 2.740 ? . 1_655
H(29) Cl(5) 3.170 ? . 1_565
H(29) C(4) 2.907 ? . .
H(29) C(5) 3.330 ? . .
H(29) C(25) 2.046 ? . .
H(29) C(26) 3.263 ? . .
H(29) C(28) 2.520 ? . .
H(29) C(64) 2.949 ? . 1_665
H(29) H(2) 3.075 ? . .
H(29) H(26) 3.372 ? . .
H(29) H(27) 3.563 ? . .
H(29) H(30) 1.600 ? . .
H(29) H(31) 1.600 ? . .
H(29) H(32) 3.441 ? . .
H(29) H(33) 2.327 ? . .
H(29) H(34) 2.750 ? . .
H(29) H(61) 2.904 ? . 1_565
H(29) H(84) 2.288 ? . 1_665
H(29) H(85) 2.844 ? . 1_665
H(29) H(86) 3.338 ? . 1_665
H(30) Cl(5) 3.191 ? . 1_565
H(30) Cl(7) 2.954 ? . 1_565
H(30) C(4) 3.277 ? . .
H(30) C(25) 2.046 ? . .
H(30) C(26) 2.410 ? . .
H(30) C(28) 2.871 ? . .
H(30) H(26) 2.205 ? . .
H(30) H(27) 2.607 ? . .
H(30) H(28) 3.346 ? . .
H(30) H(29) 1.600 ? . .
H(30) H(31) 1.600 ? . .
H(30) H(32) 3.502 ? . .
H(30) H(33) 2.636 ? . .
H(30) H(34) 3.537 ? . .
H(30) H(84) 3.120 ? . 1_665
H(31) Cl(5) 3.459 ? . 1_565
H(31) Cl(6) 3.322 ? . 1_565
H(31) C(3) 3.063 ? . .
H(31) C(4) 2.481 ? . .
H(31) C(5) 3.310 ? . .
H(31) C(25) 2.046 ? . .
H(31) C(26) 2.852 ? . .
H(31) C(28) 3.296 ? . .
H(31) C(53) 3.499 ? . 1_565
H(31) H(1) 3.064 ? . .
H(31) H(2) 3.504 ? . .
H(31) H(26) 2.598 ? . .
H(31) H(27) 3.492 ? . .
H(31) H(28) 3.513 ? . .
H(31) H(29) 1.600 ? . .
H(31) H(30) 1.600 ? . .
H(31) H(33) 3.426 ? . .
H(31) H(61) 2.601 ? . 1_565
H(31) H(64) 3.546 ? . 1_565
H(31) H(65) 2.902 ? . 1_565
H(32) C(4) 2.957 ? . .
H(32) C(5) 3.439 ? . .
H(32) C(8) 3.559 ? . 1_655
H(32) C(11) 3.470 ? . 1_655
H(32) C(12) 2.821 ? . 1_655
H(32) C(13) 2.859 ? . 1_655
H(32) C(14) 3.073 ? . 1_655
H(32) C(25) 2.063 ? . .
H(32) C(26) 2.460 ? . .
H(32) C(27) 3.260 ? . .
H(32) H(2) 3.255 ? . .
H(32) H(5) 2.931 ? . 1_655
H(32) H(6) 3.126 ? . 1_655
H(32) H(26) 3.389 ? . .
H(32) H(27) 2.244 ? . .
H(32) H(28) 2.681 ? . .
H(32) H(29) 3.441 ? . .
H(32) H(30) 3.502 ? . .
H(32) H(33) 1.600 ? . .
H(32) H(34) 1.600 ? . .
H(32) H(49) 2.876 ? . 1_655
H(32) H(82) 3.430 ? . 1_665
H(33) C(4) 3.315 ? . .
H(33) C(25) 2.063 ? . .
H(33) C(26) 2.898 ? . .
H(33) C(27) 2.483 ? . .
H(33) C(63) 3.092 ? . 1_665
H(33) C(64) 3.145 ? . 1_665
H(33) H(2) 3.286 ? . .
H(33) H(26) 3.546 ? . .
H(33) H(27) 2.656 ? . .
H(33) H(28) 3.547 ? . .
H(33) H(29) 2.327 ? . .
H(33) H(30) 2.636 ? . .
H(33) H(31) 3.426 ? . .
H(33) H(32) 1.600 ? . .
H(33) H(34) 1.600 ? . .
H(33) H(82) 2.514 ? . 1_665
H(33) H(83) 2.909 ? . 1_665
H(33) H(84) 2.218 ? . 1_665
H(33) H(85) 3.500 ? . 1_665
H(34) Cl(11) 3.490 ? . 1_655
H(34) C(4) 2.545 ? . .
H(34) C(5) 2.452 ? . .
H(34) C(25) 2.063 ? . .
H(34) C(26) 3.295 ? . .
H(34) C(27) 2.947 ? . .
H(34) C(63) 3.434 ? . 1_665
H(34) H(2) 1.919 ? . .
H(34) H(27) 3.405 ? . .
H(34) H(29) 2.750 ? . .
H(34) H(30) 3.537 ? . .
H(34) H(32) 1.600 ? . .
H(34) H(33) 1.600 ? . .
H(34) H(49) 3.452 ? . 1_655
H(34) H(82) 2.537 ? . 1_665
H(34) H(83) 3.568 ? . 1_665
H(34) H(84) 3.135 ? . 1_665
H(35) O(1) 3.473 ? . .
H(35) O(2) 2.523 ? . .
H(35) C(8) 3.122 ? . .
H(35) C(9) 2.942 ? . .
H(35) C(23) 3.207 ? . .
H(35) C(29) 2.077 ? . .
H(35) C(31) 2.552 ? . .
H(35) C(32) 3.249 ? . .
H(35) C(76) 3.292 ? . 1_465
H(35) H(21) 2.623 ? . .
H(35) H(22) 2.926 ? . .
H(35) H(23) 2.919 ? . .
H(35) H(36) 1.600 ? . .
H(35) H(37) 1.600 ? . .
H(35) H(38) 3.477 ? . .
H(35) H(39) 2.363 ? . .
H(35) H(40) 2.766 ? . .
H(35) H(41) 3.358 ? . .
H(35) H(42) 3.529 ? . .
H(35) H(111) 2.544 ? . 1_465
H(35) H(112) 3.171 ? . 1_465
H(36) Cl(9) 3.450 ? . 1_465
H(36) Cl(10) 2.991 ? . 1_465
H(36) Cl(12) 3.248 ? . 1_556
H(36) C(9) 3.314 ? . .
H(36) C(29) 2.077 ? . .
H(36) C(31) 2.955 ? . .
H(36) C(32) 2.416 ? . .
H(36) H(21) 3.390 ? . .
H(36) H(35) 1.600 ? . .
H(36) H(37) 1.600 ? . .
H(36) H(39) 2.736 ? . .
H(36) H(40) 3.595 ? . .
H(36) H(41) 2.193 ? . .
H(36) H(42) 2.609 ? . .
H(36) H(43) 3.354 ? . .
H(36) H(111) 2.816 ? . 1_465
H(37) Cl(9) 3.570 ? . 1_465
H(37) O(2) 2.962 ? . .
H(37) C(8) 2.993 ? . .
H(37) C(9) 2.522 ? . .
H(37) C(10) 3.456 ? . .
H(37) C(26) 2.909 ? . 1_455
H(37) C(29) 2.077 ? . .
H(37) C(31) 3.338 ? . .
H(37) C(32) 2.881 ? . .
H(37) C(76) 3.404 ? . 1_465
H(37) H(26) 2.763 ? . 1_455
H(37) H(27) 2.498 ? . 1_455
H(37) H(28) 2.990 ? . 1_455
H(37) H(35) 1.600 ? . .
H(37) H(36) 1.600 ? . .
H(37) H(39) 3.477 ? . .
H(37) H(41) 2.628 ? . .
H(37) H(42) 3.510 ? . .
H(37) H(43) 3.551 ? . .
H(37) H(111) 2.738 ? . 1_465
H(37) H(112) 3.468 ? . 1_465
H(38) Cl(6) 3.430 ? . .
H(38) C(9) 2.938 ? . .
H(38) C(29) 2.093 ? . .
H(38) C(30) 3.325 ? . .
H(38) C(32) 2.501 ? . .
H(38) C(54) 3.412 ? . .
H(38) C(60) 3.232 ? . 1_556
H(38) H(23) 3.547 ? . .
H(38) H(35) 3.477 ? . .
H(38) H(39) 1.600 ? . .
H(38) H(40) 1.600 ? . .
H(38) H(41) 3.436 ? . .
H(38) H(42) 2.301 ? . .
H(38) H(43) 2.693 ? . .
H(38) H(62) 3.583 ? . .
H(38) H(63) 3.166 ? . .
H(38) H(64) 2.807 ? . .
H(38) H(70) 2.873 ? . 1_556
H(38) H(75) 2.715 ? . 1_556
H(38) H(76) 2.872 ? . 1_556
H(38) H(107) 3.599 ? . .
H(39) Cl(12) 3.224 ? . 1_556
H(39) O(2) 3.457 ? . .
H(39) C(9) 3.313 ? . .
H(39) C(24) 3.030 ? . .
H(39) C(29) 2.093 ? . .
H(39) C(30) 2.545 ? . .
H(39) C(32) 2.898 ? . .
H(39) H(21) 3.247 ? . .
H(39) H(23) 2.278 ? . .
H(39) H(24) 2.954 ? . .
H(39) H(35) 2.363 ? . .
H(39) H(36) 2.736 ? . .
H(39) H(37) 3.477 ? . .
H(39) H(38) 1.600 ? . .
H(39) H(40) 1.600 ? . .
H(39) H(41) 3.563 ? . .
H(39) H(42) 2.642 ? . .
H(39) H(43) 3.531 ? . .
H(39) H(75) 3.408 ? . 1_556
H(39) H(76) 3.442 ? . 1_556
H(39) H(88) 3.401 ? . 1_556
H(40) Cl(2) 3.421 ? . .
H(40) O(2) 2.457 ? . .
H(40) C(8) 2.664 ? . .
H(40) C(9) 2.514 ? . .
H(40) C(24) 3.407 ? . .
H(40) C(29) 2.093 ? . .
H(40) C(30) 2.979 ? . .
H(40) C(32) 3.304 ? . .
H(40) C(74) 3.528 ? . .
H(40) H(23) 2.543 ? . .
H(40) H(35) 2.766 ? . .
H(40) H(36) 3.595 ? . .
H(40) H(38) 1.600 ? . .
H(40) H(39) 1.600 ? . .
H(40) H(42) 3.418 ? . .
H(40) H(62) 3.007 ? . .
H(40) H(63) 3.533 ? . .
H(40) H(64) 3.400 ? . .
H(40) H(107) 2.725 ? . .
H(41) Cl(9) 3.283 ? . 1_465
H(41) C(9) 2.978 ? . .
H(41) C(10) 3.171 ? . .
H(41) C(29) 2.076 ? . .
H(41) C(30) 2.423 ? . .
H(41) C(31) 3.294 ? . .
H(41) C(70) 3.553 ? . 1_456
H(41) H(4) 2.688 ? . .
H(41) H(35) 3.358 ? . .
H(41) H(36) 2.193 ? . .
H(41) H(37) 2.628 ? . .
H(41) H(38) 3.436 ? . .
H(41) H(39) 3.563 ? . .
H(41) H(42) 1.600 ? . .
H(41) H(43) 1.600 ? . .
H(41) H(96) 2.709 ? . 1_456
H(42) C(9) 3.335 ? . .
H(42) C(29) 2.077 ? . .
H(42) C(30) 2.869 ? . .
H(42) C(31) 2.477 ? . .
H(42) C(60) 3.415 ? . 1_556
H(42) H(4) 3.258 ? . .
H(42) H(35) 3.529 ? . .
H(42) H(36) 2.609 ? . .
H(42) H(37) 3.510 ? . .
H(42) H(38) 2.301 ? . .
H(42) H(39) 2.642 ? . .
H(42) H(40) 3.418 ? . .
H(42) H(41) 1.600 ? . .
H(42) H(43) 1.600 ? . .
H(42) H(70) 3.446 ? . 1_556
H(42) H(75) 2.470 ? . 1_556
H(42) H(96) 2.786 ? . 1_456
H(42) H(100) 3.566 ? . 1_456
H(42) H(106) 2.845 ? . 1_556
H(43) C(9) 2.562 ? . .
H(43) C(10) 2.388 ? . .
H(43) C(29) 2.076 ? . .
H(43) C(30) 3.254 ? . .
H(43) C(31) 2.925 ? . .
H(43) H(4) 1.740 ? . .
H(43) H(36) 3.354 ? . .
H(43) H(37) 3.551 ? . .
H(43) H(38) 2.693 ? . .
H(43) H(39) 3.531 ? . .
H(43) H(41) 1.600 ? . .
H(43) H(42) 1.600 ? . .
H(43) H(46) 3.005 ? . .
H(43) H(63) 3.461 ? . .
H(43) H(70) 3.414 ? . 1_556
H(43) H(75) 3.465 ? . 1_556
H(43) H(95) 3.418 ? . 1_456
H(43) H(96) 3.539 ? . 1_456
H(44) Cl(8) 3.428 ? . 1_455
H(44) C(10) 3.432 ? . .
H(44) C(11) 2.939 ? . .
H(44) C(33) 2.027 ? . .
H(44) C(35) 3.270 ? . .
H(44) C(36) 2.430 ? . .
H(44) C(56) 3.347 ? . .
H(44) H(4) 3.178 ? . .
H(44) H(45) 1.600 ? . .
H(44) H(46) 1.600 ? . .
H(44) H(47) 3.410 ? . .
H(44) H(48) 3.580 ? . .
H(44) H(50) 3.360 ? . .
H(44) H(51) 2.224 ? . .
H(44) H(52) 2.645 ? . .
H(44) H(63) 3.357 ? . .
H(44) H(67) 2.396 ? . .
H(44) H(112) 3.484 ? . 1_455
H(45) Cl(5) 3.228 ? . 1_455
H(45) Cl(7) 3.553 ? . 1_455
H(45) C(11) 3.297 ? . .
H(45) C(33) 2.027 ? . .
H(45) C(35) 2.461 ? . .
H(45) C(36) 2.825 ? . .
H(45) C(74) 3.019 ? . 1_455
H(45) H(4) 3.297 ? . .
H(45) H(44) 1.600 ? . .
H(45) H(46) 1.600 ? . .
H(45) H(47) 2.281 ? . .
H(45) H(48) 2.662 ? . .
H(45) H(49) 3.393 ? . .
H(45) H(50) 3.468 ? . .
H(45) H(51) 2.583 ? . .
H(45) H(52) 3.483 ? . .
H(45) H(94) 2.751 ? . 1_456
H(45) H(108) 2.212 ? . 1_455
H(46) Cl(8) 3.509 ? . 1_455
H(46) C(10) 2.429 ? . .
H(46) C(11) 2.499 ? . .
H(46) C(33) 2.027 ? . .
H(46) C(35) 2.865 ? . .
H(46) C(36) 3.226 ? . .
H(46) C(68) 3.502 ? . 1_456
H(46) H(4) 1.854 ? . .
H(46) H(43) 3.005 ? . .
H(46) H(44) 1.600 ? . .
H(46) H(45) 1.600 ? . .
H(46) H(47) 2.635 ? . .
H(46) H(48) 3.508 ? . .
H(46) H(49) 3.518 ? . .
H(46) H(51) 3.352 ? . .
H(46) H(52) 3.545 ? . .
H(46) H(63) 3.348 ? . .
H(46) H(67) 3.563 ? . .
H(46) H(94) 2.900 ? . 1_456
H(46) H(95) 3.366 ? . 1_456
H(47) C(2) 3.553 ? . 1_455
H(47) C(3) 3.416 ? . 1_455
H(47) C(10) 3.319 ? . .
H(47) C(11) 2.892 ? . .
H(47) C(24) 3.522 ? . 1_455
H(47) C(33) 2.081 ? . .
H(47) C(34) 2.468 ? . .
H(47) C(36) 3.259 ? . .
H(47) H(1) 3.548 ? . 1_455
H(47) H(4) 3.118 ? . .
H(47) H(25) 2.626 ? . 1_455
H(47) H(28) 3.251 ? . 1_455
H(47) H(44) 3.410 ? . .
H(47) H(45) 2.281 ? . .
H(47) H(46) 2.635 ? . .
H(47) H(48) 1.600 ? . .
H(47) H(49) 1.600 ? . .
H(47) H(50) 3.378 ? . .
H(47) H(51) 3.560 ? . .
H(47) H(94) 3.522 ? . 1_456
H(47) H(108) 2.794 ? . 1_455
H(48) Cl(5) 3.307 ? . 1_455
H(48) C(11) 3.266 ? . .
H(48) C(33) 2.081 ? . .
H(48) C(34) 2.897 ? . .
H(48) C(36) 2.475 ? . .
H(48) C(72) 3.396 ? . 1_455
H(48) C(74) 3.381 ? . 1_455
H(48) H(25) 3.272 ? . 1_455
H(48) H(44) 3.580 ? . .
H(48) H(45) 2.662 ? . .
H(48) H(46) 3.508 ? . .
H(48) H(47) 1.600 ? . .
H(48) H(49) 1.600 ? . .
H(48) H(50) 2.240 ? . .
H(48) H(51) 2.704 ? . .
H(48) H(52) 3.401 ? . .
H(48) H(103) 3.111 ? . 1_455
H(48) H(104) 2.869 ? . 1_455
H(48) H(107) 3.423 ? . 1_455
H(48) H(108) 2.901 ? . 1_455
H(49) C(3) 3.245 ? . 1_455
H(49) C(4) 3.015 ? . 1_455
H(49) C(5) 3.365 ? . 1_455
H(49) C(10) 3.243 ? . .
H(49) C(11) 2.424 ? . .
H(49) C(12) 2.935 ? . .
H(49) C(25) 3.438 ? . 1_455
H(49) C(26) 3.430 ? . 1_455
H(49) C(28) 3.403 ? . 1_455
H(49) C(33) 2.081 ? . .
H(49) C(34) 3.248 ? . .
H(49) C(36) 2.911 ? . .
H(49) H(1) 3.555 ? . 1_455
H(49) H(4) 3.498 ? . .
H(49) H(5) 3.029 ? . .
H(49) H(28) 2.740 ? . 1_455
H(49) H(32) 2.876 ? . 1_455
H(49) H(34) 3.452 ? . 1_455
H(49) H(45) 3.393 ? . .
H(49) H(46) 3.518 ? . .
H(49) H(47) 1.600 ? . .
H(49) H(48) 1.600 ? . .
H(49) H(50) 2.678 ? . .
H(49) H(51) 3.560 ? . .
H(49) H(52) 3.555 ? . .
H(49) H(103) 3.442 ? . 1_455
H(50) Cl(3) 3.600 ? . .
H(50) C(11) 2.932 ? . .
H(50) C(12) 3.026 ? . .
H(50) C(33) 2.038 ? . .
H(50) C(34) 3.205 ? . .
H(50) C(35) 2.451 ? . .
H(50) C(71) 3.509 ? . 1_455
H(50) C(72) 3.041 ? . 1_455
H(50) H(5) 2.476 ? . .
H(50) H(44) 3.360 ? . .
H(50) H(45) 3.468 ? . .
H(50) H(47) 3.378 ? . .
H(50) H(48) 2.240 ? . .
H(50) H(49) 2.678 ? . .
H(50) H(51) 1.600 ? . .
H(50) H(52) 1.600 ? . .
H(50) H(99) 2.702 ? . 1_455
H(50) H(103) 2.350 ? . 1_455
H(50) H(104) 2.903 ? . 1_455
H(51) Cl(5) 3.250 ? . 1_455
H(51) C(11) 3.314 ? . .
H(51) C(33) 2.038 ? . .
H(51) C(34) 2.410 ? . .
H(51) C(35) 2.916 ? . .
H(51) H(5) 3.542 ? . .
H(51) H(44) 2.224 ? . .
H(51) H(45) 2.583 ? . .
H(51) H(46) 3.352 ? . .
H(51) H(47) 3.560 ? . .
H(51) H(48) 2.704 ? . .
H(51) H(49) 3.560 ? . .
H(51) H(50) 1.600 ? . .
H(51) H(52) 1.600 ? . .
H(51) H(54) 3.424 ? . .
H(51) H(55) 3.293 ? . .
H(51) H(67) 3.295 ? . .
H(51) H(86) 3.494 ? . .
H(51) H(99) 3.327 ? . 1_455
H(52) Cl(3) 2.931 ? . .
H(52) N(3) 3.309 ? . .
H(52) C(11) 2.521 ? . .
H(52) C(12) 2.626 ? . .
H(52) C(33) 2.038 ? . .
H(52) C(34) 2.868 ? . .
H(52) C(35) 3.263 ? . .
H(52) C(43) 3.137 ? . .
H(52) C(52) 3.490 ? . .
H(52) H(5) 2.249 ? . .
H(52) H(44) 2.645 ? . .
H(52) H(45) 3.483 ? . .
H(52) H(46) 3.545 ? . .
H(52) H(48) 3.401 ? . .
H(52) H(49) 3.555 ? . .
H(52) H(50) 1.600 ? . .
H(52) H(51) 1.600 ? . .
H(52) H(55) 3.136 ? . .
H(52) H(60) 2.630 ? . .
H(52) H(67) 2.824 ? . .
H(52) H(99) 3.555 ? . 1_455
H(53) C(37) 3.248 ? . .
H(53) C(38) 1.994 ? . .
H(53) C(40) 2.020 ? . .
H(53) C(41) 3.220 ? . .
H(53) C(57) 2.676 ? . .
H(53) C(58) 2.391 ? . .
H(53) C(61) 2.688 ? . .
H(53) C(62) 2.563 ? . .
H(53) C(63) 3.441 ? . .
H(53) H(12) 3.373 ? . 1_545
H(53) H(69) 2.648 ? . .
H(53) H(70) 3.257 ? . .
H(53) H(71) 1.739 ? . .
H(53) H(78) 3.112 ? . .
H(53) H(79) 3.267 ? . .
H(53) H(80) 1.812 ? . .
H(53) H(81) 3.255 ? . .
H(53) H(101) 3.039 ? . 1_455
H(54) Cl(1) 3.133 ? . 1_545
H(54) C(37) 3.306 ? . .
H(54) C(39) 3.238 ? . .
H(54) C(40) 2.033 ? . .
H(54) C(42) 2.079 ? . .
H(54) C(43) 2.569 ? . .
H(54) C(61) 2.716 ? . .
H(54) C(63) 3.257 ? . .
H(54) C(64) 2.635 ? . .
H(54) H(8) 2.886 ? . 1_545
H(54) H(51) 3.424 ? . .
H(54) H(55) 2.315 ? . .
H(54) H(83) 2.827 ? . .
H(54) H(84) 2.457 ? . .
H(54) H(86) 2.422 ? . .
H(55) Cl(1) 2.794 ? . 1_545
H(55) N(3) 1.931 ? . .
H(55) C(37) 3.315 ? . .
H(55) C(41) 2.541 ? . .
H(55) C(42) 2.078 ? . .
H(55) C(51) 2.575 ? . .
H(55) C(56) 2.470 ? . .
H(55) H(8) 3.529 ? . 1_545
H(55) H(16) 3.496 ? . 1_545
H(55) H(51) 3.293 ? . .
H(55) H(52) 3.136 ? . .
H(55) H(54) 2.315 ? . .
H(55) H(59) 3.200 ? . .
H(55) H(67) 2.317 ? . .
H(55) H(68) 2.240 ? . .
H(56) C(44) 3.244 ? . .
H(56) C(45) 1.996 ? . .
H(56) C(47) 2.046 ? . .
H(56) C(48) 3.217 ? . .
H(56) C(65) 2.671 ? . .
H(56) C(68) 2.412 ? . .
H(56) C(69) 2.712 ? . .
H(56) C(70) 2.668 ? . .
H(56) C(71) 3.289 ? . .
H(56) H(14) 3.241 ? . .
H(56) H(78) 3.318 ? . 1_655
H(56) H(89) 3.555 ? . .
H(56) H(93) 2.648 ? . .
H(56) H(94) 3.292 ? . .
H(56) H(95) 1.789 ? . .
H(56) H(96) 2.518 ? . .
H(56) H(98) 2.435 ? . .
H(56) H(101) 2.878 ? . .
H(57) Cl(2) 2.871 ? . .
H(57) Cl(5) 3.301 ? . .
H(57) C(44) 3.288 ? . .
H(57) C(46) 3.229 ? . .
H(57) C(47) 2.016 ? . .
H(57) C(49) 2.028 ? . .
H(57) C(50) 2.527 ? . .
H(57) C(69) 2.717 ? . .
H(57) C(71) 3.458 ? . .
H(57) C(72) 2.590 ? . .
H(57) H(7) 3.115 ? . .
H(57) H(58) 2.272 ? . .
H(57) H(85) 3.355 ? . 1_655
H(57) H(86) 3.121 ? . 1_655
H(57) H(99) 3.270 ? . .
H(57) H(102) 3.084 ? . .
H(57) H(103) 3.334 ? . .
H(57) H(104) 1.853 ? . .
H(58) Cl(2) 2.817 ? . .
H(58) Cl(5) 3.094 ? . .
H(58) N(4) 1.921 ? . .
H(58) C(44) 3.327 ? . .
H(58) C(48) 2.515 ? . .
H(58) C(49) 2.021 ? . .
H(58) C(52) 2.559 ? . .
H(58) C(53) 2.487 ? . .
H(58) H(57) 2.272 ? . .
H(58) H(60) 3.100 ? . .
H(58) H(61) 2.407 ? . .
H(58) H(62) 2.201 ? . .
H(58) H(85) 3.357 ? . 1_655
H(59) Mn(2) 3.125 ? . .
H(59) Cl(4) 2.862 ? . .
H(59) N(3) 2.043 ? . .
H(59) N(4) 2.603 ? . .
H(59) C(5) 2.926 ? . 1_545
H(59) C(6) 3.086 ? . 1_545
H(59) C(7) 3.319 ? . 1_545
H(59) C(43) 3.041 ? . .
H(59) C(50) 3.575 ? . .
H(59) C(52) 2.092 ? . .
H(59) C(53) 2.708 ? . .
H(59) C(54) 3.201 ? . .
H(59) C(55) 2.655 ? . .
H(59) C(56) 2.059 ? . .
H(59) H(2) 2.839 ? . 1_545
H(59) H(3) 3.182 ? . 1_545
H(59) H(55) 3.200 ? . .
H(59) H(60) 2.892 ? . .
H(59) H(61) 2.566 ? . .
H(59) H(65) 2.491 ? . .
H(59) H(66) 3.564 ? . .
H(59) H(67) 2.865 ? . .
H(59) H(68) 2.355 ? . .
H(60) Mn(2) 3.142 ? . .
H(60) Cl(3) 2.926 ? . .
H(60) N(3) 2.587 ? . .
H(60) N(4) 2.026 ? . .
H(60) C(11) 3.177 ? . .
H(60) C(12) 2.834 ? . .
H(60) C(13) 3.260 ? . .
H(60) C(36) 3.532 ? . .
H(60) C(43) 3.433 ? . .
H(60) C(50) 2.953 ? . .
H(60) C(51) 2.095 ? . .
H(60) C(53) 2.072 ? . .
H(60) C(54) 2.702 ? . .
H(60) C(55) 3.276 ? . .
H(60) C(56) 2.737 ? . .
H(60) H(5) 2.898 ? . .
H(60) H(52) 2.630 ? . .
H(60) H(58) 3.100 ? . .
H(60) H(59) 2.892 ? . .
H(60) H(61) 2.873 ? . .
H(60) H(62) 2.352 ? . .
H(60) H(63) 2.549 ? . .
H(60) H(67) 2.577 ? . .
H(61) Cl(5) 3.183 ? . .
H(61) Cl(6) 3.423 ? . .
H(61) N(4) 2.724 ? . .
H(61) C(27) 3.191 ? . 1_545
H(61) C(50) 2.881 ? . .
H(61) C(51) 2.743 ? . .
H(61) C(52) 2.077 ? . .
H(61) C(54) 2.059 ? . .
H(61) C(55) 2.754 ? . .
H(61) C(56) 3.311 ? . .
H(61) C(74) 3.574 ? . .
H(61) H(29) 2.904 ? . 1_545
H(61) H(31) 2.601 ? . 1_545
H(61) H(58) 2.407 ? . .
H(61) H(59) 2.566 ? . .
H(61) H(60) 2.873 ? . .
H(61) H(62) 1.603 ? . .
H(61) H(63) 2.854 ? . .
H(61) H(64) 2.334 ? . .
H(61) H(65) 2.616 ? . .
H(61) H(107) 3.579 ? . .
H(62) Cl(2) 3.179 ? . .
H(62) Cl(5) 3.535 ? . .
H(62) N(4) 2.808 ? . .
H(62) C(8) 3.449 ? . .
H(62) C(13) 3.588 ? . .
H(62) C(50) 2.813 ? . .
H(62) C(51) 3.368 ? . .
H(62) C(52) 2.077 ? . .
H(62) C(54) 2.059 ? . .
H(62) C(55) 3.365 ? . .
H(62) C(74) 3.462 ? . .
H(62) H(38) 3.583 ? . .
H(62) H(40) 3.007 ? . .
H(62) H(58) 2.201 ? . .
H(62) H(60) 2.352 ? . .
H(62) H(61) 1.603 ? . .
H(62) H(63) 2.329 ? . .
H(62) H(64) 2.363 ? . .
H(62) H(107) 3.025 ? . .
H(63) C(9) 3.270 ? . .
H(63) C(10) 2.936 ? . .
H(63) C(11) 3.251 ? . .
H(63) C(51) 3.240 ? . .
H(63) C(52) 2.712 ? . .
H(63) C(53) 2.053 ? . .
H(63) C(55) 2.069 ? . .
H(63) C(56) 2.700 ? . .
H(63) H(4) 3.068 ? . .
H(63) H(38) 3.166 ? . .
H(63) H(40) 3.533 ? . .
H(63) H(43) 3.461 ? . .
H(63) H(44) 3.357 ? . .
H(63) H(46) 3.348 ? . .
H(63) H(60) 2.549 ? . .
H(63) H(61) 2.854 ? . .
H(63) H(62) 2.329 ? . .
H(63) H(64) 1.600 ? . .
H(63) H(65) 2.868 ? . .
H(63) H(66) 2.353 ? . .
H(63) H(67) 2.546 ? . .
H(63) H(70) 3.225 ? . 1_556
H(64) Cl(6) 2.992 ? . .
H(64) C(31) 3.524 ? . .
H(64) C(52) 3.340 ? . .
H(64) C(53) 2.053 ? . .
H(64) C(55) 2.069 ? . .
H(64) C(56) 3.330 ? . .
H(64) C(58) 3.349 ? . 1_556
H(64) H(31) 3.546 ? . 1_545
H(64) H(38) 2.807 ? . .
H(64) H(40) 3.400 ? . .
H(64) H(61) 2.334 ? . .
H(64) H(62) 2.363 ? . .
H(64) H(63) 1.600 ? . .
H(64) H(65) 2.358 ? . .
H(64) H(66) 2.373 ? . .
H(64) H(67) 3.598 ? . .
H(64) H(69) 3.368 ? . 1_556
H(64) H(70) 2.517 ? . 1_556
H(64) H(73) 3.572 ? . 1_556
H(65) C(1) 3.270 ? . 1_545
H(65) C(2) 3.107 ? . 1_545
H(65) C(3) 3.014 ? . 1_545
H(65) C(4) 3.179 ? . 1_545
H(65) C(5) 3.286 ? . 1_545
H(65) C(6) 3.362 ? . 1_545
H(65) C(51) 2.685 ? . .
H(65) C(52) 3.292 ? . .
H(65) C(53) 2.749 ? . .
H(65) C(54) 2.076 ? . .
H(65) C(56) 2.056 ? . .
H(65) H(1) 3.426 ? . 1_545
H(65) H(20) 3.596 ? . 1_545
H(65) H(22) 3.524 ? . 1_545
H(65) H(31) 2.902 ? . 1_545
H(65) H(59) 2.491 ? . .
H(65) H(61) 2.616 ? . .
H(65) H(63) 2.868 ? . .
H(65) H(64) 2.358 ? . .
H(65) H(66) 1.603 ? . .
H(65) H(67) 2.857 ? . .
H(65) H(68) 2.342 ? . .
H(66) Cl(8) 3.163 ? . 1_455
H(66) C(23) 3.380 ? . 1_545
H(66) C(51) 3.324 ? . .
H(66) C(53) 3.363 ? . .
H(66) C(54) 2.075 ? . .
H(66) C(56) 2.056 ? . .
H(66) C(58) 3.415 ? . 1_556
H(66) H(20) 2.938 ? . 1_545
H(66) H(22) 2.980 ? . 1_545
H(66) H(59) 3.564 ? . .
H(66) H(63) 2.353 ? . .
H(66) H(64) 2.373 ? . .
H(66) H(65) 1.603 ? . .
H(66) H(67) 2.343 ? . .
H(66) H(68) 2.366 ? . .
H(66) H(69) 2.963 ? . 1_556
H(66) H(70) 3.057 ? . 1_556
H(66) H(112) 3.359 ? . 1_455
H(67) N(3) 2.753 ? . .
H(67) C(34) 3.258 ? . .
H(67) C(36) 3.377 ? . .
H(67) C(43) 2.825 ? . .
H(67) C(51) 2.068 ? . .
H(67) C(52) 2.748 ? . .
H(67) C(53) 3.282 ? . .
H(67) C(54) 2.701 ? . .
H(67) C(55) 2.057 ? . .
H(67) H(44) 2.396 ? . .
H(67) H(46) 3.563 ? . .
H(67) H(51) 3.295 ? . .
H(67) H(52) 2.824 ? . .
H(67) H(55) 2.317 ? . .
H(67) H(59) 2.865 ? . .
H(67) H(60) 2.577 ? . .
H(67) H(63) 2.546 ? . .
H(67) H(64) 3.598 ? . .
H(67) H(65) 2.857 ? . .
H(67) H(66) 2.343 ? . .
H(67) H(68) 1.604 ? . .
H(67) H(112) 3.537 ? . 1_455
H(68) Cl(1) 2.941 ? . 1_545
H(68) O(1) 3.186 ? . 1_545
H(68) N(3) 2.801 ? . .
H(68) C(1) 3.031 ? . 1_545
H(68) C(6) 3.032 ? . 1_545
H(68) C(7) 3.285 ? . 1_545
H(68) C(43) 2.827 ? . .
H(68) C(51) 2.068 ? . .
H(68) C(52) 3.388 ? . .
H(68) C(54) 3.338 ? . .
H(68) C(55) 2.057 ? . .
H(68) H(22) 3.345 ? . 1_545
H(68) H(55) 2.240 ? . .
H(68) H(59) 2.355 ? . .
H(68) H(65) 2.342 ? . .
H(68) H(66) 2.366 ? . .
H(68) H(67) 1.604 ? . .
H(68) H(112) 3.327 ? . 1_455
H(69) Cl(8) 3.520 ? . 1_454
H(69) C(23) 3.508 ? . 1_544
H(69) C(38) 2.968 ? . .
H(69) C(39) 3.148 ? . .
H(69) C(57) 2.098 ? . .
H(69) C(59) 2.457 ? . .
H(69) C(60) 3.264 ? . .
H(69) H(18) 3.478 ? . 1_544
H(69) H(19) 3.409 ? . 1_544
H(69) H(20) 2.537 ? . 1_544
H(69) H(53) 2.648 ? . .
H(69) H(64) 3.368 ? . 1_554
H(69) H(66) 2.963 ? . 1_554
H(69) H(70) 1.600 ? . .
H(69) H(71) 1.600 ? . .
H(69) H(72) 3.396 ? . .
H(69) H(73) 2.241 ? . .
H(69) H(74) 2.641 ? . .
H(69) H(75) 3.371 ? . .
H(69) H(76) 3.558 ? . .
H(70) C(38) 3.342 ? . .
H(70) C(54) 3.205 ? . 1_554
H(70) C(55) 3.569 ? . 1_554
H(70) C(57) 2.098 ? . .
H(70) C(59) 2.878 ? . .
H(70) C(60) 2.461 ? . .
H(70) H(38) 2.873 ? . 1_554
H(70) H(42) 3.446 ? . 1_554
H(70) H(43) 3.414 ? . 1_554
H(70) H(53) 3.257 ? . .
H(70) H(63) 3.225 ? . 1_554
H(70) H(64) 2.517 ? . 1_554
H(70) H(66) 3.057 ? . 1_554
H(70) H(69) 1.600 ? . .
H(70) H(71) 1.600 ? . .
H(70) H(72) 3.551 ? . .
H(70) H(73) 2.615 ? . .
H(70) H(74) 3.505 ? . .
H(70) H(75) 2.244 ? . .
H(70) H(76) 2.647 ? . .
H(70) H(77) 3.399 ? . .
H(71) Cl(8) 3.185 ? . 1_454
H(71) C(38) 2.547 ? . .
H(71) C(39) 2.378 ? . .
H(71) C(57) 2.098 ? . .
H(71) C(59) 3.261 ? . .
H(71) C(60) 2.878 ? . .
H(71) H(53) 1.739 ? . .
H(71) H(69) 1.600 ? . .
H(71) H(70) 1.600 ? . .
H(71) H(73) 3.369 ? . .
H(71) H(74) 3.551 ? . .
H(71) H(75) 2.613 ? . .
H(71) H(76) 3.508 ? . .
H(71) H(77) 3.548 ? . .
H(71) H(80) 2.894 ? . .
H(71) H(101) 3.487 ? . 1_455
H(72) O(3) 2.555 ? . .
H(72) C(37) 3.118 ? . .
H(72) C(38) 2.941 ? . .
H(72) C(57) 2.049 ? . .
H(72) C(58) 3.267 ? . .
H(72) C(60) 2.522 ? . .
H(72) C(67) 3.223 ? . .
H(72) C(75) 3.137 ? . 1_554
H(72) H(69) 3.396 ? . .
H(72) H(70) 3.551 ? . .
H(72) H(73) 1.600 ? . .
H(72) H(74) 1.600 ? . .
H(72) H(75) 3.444 ? . .
H(72) H(76) 2.328 ? . .
H(72) H(77) 2.751 ? . .
H(72) H(87) 3.432 ? . .
H(72) H(91) 2.622 ? . .
H(72) H(92) 2.940 ? . .
H(72) H(109) 2.757 ? . 1_554
H(72) H(110) 2.808 ? . 1_554
H(73) Cl(6) 3.380 ? . 1_554
H(73) C(38) 3.312 ? . .
H(73) C(57) 2.049 ? . .
H(73) C(58) 2.431 ? . .
H(73) C(60) 2.898 ? . .
H(73) H(19) 3.186 ? . 1_544
H(73) H(64) 3.572 ? . 1_554
H(73) H(69) 2.241 ? . .
H(73) H(70) 2.615 ? . .
H(73) H(71) 3.369 ? . .
H(73) H(72) 1.600 ? . .
H(73) H(74) 1.600 ? . .
H(73) H(75) 3.532 ? . .
H(73) H(76) 2.678 ? . .
H(73) H(77) 3.556 ? . .
H(73) H(91) 3.493 ? . .
H(73) H(109) 3.462 ? . 1_554
H(74) Cl(9) 3.226 ? . 1_554
H(74) O(3) 3.022 ? . .
H(74) C(19) 3.337 ? . 1_545
H(74) C(37) 3.008 ? . .
H(74) C(38) 2.513 ? . .
H(74) C(39) 3.443 ? . .
H(74) C(57) 2.049 ? . .
H(74) C(58) 2.880 ? . .
H(74) C(60) 3.289 ? . .
H(74) C(75) 3.443 ? . 1_554
H(74) H(12) 3.453 ? . 1_545
H(74) H(13) 2.466 ? . 1_545
H(74) H(16) 3.432 ? . 1_545
H(74) H(18) 3.380 ? . 1_544
H(74) H(19) 3.241 ? . 1_544
H(74) H(69) 2.641 ? . .
H(74) H(70) 3.505 ? . .
H(74) H(71) 3.551 ? . .
H(74) H(72) 1.600 ? . .
H(74) H(73) 1.600 ? . .
H(74) H(76) 3.431 ? . .
H(74) H(109) 3.449 ? . 1_554
H(74) H(110) 3.072 ? . 1_554
H(75) C(31) 3.443 ? . 1_554
H(75) C(32) 3.336 ? . 1_554
H(75) C(38) 2.922 ? . .
H(75) C(57) 2.051 ? . .
H(75) C(58) 2.432 ? . .
H(75) C(59) 3.268 ? . .
H(75) C(73) 3.505 ? . .
H(75) H(38) 2.715 ? . 1_554
H(75) H(39) 3.408 ? . 1_554
H(75) H(42) 2.470 ? . 1_554
H(75) H(43) 3.465 ? . 1_554
H(75) H(69) 3.371 ? . .
H(75) H(70) 2.244 ? . .
H(75) H(71) 2.613 ? . .
H(75) H(72) 3.444 ? . .
H(75) H(73) 3.532 ? . .
H(75) H(76) 1.600 ? . .
H(75) H(77) 1.600 ? . .
H(75) H(87) 3.428 ? . .
H(75) H(100) 3.112 ? . 1_455
H(75) H(101) 3.552 ? . 1_455
H(75) H(105) 3.360 ? . .
H(75) H(106) 2.803 ? . .
H(76) Cl(6) 3.301 ? . 1_554
H(76) O(3) 3.450 ? . .
H(76) C(31) 3.597 ? . 1_554
H(76) C(38) 3.302 ? . .
H(76) C(57) 2.051 ? . .
H(76) C(58) 2.885 ? . .
H(76) C(59) 2.496 ? . .
H(76) C(66) 3.138 ? . .
H(76) H(38) 2.872 ? . 1_554
H(76) H(39) 3.442 ? . 1_554
H(76) H(69) 3.558 ? . .
H(76) H(70) 2.647 ? . .
H(76) H(71) 3.508 ? . .
H(76) H(72) 2.328 ? . .
H(76) H(73) 2.678 ? . .
H(76) H(74) 3.431 ? . .
H(76) H(75) 1.600 ? . .
H(76) H(77) 1.600 ? . .
H(76) H(87) 2.313 ? . .
H(76) H(88) 3.164 ? . .
H(76) H(91) 2.961 ? . .
H(77) Mn(2) 3.540 ? . .
H(77) Cl(3) 3.101 ? . .
H(77) O(3) 2.448 ? . .
H(77) O(4) 3.418 ? . .
H(77) C(37) 2.621 ? . .
H(77) C(38) 2.493 ? . .
H(77) C(57) 2.051 ? . .
H(77) C(58) 3.268 ? . .
H(77) C(59) 2.945 ? . .
H(77) C(66) 3.554 ? . .
H(77) C(73) 3.287 ? . .
H(77) H(70) 3.399 ? . .
H(77) H(71) 3.548 ? . .
H(77) H(72) 2.751 ? . .
H(77) H(73) 3.556 ? . .
H(77) H(75) 1.600 ? . .
H(77) H(76) 1.600 ? . .
H(77) H(87) 2.589 ? . .
H(77) H(100) 3.237 ? . 1_455
H(77) H(105) 2.721 ? . .
H(77) H(106) 2.929 ? . .
H(78) C(39) 3.383 ? . .
H(78) C(40) 2.963 ? . .
H(78) C(44) 3.010 ? . 1_455
H(78) C(45) 2.916 ? . 1_455
H(78) C(46) 2.833 ? . 1_455
H(78) C(47) 2.950 ? . 1_455
H(78) C(48) 3.032 ? . 1_455
H(78) C(49) 3.103 ? . 1_455
H(78) C(61) 2.058 ? . .
H(78) C(63) 3.318 ? . .
H(78) C(64) 2.413 ? . .
H(78) C(71) 3.471 ? . 1_455
H(78) H(53) 3.112 ? . .
H(78) H(56) 3.318 ? . 1_455
H(78) H(79) 1.600 ? . .
H(78) H(80) 1.600 ? . .
H(78) H(81) 3.497 ? . .
H(78) H(82) 3.586 ? . .
H(78) H(84) 3.349 ? . .
H(78) H(85) 2.197 ? . .
H(78) H(86) 2.614 ? . .
H(78) H(90) 3.559 ? . 1_455
H(78) H(92) 3.390 ? . 1_455
H(78) H(99) 3.594 ? . 1_455
H(78) H(101) 2.708 ? . 1_455
H(79) Cl(4) 3.434 ? . 1_455
H(79) Cl(10) 3.019 ? . 1_454
H(79) C(40) 3.325 ? . .
H(79) C(61) 2.058 ? . .
H(79) C(63) 2.536 ? . .
H(79) C(64) 2.875 ? . .
H(79) C(67) 3.547 ? . 1_455
H(79) H(53) 3.267 ? . .
H(79) H(78) 1.600 ? . .
H(79) H(80) 1.600 ? . .
H(79) H(81) 2.388 ? . .
H(79) H(82) 2.709 ? . .
H(79) H(83) 3.470 ? . .
H(79) H(84) 3.538 ? . .
H(79) H(85) 2.631 ? . .
H(79) H(86) 3.510 ? . .
H(79) H(90) 3.205 ? . 1_455
H(79) H(92) 3.037 ? . 1_455
H(80) Cl(8) 3.482 ? . 1_454
H(80) C(39) 2.413 ? . .
H(80) C(40) 2.537 ? . .
H(80) C(61) 2.058 ? . .
H(80) C(63) 2.973 ? . .
H(80) C(64) 3.248 ? . .
H(80) H(53) 1.812 ? . .
H(80) H(71) 2.894 ? . .
H(80) H(78) 1.600 ? . .
H(80) H(79) 1.600 ? . .
H(80) H(81) 2.780 ? . .
H(80) H(82) 3.578 ? . .
H(80) H(85) 3.364 ? . .
H(80) H(86) 3.535 ? . .
H(80) H(90) 3.447 ? . 1_455
H(80) H(101) 2.982 ? . 1_455
H(81) Cl(10) 3.103 ? . 1_454
H(81) Cl(11) 3.290 ? . 1_545
H(81) Cl(12) 3.317 ? . 1_545
H(81) C(39) 3.434 ? . .
H(81) C(40) 2.924 ? . .
H(81) C(61) 2.087 ? . .
H(81) C(62) 2.571 ? . .
H(81) C(64) 3.314 ? . .
H(81) H(9) 3.013 ? . 1_545
H(81) H(12) 3.035 ? . 1_545
H(81) H(53) 3.255 ? . .
H(81) H(78) 3.497 ? . .
H(81) H(79) 2.388 ? . .
H(81) H(80) 2.780 ? . .
H(81) H(82) 1.600 ? . .
H(81) H(83) 1.600 ? . .
H(81) H(84) 3.434 ? . .
H(82) Cl(11) 3.154 ? . 1_545
H(82) C(28) 2.942 ? . 1_445
H(82) C(40) 3.303 ? . .
H(82) C(61) 2.087 ? . .
H(82) C(62) 2.936 ? . .
H(82) C(64) 2.515 ? . .
H(82) H(9) 3.377 ? . 1_545
H(82) H(32) 3.430 ? . 1_445
H(82) H(33) 2.514 ? . 1_445
H(82) H(34) 2.537 ? . 1_445
H(82) H(78) 3.586 ? . .
H(82) H(79) 2.709 ? . .
H(82) H(80) 3.578 ? . .
H(82) H(81) 1.600 ? . .
H(82) H(83) 1.600 ? . .
H(82) H(84) 2.307 ? . .
H(82) H(85) 2.728 ? . .
H(82) H(86) 3.443 ? . .
H(83) Cl(11) 3.482 ? . 1_545
H(83) C(16) 3.122 ? . 1_545
H(83) C(17) 2.905 ? . 1_545
H(83) C(18) 3.186 ? . 1_545
H(83) C(28) 3.598 ? . 1_445
H(83) C(39) 3.413 ? . .
H(83) C(40) 2.486 ? . .
H(83) C(41) 2.880 ? . .
H(83) C(61) 2.087 ? . .
H(83) C(62) 3.329 ? . .
H(83) C(64) 2.928 ? . .
H(83) H(8) 2.516 ? . 1_545
H(83) H(9) 2.315 ? . 1_545
H(83) H(12) 2.598 ? . 1_545
H(83) H(33) 2.909 ? . 1_445
H(83) H(34) 3.568 ? . 1_445
H(83) H(54) 2.827 ? . .
H(83) H(79) 3.470 ? . .
H(83) H(81) 1.600 ? . .
H(83) H(82) 1.600 ? . .
H(83) H(84) 2.690 ? . .
H(83) H(85) 3.570 ? . .
H(83) H(86) 3.580 ? . .
H(84) C(27) 3.053 ? . 1_445
H(84) C(28) 3.021 ? . 1_445
H(84) C(40) 2.942 ? . .
H(84) C(41) 3.006 ? . .
H(84) C(61) 2.083 ? . .
H(84) C(62) 3.246 ? . .
H(84) C(63) 2.500 ? . .
H(84) H(29) 2.288 ? . 1_445
H(84) H(30) 3.120 ? . 1_445
H(84) H(33) 2.218 ? . 1_445
H(84) H(34) 3.135 ? . 1_445
H(84) H(54) 2.457 ? . .
H(84) H(78) 3.349 ? . .
H(84) H(79) 3.538 ? . .
H(84) H(81) 3.434 ? . .
H(84) H(82) 2.307 ? . .
H(84) H(83) 2.690 ? . .
H(84) H(85) 1.600 ? . .
H(84) H(86) 1.600 ? . .
H(85) Cl(4) 3.315 ? . 1_455
H(85) C(40) 3.321 ? . .
H(85) C(48) 3.243 ? . 1_455
H(85) C(49) 3.076 ? . 1_455
H(85) C(50) 3.205 ? . 1_455
H(85) C(61) 2.083 ? . .
H(85) C(62) 2.428 ? . .
H(85) C(63) 2.951 ? . .
H(85) H(29) 2.844 ? . 1_445
H(85) H(33) 3.500 ? . 1_445
H(85) H(57) 3.355 ? . 1_455
H(85) H(58) 3.357 ? . 1_455
H(85) H(78) 2.197 ? . .
H(85) H(79) 2.631 ? . .
H(85) H(80) 3.364 ? . .
H(85) H(82) 2.728 ? . .
H(85) H(83) 3.570 ? . .
H(85) H(84) 1.600 ? . .
H(85) H(86) 1.600 ? . .
H(86) Cl(5) 3.354 ? . 1_455
H(86) C(40) 2.518 ? . .
H(86) C(41) 2.668 ? . .
H(86) C(48) 3.288 ? . 1_455
H(86) C(61) 2.083 ? . .
H(86) C(62) 2.873 ? . .
H(86) C(63) 3.304 ? . .
H(86) C(71) 3.514 ? . 1_455
H(86) H(29) 3.338 ? . 1_445
H(86) H(51) 3.494 ? . .
H(86) H(54) 2.422 ? . .
H(86) H(57) 3.121 ? . 1_455
H(86) H(78) 2.614 ? . .
H(86) H(79) 3.510 ? . .
H(86) H(80) 3.535 ? . .
H(86) H(82) 3.443 ? . .
H(86) H(83) 3.580 ? . .
H(86) H(84) 1.600 ? . .
H(86) H(85) 1.600 ? . .
H(86) H(99) 2.911 ? . 1_455
H(86) H(101) 3.314 ? . 1_455
H(87) O(4) 2.597 ? . .
H(87) C(44) 3.108 ? . .
H(87) C(45) 2.909 ? . .
H(87) C(60) 2.872 ? . .
H(87) C(65) 2.055 ? . .
H(87) C(67) 2.538 ? . .
H(87) C(68) 3.263 ? . .
H(87) H(24) 3.482 ? . 1_554
H(87) H(72) 3.432 ? . .
H(87) H(75) 3.428 ? . .
H(87) H(76) 2.313 ? . .
H(87) H(77) 2.589 ? . .
H(87) H(88) 1.600 ? . .
H(87) H(89) 1.600 ? . .
H(87) H(90) 3.463 ? . .
H(87) H(91) 2.360 ? . .
H(87) H(92) 2.750 ? . .
H(87) H(93) 3.366 ? . .
H(87) H(94) 3.564 ? . .
H(87) H(105) 2.891 ? . .
H(88) C(24) 2.912 ? . 1_554
H(88) C(45) 3.282 ? . .
H(88) C(65) 2.055 ? . .
H(88) C(67) 2.922 ? . .
H(88) C(68) 2.412 ? . .
H(88) H(17) 3.458 ? . 1_554
H(88) H(23) 3.268 ? . 1_554
H(88) H(24) 2.017 ? . 1_554
H(88) H(25) 3.163 ? . 1_554
H(88) H(39) 3.401 ? . 1_554
H(88) H(76) 3.164 ? . .
H(88) H(87) 1.600 ? . .
H(88) H(89) 1.600 ? . .
H(88) H(90) 3.568 ? . .
H(88) H(91) 2.704 ? . .
H(88) H(92) 3.566 ? . .
H(88) H(93) 2.192 ? . .
H(88) H(94) 2.622 ? . .
H(88) H(95) 3.346 ? . .
H(88) H(108) 3.534 ? . 1_554
H(89) Cl(12) 3.345 ? . .
H(89) O(4) 3.133 ? . .
H(89) C(17) 3.592 ? . .
H(89) C(18) 3.529 ? . .
H(89) C(44) 3.020 ? . .
H(89) C(45) 2.482 ? . .
H(89) C(46) 3.334 ? . .
H(89) C(65) 2.055 ? . .
H(89) C(67) 3.316 ? . .
H(89) C(68) 2.865 ? . .
H(89) H(10) 2.941 ? . .
H(89) H(11) 2.869 ? . .
H(89) H(14) 3.359 ? . .
H(89) H(24) 2.924 ? . 1_554
H(89) H(56) 3.555 ? . .
H(89) H(87) 1.600 ? . .
H(89) H(88) 1.600 ? . .
H(89) H(91) 3.463 ? . .
H(89) H(93) 2.612 ? . .
H(89) H(94) 3.510 ? . .
H(89) H(95) 3.520 ? . .
H(89) H(105) 2.997 ? . .
H(90) Cl(7) 3.216 ? . 1_554
H(90) Cl(8) 3.159 ? . 1_554
H(90) C(45) 2.932 ? . .
H(90) C(62) 3.598 ? . 1_655
H(90) C(65) 2.077 ? . .
H(90) C(66) 3.297 ? . .
H(90) C(68) 2.508 ? . .
H(90) C(75) 3.547 ? . 1_554
H(90) H(78) 3.559 ? . 1_655
H(90) H(79) 3.205 ? . 1_655
H(90) H(80) 3.447 ? . 1_655
H(90) H(87) 3.463 ? . .
H(90) H(88) 3.568 ? . .
H(90) H(91) 1.600 ? . .
H(90) H(92) 1.600 ? . .
H(90) H(93) 3.437 ? . .
H(90) H(94) 2.307 ? . .
H(90) H(95) 2.717 ? . .
H(90) H(109) 2.703 ? . 1_554
H(91) Cl(6) 3.046 ? . 1_554
H(91) Cl(7) 3.549 ? . 1_554
H(91) O(4) 3.352 ? . .
H(91) C(45) 3.307 ? . .
H(91) C(59) 3.454 ? . .
H(91) C(65) 2.077 ? . .
H(91) C(66) 2.527 ? . .
H(91) C(68) 2.915 ? . .
H(91) H(72) 2.622 ? . .
H(91) H(73) 3.493 ? . .
H(91) H(76) 2.961 ? . .
H(91) H(87) 2.360 ? . .
H(91) H(88) 2.704 ? . .
H(91) H(89) 3.463 ? . .
H(91) H(90) 1.600 ? . .
H(91) H(92) 1.600 ? . .
H(91) H(93) 3.568 ? . .
H(91) H(94) 2.672 ? . .
H(91) H(95) 3.557 ? . .
H(91) H(109) 2.730 ? . 1_554
H(92) Mn(2) 3.573 ? . .
H(92) Cl(4) 3.440 ? . .
H(92) O(3) 3.564 ? . .
H(92) O(4) 2.264 ? . .
H(92) C(44) 2.602 ? . .
H(92) C(45) 2.518 ? . .
H(92) C(65) 2.077 ? . .
H(92) C(66) 2.957 ? . .
H(92) C(68) 3.322 ? . .
H(92) C(75) 3.215 ? . 1_554
H(92) H(72) 2.940 ? . .
H(92) H(78) 3.390 ? . 1_655
H(92) H(79) 3.037 ? . 1_655
H(92) H(87) 2.750 ? . .
H(92) H(88) 3.566 ? . .
H(92) H(90) 1.600 ? . .
H(92) H(91) 1.600 ? . .
H(92) H(94) 3.440 ? . .
H(92) H(109) 2.593 ? . 1_554
H(92) H(110) 3.024 ? . 1_554
H(93) C(22) 3.446 ? . 1_554
H(93) C(24) 3.376 ? . 1_554
H(93) C(45) 2.981 ? . .
H(93) C(46) 3.154 ? . .
H(93) C(65) 2.106 ? . .
H(93) C(66) 2.426 ? . .
H(93) C(67) 3.302 ? . .
H(93) H(17) 2.529 ? . 1_554
H(93) H(24) 2.694 ? . 1_554
H(93) H(25) 3.268 ? . 1_554
H(93) H(56) 2.648 ? . .
H(93) H(87) 3.366 ? . .
H(93) H(88) 2.192 ? . .
H(93) H(89) 2.612 ? . .
H(93) H(90) 3.437 ? . .
H(93) H(91) 3.568 ? . .
H(93) H(94) 1.600 ? . .
H(93) H(95) 1.600 ? . .
H(94) C(34) 3.271 ? . 1_654
H(94) C(45) 3.335 ? . .
H(94) C(65) 2.106 ? . .
H(94) C(66) 2.887 ? . .
H(94) C(67) 2.500 ? . .
H(94) H(24) 3.542 ? . 1_554
H(94) H(45) 2.751 ? . 1_654
H(94) H(46) 2.900 ? . 1_654
H(94) H(47) 3.522 ? . 1_654
H(94) H(56) 3.292 ? . .
H(94) H(87) 3.564 ? . .
H(94) H(88) 2.622 ? . .
H(94) H(89) 3.510 ? . .
H(94) H(90) 2.307 ? . .
H(94) H(91) 2.672 ? . .
H(94) H(92) 3.440 ? . .
H(94) H(93) 1.600 ? . .
H(94) H(95) 1.600 ? . .
H(94) H(108) 2.906 ? . 1_554
H(95) C(45) 2.560 ? . .
H(95) C(46) 2.425 ? . .
H(95) C(65) 2.106 ? . .
H(95) C(66) 3.246 ? . .
H(95) C(67) 2.951 ? . .
H(95) H(43) 3.418 ? . 1_654
H(95) H(46) 3.366 ? . 1_654
H(95) H(56) 1.789 ? . .
H(95) H(88) 3.346 ? . .
H(95) H(89) 3.520 ? . .
H(95) H(90) 2.717 ? . .
H(95) H(91) 3.557 ? . .
H(95) H(93) 1.600 ? . .
H(95) H(94) 1.600 ? . .
H(96) C(32) 3.153 ? . 1_654
H(96) C(46) 3.082 ? . .
H(96) C(47) 2.944 ? . .
H(96) C(69) 2.052 ? . .
H(96) C(71) 2.498 ? . .
H(96) C(72) 3.223 ? . .
H(96) H(41) 2.709 ? . 1_654
H(96) H(42) 2.786 ? . 1_654
H(96) H(43) 3.539 ? . 1_654
H(96) H(56) 2.518 ? . .
H(96) H(97) 1.600 ? . .
H(96) H(98) 1.600 ? . .
H(96) H(99) 3.421 ? . .
H(96) H(100) 2.295 ? . .
H(96) H(101) 2.725 ? . .
H(96) H(102) 3.369 ? . .
H(96) H(103) 3.469 ? . .
H(96) H(106) 2.869 ? . 1_655
H(97) Cl(10) 3.432 ? . 1_564
H(97) Cl(11) 3.083 ? . 1_655
H(97) C(47) 3.304 ? . .
H(97) C(69) 2.052 ? . .
H(97) C(71) 2.954 ? . .
H(97) C(72) 2.396 ? . .
H(97) C(73) 3.560 ? . 1_655
H(97) H(15) 3.108 ? . .
H(97) H(96) 1.600 ? . .
H(97) H(98) 1.600 ? . .
H(97) H(99) 3.598 ? . .
H(97) H(100) 2.748 ? . .
H(97) H(101) 3.596 ? . .
H(97) H(102) 2.209 ? . .
H(97) H(103) 2.557 ? . .
H(97) H(104) 3.341 ? . .
H(97) H(106) 3.070 ? . 1_655
H(98) Cl(9) 3.353 ? . 1_564
H(98) C(19) 3.026 ? . .
H(98) C(20) 3.247 ? . .
H(98) C(46) 2.732 ? . .
H(98) C(47) 2.532 ? . .
H(98) C(69) 2.052 ? . .
H(98) C(71) 3.307 ? . .
H(98) C(72) 2.887 ? . .
H(98) H(7) 3.300 ? . .
H(98) H(13) 3.183 ? . .
H(98) H(14) 2.337 ? . .
H(98) H(15) 2.707 ? . .
H(98) H(56) 2.435 ? . .
H(98) H(96) 1.600 ? . .
H(98) H(97) 1.600 ? . .
H(98) H(100) 3.448 ? . .
H(98) H(102) 2.659 ? . .
H(98) H(103) 3.489 ? . .
H(98) H(104) 3.578 ? . .
H(99) C(36) 3.356 ? . 1_655
H(99) C(39) 3.595 ? . 1_655
H(99) C(40) 3.338 ? . 1_655
H(99) C(41) 3.425 ? . 1_655
H(99) C(47) 2.884 ? . .
H(99) C(48) 3.414 ? . .
H(99) C(69) 2.105 ? . .
H(99) C(70) 3.300 ? . .
H(99) C(72) 2.516 ? . .
H(99) H(50) 2.702 ? . 1_655
H(99) H(51) 3.327 ? . 1_655
H(99) H(52) 3.555 ? . 1_655
H(99) H(57) 3.270 ? . .
H(99) H(78) 3.594 ? . 1_655
H(99) H(86) 2.911 ? . 1_655
H(99) H(96) 3.421 ? . .
H(99) H(97) 3.598 ? . .
H(99) H(100) 1.600 ? . .
H(99) H(101) 1.600 ? . .
H(99) H(102) 3.459 ? . .
H(99) H(103) 2.345 ? . .
H(99) H(104) 2.669 ? . .
H(100) Cl(11) 3.301 ? . 1_655
H(100) C(47) 3.271 ? . .
H(100) C(60) 3.594 ? . 1_655
H(100) C(69) 2.105 ? . .
H(100) C(70) 2.523 ? . .
H(100) C(72) 2.920 ? . .
H(100) C(73) 3.021 ? . 1_655
H(100) H(42) 3.566 ? . 1_654
H(100) H(75) 3.112 ? . 1_655
H(100) H(77) 3.237 ? . 1_655
H(100) H(96) 2.295 ? . .
H(100) H(97) 2.748 ? . .
H(100) H(98) 3.448 ? . .
H(100) H(99) 1.600 ? . .
H(100) H(101) 1.600 ? . .
H(100) H(103) 2.672 ? . .
H(100) H(104) 3.522 ? . .
H(100) H(105) 3.262 ? . 1_655
H(100) H(106) 2.286 ? . 1_655
H(101) C(38) 3.496 ? . 1_655
H(101) C(39) 2.968 ? . 1_655
H(101) C(40) 3.133 ? . 1_655
H(101) C(46) 2.905 ? . .
H(101) C(47) 2.452 ? . .
H(101) C(48) 3.379 ? . .
H(101) C(61) 3.559 ? . 1_655
H(101) C(62) 3.180 ? . 1_655
H(101) C(69) 2.105 ? . .
H(101) C(70) 2.954 ? . .
H(101) C(72) 3.307 ? . .
H(101) H(53) 3.039 ? . 1_655
H(101) H(56) 2.878 ? . .
H(101) H(71) 3.487 ? . 1_655
H(101) H(75) 3.552 ? . 1_655
H(101) H(78) 2.708 ? . 1_655
H(101) H(80) 2.982 ? . 1_655
H(101) H(86) 3.314 ? . 1_655
H(101) H(96) 2.725 ? . .
H(101) H(97) 3.596 ? . .
H(101) H(99) 1.600 ? . .
H(101) H(100) 1.600 ? . .
H(101) H(103) 3.443 ? . .
H(101) H(104) 3.584 ? . .
H(102) N(1) 3.277 ? . .
H(102) C(6) 3.558 ? . .
H(102) C(7) 2.901 ? . .
H(102) C(15) 3.229 ? . .
H(102) C(20) 3.406 ? . .
H(102) C(47) 2.955 ? . .
H(102) C(48) 3.374 ? . .
H(102) C(69) 2.066 ? . .
H(102) C(70) 2.439 ? . .
H(102) C(71) 3.318 ? . .
H(102) H(2) 3.532 ? . .
H(102) H(3) 2.661 ? . .
H(102) H(7) 2.727 ? . .
H(102) H(15) 2.750 ? . .
H(102) H(57) 3.084 ? . .
H(102) H(96) 3.369 ? . .
H(102) H(97) 2.209 ? . .
H(102) H(98) 2.659 ? . .
H(102) H(99) 3.459 ? . .
H(102) H(103) 1.600 ? . .
H(102) H(104) 1.600 ? . .
H(103) Cl(11) 3.090 ? . 1_655
H(103) C(36) 3.328 ? . 1_655
H(103) C(47) 3.313 ? . .
H(103) C(69) 2.066 ? . .
H(103) C(70) 2.826 ? . .
H(103) C(71) 2.505 ? . .
H(103) H(48) 3.111 ? . 1_655
H(103) H(49) 3.442 ? . 1_655
H(103) H(50) 2.350 ? . 1_655
H(103) H(57) 3.334 ? . .
H(103) H(96) 3.469 ? . .
H(103) H(97) 2.557 ? . .
H(103) H(98) 3.489 ? . .
H(103) H(99) 2.345 ? . .
H(103) H(100) 2.672 ? . .
H(103) H(101) 3.443 ? . .
H(103) H(102) 1.600 ? . .
H(103) H(104) 1.600 ? . .
H(104) Cl(2) 3.209 ? . .
H(104) C(47) 2.543 ? . .
H(104) C(48) 2.456 ? . .
H(104) C(69) 2.066 ? . .
H(104) C(70) 3.248 ? . .
H(104) C(71) 2.906 ? . .
H(104) H(7) 3.157 ? . .
H(104) H(48) 2.869 ? . 1_655
H(104) H(50) 2.903 ? . 1_655
H(104) H(57) 1.853 ? . .
H(104) H(97) 3.341 ? . .
H(104) H(98) 3.578 ? . .
H(104) H(99) 2.669 ? . .
H(104) H(100) 3.522 ? . .
H(104) H(101) 3.584 ? . .
H(104) H(102) 1.600 ? . .
H(104) H(103) 1.600 ? . .
H(105) Cl(3) 2.690 ? . .
H(105) Cl(11) 2.312 ? . .
H(105) Cl(12) 2.206 ? . .
H(105) C(17) 3.557 ? . .
H(105) C(60) 3.388 ? . .
H(105) C(66) 3.375 ? . .
H(105) H(6) 3.579 ? . .
H(105) H(9) 3.055 ? . .
H(105) H(10) 3.199 ? . .
H(105) H(75) 3.360 ? . .
H(105) H(77) 2.721 ? . .
H(105) H(87) 2.891 ? . .
H(105) H(89) 2.997 ? . .
H(105) H(100) 3.262 ? . 1_455
H(105) H(106) 1.598 ? . .
H(106) Cl(11) 2.312 ? . .
H(106) Cl(12) 2.206 ? . .
H(106) C(60) 3.284 ? . .
H(106) C(70) 3.347 ? . 1_455
H(106) C(71) 3.247 ? . 1_455
H(106) H(42) 2.845 ? . 1_554
H(106) H(75) 2.803 ? . .
H(106) H(77) 2.929 ? . .
H(106) H(96) 2.869 ? . 1_455
H(106) H(97) 3.070 ? . 1_455
H(106) H(100) 2.286 ? . 1_455
H(106) H(105) 1.598 ? . .
H(107) Cl(2) 2.673 ? . .
H(107) Cl(5) 2.237 ? . .
H(107) Cl(6) 2.308 ? . .
H(107) C(24) 3.198 ? . .
H(107) C(31) 3.470 ? . .
H(107) H(23) 2.982 ? . .
H(107) H(24) 3.523 ? . .
H(107) H(25) 2.641 ? . .
H(107) H(38) 3.599 ? . .
H(107) H(40) 2.725 ? . .
H(107) H(48) 3.423 ? . 1_655
H(107) H(61) 3.579 ? . .
H(107) H(62) 3.025 ? . .
H(107) H(108) 1.599 ? . .
H(108) Cl(5) 2.237 ? . .
H(108) Cl(6) 2.308 ? . .
H(108) C(24) 3.382 ? . .
H(108) C(34) 3.170 ? . 1_655
H(108) C(35) 3.216 ? . 1_655
H(108) H(24) 3.456 ? . .
H(108) H(25) 2.630 ? . .
H(108) H(45) 2.212 ? . 1_655
H(108) H(47) 2.794 ? . 1_655
H(108) H(48) 2.901 ? . 1_655
H(108) H(88) 3.534 ? . 1_556
H(108) H(94) 2.906 ? . 1_556
H(108) H(107) 1.599 ? . .
H(109) Cl(7) 3.236 ? . .
H(109) Cl(9) 2.283 ? . .
H(109) Cl(10) 2.265 ? . .
H(109) C(59) 3.391 ? . 1_556
H(109) C(67) 2.837 ? . 1_556
H(109) H(72) 2.757 ? . 1_556
H(109) H(73) 3.462 ? . 1_556
H(109) H(74) 3.449 ? . 1_556
H(109) H(90) 2.703 ? . 1_556
H(109) H(91) 2.730 ? . 1_556
H(109) H(92) 2.593 ? . 1_556
H(109) H(110) 1.600 ? . .
H(109) H(111) 3.450 ? . .
H(110) Cl(4) 2.966 ? . 1_556
H(110) Cl(9) 2.283 ? . .
H(110) Cl(10) 2.265 ? . .
H(110) O(3) 3.576 ? . 1_556
H(110) C(59) 3.366 ? . 1_556
H(110) H(13) 3.424 ? . 1_546
H(110) H(15) 3.176 ? . 1_546
H(110) H(72) 2.808 ? . 1_556
H(110) H(74) 3.072 ? . 1_556
H(110) H(92) 3.024 ? . 1_556
H(110) H(109) 1.600 ? . .
H(111) Cl(7) 2.291 ? . .
H(111) Cl(8) 2.286 ? . .
H(111) Cl(10) 3.266 ? . .
H(111) C(23) 3.281 ? . 1_645
H(111) C(30) 2.860 ? . 1_645
H(111) H(20) 3.435 ? . 1_645
H(111) H(21) 2.986 ? . 1_645
H(111) H(22) 2.902 ? . 1_645
H(111) H(35) 2.544 ? . 1_645
H(111) H(36) 2.816 ? . 1_645
H(111) H(37) 2.738 ? . 1_645
H(111) H(109) 3.450 ? . .
H(111) H(112) 1.602 ? . .
H(112) Cl(1) 2.893 ? . 1_645
H(112) Cl(7) 2.291 ? . .
H(112) Cl(8) 2.286 ? . .
H(112) C(23) 3.316 ? . 1_645
H(112) H(20) 3.480 ? . 1_645
H(112) H(21) 3.462 ? . 1_645
H(112) H(22) 2.561 ? . 1_645
H(112) H(35) 3.171 ? . 1_645
H(112) H(37) 3.468 ? . 1_645
H(112) H(44) 3.484 ? . 1_655
H(112) H(66) 3.359 ? . 1_655
H(112) H(67) 3.537 ? . 1_655
H(112) H(68) 3.327 ? . 1_655
H(112) H(111) 1.602 ? . .


#==============================================================================

# Additional structures and associated data_? identifiers
# should be added at this point if there is more than one 
# structure analysis in the CIF.

#==============================================================================

#     End of CIF

#==============================================================================
